# Supplementary material for: Detection of long repeat expansions from PCR-free whole-genome sequence data
Source: PubMed Central journal article supplement (PMC5668946; doi:10.1101/gr.225672.117), 2017-11

a

| Sample ID        | Original RP-PCR | Final RP-PCR |
|------------------|-----------------|--------------|
| LP6008186-DNAC09 | Long            | wt           |

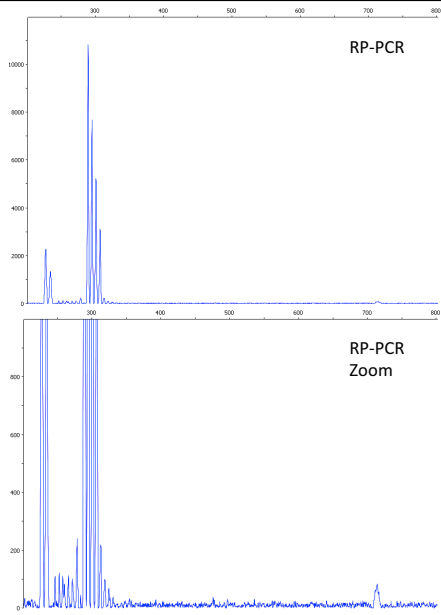

b

| Sample ID        | Original RP-PCR | Final RP-PCR |
|------------------|-----------------|--------------|
| LP6005616-DNAA01 | Long            | Wt           |

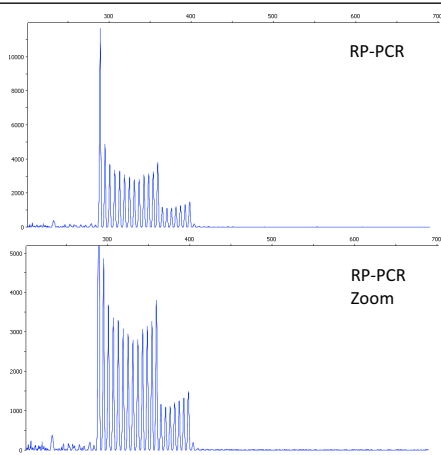

c

| Sample ID        | Original RP-PCR | Final RP-PCR |
|------------------|-----------------|--------------|
| LP6008240-DNAE11 | Long            | Wt           |

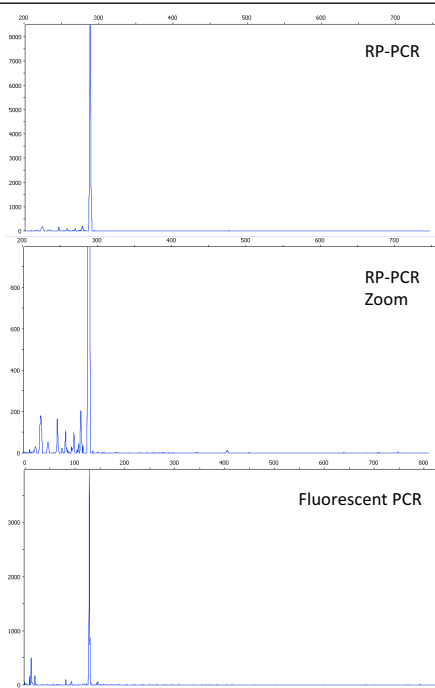

**e**

| Sample ID        | Original RP-PCR | Final RP-PCR |
|------------------|-----------------|--------------|
| LP6008234-DNAB12 | Wt              | Long         |

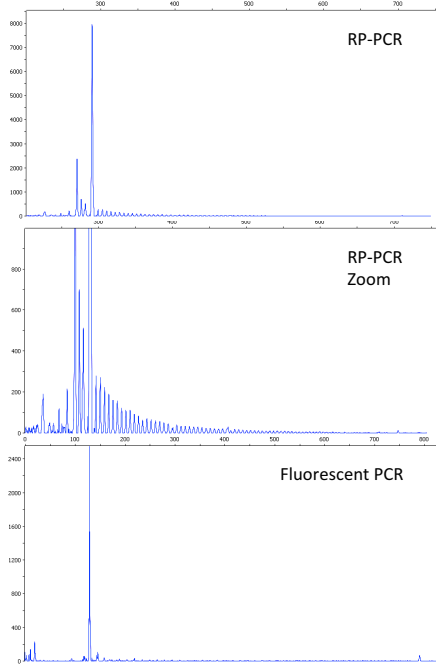**g**

| Sample ID        | Original RP-PCR | Final RP-PCR |
|------------------|-----------------|--------------|
| LP6008240-DNAA11 | Wt              | Long         |

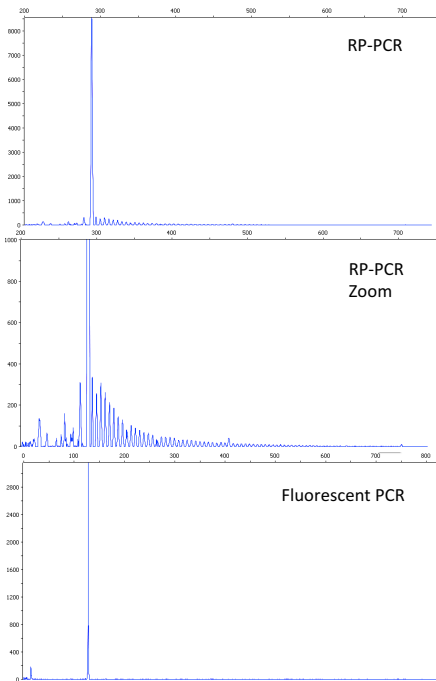**f**

| Sample ID        | Original RP-PCR | Final RP-PCR |
|------------------|-----------------|--------------|
| LP6008240-DNAC02 | Wt              | Long         |

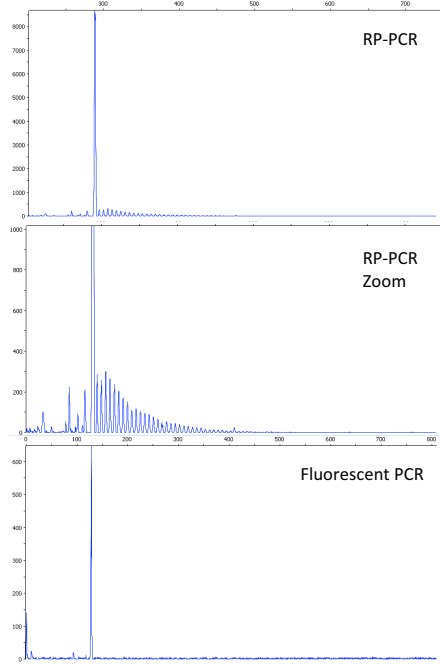**h**

| Sample ID        | Original RP-PCR | Final RP-PCR |
|------------------|-----------------|--------------|
| LP6008118-DNAG09 | Wt              | Long         |

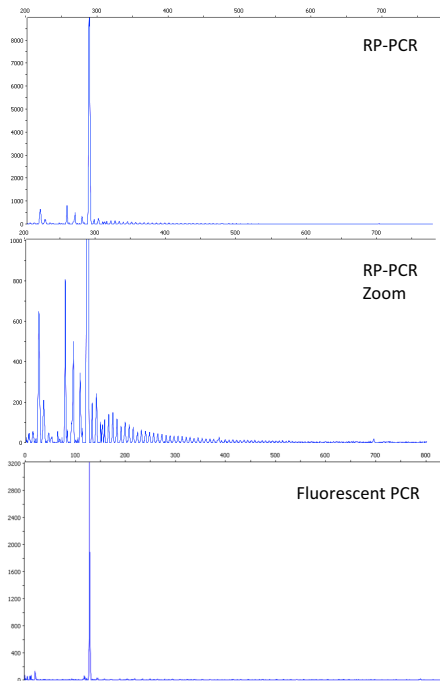

i

| Sample ID         | Original RP-PCR | Final RP-PCR |
|-------------------|-----------------|--------------|
| LP6005874-DNA_E11 | Wt              | Long         |

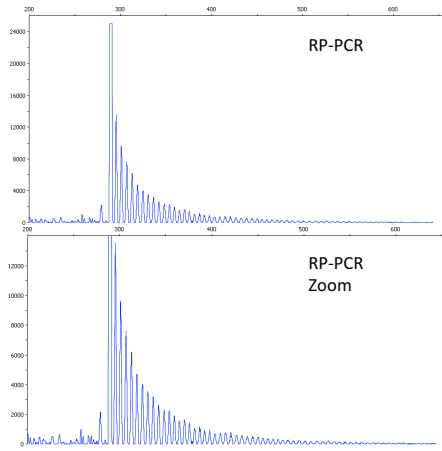

j

| Sample ID         | Original RP-PCR | Final RP-PCR |
|-------------------|-----------------|--------------|
| LP6005869-DNA_G04 | Wt              | Long         |

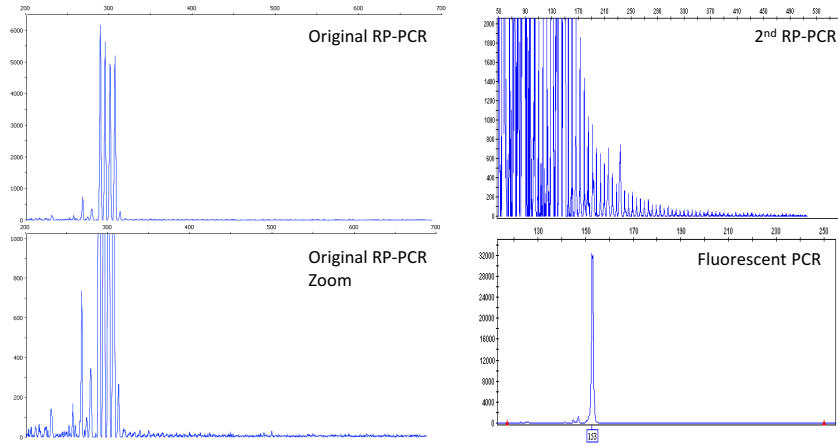

k

| Sample ID        | Original RP-PCR | Final RP-PCR |
|------------------|-----------------|--------------|
| LP6008123-DNAG07 | Wt              | Long         |

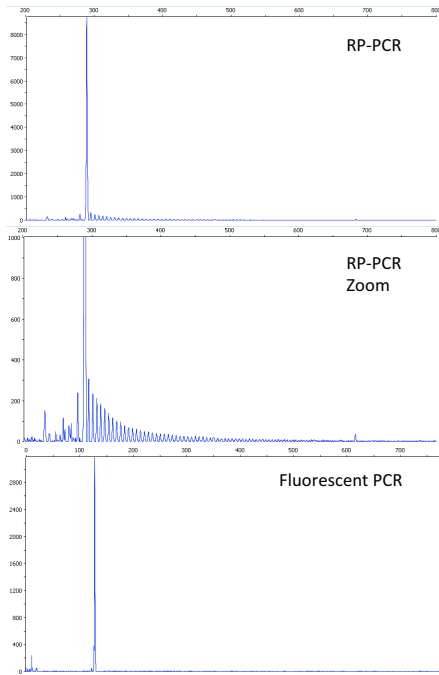

l

| Sample ID         | Original RP-PCR | Final RP-PCR |
|-------------------|-----------------|--------------|
| LP6008186-DNA_D04 | Wt              | Long         |

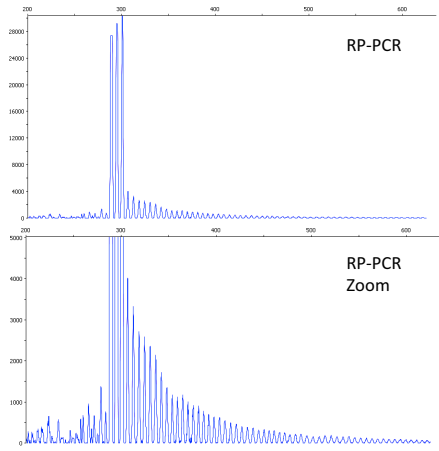

Supplement: supp_gr.225672.117_Supplemental_Fig_6.pdf [file supp_gr.225672.117_Supplemental_Fig_6.pdf]
