# Supplementary material for: Detection of long repeat expansions from PCR-free whole-genome sequence data
Source: Genome Res. 2017 Nov;27(11):1895–903. doi: 10.1101/gr.225672.117 (PMC5668946; doi:10.1101/gr.225672.117)
Supplement: Supplemental Material [file supp_gr.225672.117_Supplemental_Table_2.xlsx]

## Sheet: Sheet1
Sample ID	Cohort	Read length	Original PCR	2nd PCR	Final PCR	SB repeat number	SB position	Depth	LobStr genotype	EH genotype	EH genotype CI
LP6005616-DNA_A03	1	100	long	long	long	>450		46	2.0/2.33333	2/349	2-2/323-376
LP6005616-DNA_D02	1	100	long	long	long	>450		46	5.0	5/696	5-5/658-735
LP6005617-DNA_C07	1	100	long	long	long	>450		46	5.0	5/173	5-5/154-191
LP6005617-DNA_A10	1	100	long	long	long	>450		44		220/424	17-242/198-455
LP6005617-DNA_G03	1	100	long	long	long	>450		42	2.0	2/1056	2-2/1006-1106
LP6005618-DNA_B08	1	100	long	long	long	>450		38	0.333333	2/71	2-2/59-83
LP6005618-DNA_C01	1	100	long	long	long	>450		49	2.0	2/587	2-2/553-621
LP6005618-DNA_G11	1	100	long	long	long	>450		43	2.0/2.33333	2/397	2-2/367-427
LP6005617-DNA_F12	1	100	long	long	long	>450		46	5.0	5/464	5-5/433-495
LP6005617-DNA_G12	1	100	long	long	long	>450		47	2.0/2.33333	2/435	2-2/405-465
LP6005617-DNA_C01	1	100	long	long	long	>450		51	2.33333/5.0	5/426	5-5/399-455
LP6005621-DNA_G10	1	100	long	long	long	>450	Figure 4a, lane 4	45	2.0	2/318	2-2/293-344
LP6005615-DNA_B09	1	100	long	long	long	>450	Figure 4a, lane 10	47	4.0	5/482	5-5/450-513
LP6005615-DNA_A05	1	100	long	long	long	>450		47	2.0	2/548	2-2/514-580
LP6005615-DNA_H02	1	100	long	long	long	>450		41	1.33333/3.0	2/310	2-2/284-338
LP6005617-DNA_H11	1	100	long	long	long	>450		48		8/929	8-8/887-973
LP6005682-DNA_C03	1	100	long	long	long	>450	Figure 4a, lane 5	43	4.0	4/188	4-4/168-208
LP6005682-DNA_E08	1	100	long	long	long	>450	Figure 4a, lane 9	40	5.0	5/360	5-5/330-390
LP6005681-DNA_H11	1	100	long	long	long	>450	Figure 4a, lane 2	39	2.0/7.33333	2/338	2-2/309-367
LP6005682-DNA_C08	1	100	long	long	long	>450		42		8/355	8-8/326-384
LP6005682-DNA_F08	1	100	long	long	long	>450		40	2.0	2/121	2-2/104-138
LP6005681-DNA_F05	1	100	long	long	long	>450		36		309/602	17-339/279-644
LP6005682-DNA_G08	1	100	long	long	long	>450		39	2.0	2/292	2-2/265-319
LP6005681-DNA_B06	1	100	long	long	long	>450		36	2.0	2/296	2-2/267-325
LP6005681-DNA_E01	1	100	long	long	long	>450		40	2.0	2/496	2-2/461-531
LP6005616-DNA_E07	1	100	long	long	long	30-80		45	1.33333/6.0	6/38	6-6/31-45
LP6005620-DNA_G08	1	100	long	long	long	>450		40	2.0	2/353	2-2/324-382
LP6005618-DNA_B09	1	100	long	long	long	>450		40		2/59	2-2/49-69
LP6005621-DNA_D02	1	100	long	long	long	>450	Figure 4a, lane 3	40	2.0	2/389	2-2/358-419
LP6005615-DNA_E05	1	100	long	long	long	>450		44	2.0	2/547	2-2/512-582
LP6005620-DNA_B01	1	100	long	long	long	>450		39	2.0	2/319	2-2/290-348
LP6005874-DNA_H09	1	100	long	long	long	>450		43	0.333333/2.33333	8/277	8-8/253-302
LP6005874-DNA_E05	1	100	long	long	long	>450		38	5.0	5/476	5-5/442-511
LP6005874-DNA_H02	1	100	long	long	long	>450		47	1.33333/3.0	9/232	9-9/211-253
LP6005869-DNA_B07	1	100	long	long	long	>450		48	2.0/5.33333	2/375	2-2/348-402
LP6005869-DNA_G03	1	100	long	long	long	>450		43	2.0	2/369	2-2/340-398
LP6005871-DNA_C04	1	100	long	long	long	>450		46		254/492	17-276/231-523
LP6005869-DNA_E07	1	100	long	long	long	>450		42	3.0	8/284	8-8/259-310
LP6005871-DNA_F09	1	100	long	long	long	>450		44	2.0	2/255	2-2/232-279
LP6005872-DNA_C08	1	100	long	long	long	>450	Figure 4a, lane 7	49	3.0/8.0	8/282	8-8/258-305
LP6005872-DNA_C09	1	100	long	long	long	>450		49	3.0	2/279	2-2/256-301
LP6005872-DNA_H07	1	100	long	long	long	>450	Figure 4a, lane 8	51	2.0/3.16667	2/154	2-2/137-169
LP6005871-DNA_D12	1	100	long	long	long	>450	Figure 4a, lane 6	50	0.333333	2/91	2-2/79-103
LP6005874-DNA_E11	1	100	wt	long	long	>450		40	2.0	2/346	2-2/316-375
LP6005869-DNA_B09	1	100	long	long	long	>450		41	1.33333	196/377	17-217/175-407
LP6005869-DNA_F09	1	100	long	long	long	>450		42	2.0	2/355	2-2/327-384
LP6005869-DNA_G04	1	100	wt	long	long	>450		44	1.33333/3.0	6/362	6-6/335-390
LP6005873-DNA_D11	1	100	long	long	long	>450		48		8/291	8-8/267-314
LP6005873-DNA_F12	1	100	long	long	long	>450		36	2.0	2/174	2-2/153-196
LP6005873-DNA_G11	1	100	long	long	long	>450		48	5.33333	2/137	2-2/121-152
LP6005875-DNA_B02	1	100	long	long	long	>450		39	3.33333	8/329	8-8/300-358
LP6005875-DNA_A07	1	100	long	long	long	>450		48		2/326	2-2/302-351
LP6008191-DNA_H07	1	150	long	long	long	~2717	Supplementary Figure 6a, lane 3	54	2.0	2/534	2-2/496-573
LP6008193-DNA_H02	1	150	long	long	long	~2483	Supplementary Figure 6a, lane 1	42	2.0	2/594	2-2/546-641
LP6008193-DNA_A04	1	150	long	long	long	~2850	Supplementary Figure 6a, lane 2	43	5.0	5/458	5-5/417-498
LP6005616-DNA_A01	1	100	long	wt	wt	15-30		47		19/23	17-21/16-26
LP6005618-DNA_F11	1	100	wt	wt	wt	15-30		41	2.0	2/18	2-2/16-20
LP6005617-DNA_G11	1	100	wt	wt	wt	15-30		46	5.0	5/18	5-5/16-19
LP6005616-DNA_A08	1	100	wt	wt	wt	15-30		48	2.0	2/21	2-2/18-24
LP6005621-DNA_C08	1	100	wt	wt	wt	15-30		49	2.0	2/20	2-2/17-22
LP6005871-DNA_H10	1	100	wt	wt	wt	15-30		47	2.0	2/18	2-2/16-21
LP6005872-DNA_E11	1	100	wt	wt	wt	15-30		46	2.0/2.33333	2/18	2-2/16-19
LP6005869-DNA_C05	1	100	wt	wt	wt	15-30		44		7/22	7-7/18-25
LP6005872-DNA_A08	1	100	wt	wt	wt	15-30		53	2.0	2/19	2-2/17-21
LP6005869-DNA_A10	1	100	wt	wt	wt	15-30		42	1.33333	10/20	10-10/17-23
LP6005869-DNA_B10	1	100	wt	wt	wt	15-30		44	4.0	4/20	4-4/17-23
LP6005871-DNA_B02	1	100	wt	wt	wt	15-30		42	4.0	4/24	4-4/19-28
LP6005872-DNA_B12	1	100	wt	wt	wt	15-30		50	3.0/5.0	5/19	5-5/16-21
LP6005872-DNA_G06	1	100	wt	wt	wt	15-30		49	6.33333	18/19	17-19/16-21
LP6005873-DNA_H12	1	100	wt	wt	wt	15-30		47	1.33333	8/18	8-8/16-21
LP6005874-DNA_G02	1	100	long	wt	wt, 28-30 repeats	15-30		44	2.0	2/28	2-2/22-32
LP6005616-DNA_A02	1	100	wt		wt			48	2.0/5.0	2/5	2-2/5-5
LP6005616-DNA_A05	1	100	wt		wt			46	2.0	2/2	2-2/2-2
LP6005616-DNA_B02	1	100	wt		wt			46	1.33333/6.0	6/8	6-6/8-8
LP6005616-DNA_B04	1	100	wt		wt			48	2.0	2/2	2-2/2-2
LP6005616-DNA_C01	1	100	wt		wt			47	2.0	2/2	2-2/2-2
LP6005616-DNA_C03	1	100	wt		wt			45	2.0/5.0	2/5	2-2/5-5
LP6005616-DNA_C04	1	100	wt		wt			44	2.0	2/2	2-2/2-2
LP6005616-DNA_C10	1	100	wt		wt			48	2.0	2/11	2-2/11-11
LP6005616-DNA_D04	1	100	wt		wt			52	2.0/6.0	2/6	2-2/6-6
LP6005616-DNA_E01	1	100	wt		wt			50	2.0/6.0	2/6	2-2/6-6
LP6005616-DNA_F01	1	100	wt		wt			57	2.0	2/2	2-2/2-2
LP6005616-DNA_F02	1	100	wt		wt			47	3.0	8/10	8-8/10-10
LP6005616-DNA_F10	1	100	wt		wt			49	2.0/5.0	2/5	2-2/5-5
LP6005616-DNA_G01	1	100	wt		wt			47	2.0/5.0	2/5	2-2/5-5
LP6005616-DNA_H01	1	100	wt		wt			46	2.0/8.0	2/8	2-2/8-8
LP6005616-DNA_H04	1	100	wt		wt			50	2.0	2/2	2-2/2-2
LP6005617-DNA_D03	1	100	wt		wt			43	5.0	5/5	5-5/5-5
LP6005617-DNA_E03	1	100	wt		wt			43	2.0/3.0	2/2	2-2/2-2
LP6005616-DNA_B01	1	100	wt		wt			46	5.0	5/10	5-5/10-10
LP6005616-DNA_D10	1	100	wt		wt			51	8.0	8/13	8-8/13-13
LP6005616-DNA_E02	1	100	wt		wt			45	2.0	2/2	2-2/2-2
LP6005616-DNA_G02	1	100	wt		wt			49	1.33333/5.0	5/6	5-5/6-6
LP6005616-DNA_H02	1	100	wt		wt			48	2.0	2/2	2-2/2-2
LP6005616-DNA_H11	1	100	wt		wt			50	2.0/5.0	2/5	2-2/5-5
LP6005617-DNA_A02	1	100	wt		wt			55	2.0/5.0	2/5	2-2/5-5
LP6005617-DNA_A07	1	100	wt		wt			50	2.33333/8.0	8/13	8-8/13-13
LP6005617-DNA_B07	1	100	wt		wt			44	2.0	2/2	2-2/2-2
LP6005617-DNA_C09	1	100	wt		wt			45	2.0/3.0	2/7	2-2/7-7
LP6005617-DNA_D07	1	100	wt		wt			48	2.0	2/2	2-2/2-2
LP6005617-DNA_D08	1	100	wt		wt			44	2.0/5.0	2/5	2-2/5-5
LP6005617-DNA_D09	1	100	wt		wt			53	2.0	2/2	2-2/2-2
LP6005617-DNA_E01	1	100	wt		wt			51	2.0	2/2	2-2/2-2
LP6005617-DNA_E06	1	100	wt		wt			45	2.0/3.0	2/8	2-2/8-8
LP6005617-DNA_E07	1	100	wt		wt			44	2.0	2/2	2-2/2-2
LP6005617-DNA_E08	1	100	wt		wt			46	10.0	2/10	2-2/10-10
LP6005617-DNA_F06	1	100	wt		wt			47	2.0/5.0	2/5	2-2/5-5
LP6005617-DNA_F07	1	100	wt		wt			51	0.333333/6.0	5/6	5-5/6-6
LP6005617-DNA_F08	1	100	wt		wt			45	2.0/6.0	2/6	2-2/6-6
LP6005617-DNA_F09	1	100	wt		wt			48	2.0	2/2	2-2/2-2
LP6005617-DNA_G06	1	100	wt		wt			49	2.0/6.0	2/6	2-2/6-6
LP6005617-DNA_G09	1	100	wt		wt			45	2.0/10.0	2/10	2-2/10-10
LP6005616-DNA_A04	1	100	wt		wt			53	3.0/5.0	5/5	5-5/5-5
LP6005616-DNA_D03	1	100	wt		wt			46	3.0/5.0	5/6	5-5/6-6
LP6005616-DNA_E03	1	100	wt		wt			47	2.0	2/2	2-2/2-2
LP6005616-DNA_E11	1	100	wt		wt			52	5.0/6.0	5/6	5-5/6-6
LP6005616-DNA_F03	1	100	wt		wt			47	2.0/8.0	2/8	2-2/8-8
LP6005616-DNA_G11	1	100	wt		wt			48	2.0	2/2	2-2/2-2
LP6005616-DNA_H03	1	100	wt		wt			51	2.33333/8.0	2/8	2-2/8-8
LP6005616-DNA_H10	1	100	wt		wt			53	2.0/8.0	2/8	2-2/8-8
LP6005617-DNA_A03	1	100	wt		wt			47	1.33333/5.0	5/5	5-5/5-5
LP6005617-DNA_A04	1	100	wt		wt			43	3.0/8.0	8/8	8-8/8-8
LP6005617-DNA_A05	1	100	wt		wt			43	2.0/6.0	2/6	2-2/6-6
LP6005617-DNA_B02	1	100	wt		wt			51	2.0/10.0	2/10	2-2/10-10
LP6005617-DNA_B03	1	100	wt		wt			42	2.0	2/2	2-2/2-2
LP6005617-DNA_B06	1	100	wt		wt			40	0.333333/5.0	5/8	5-5/8-8
LP6005617-DNA_B08	1	100	wt		wt			40	6.0	4/6	4-4/6-6
LP6005617-DNA_C02	1	100	wt		wt			35	2.0	2/11	2-2/11-11
LP6005617-DNA_C03	1	100	wt		wt			46	5.0/9.0	5/9	5-5/9-9
LP6005617-DNA_C04	1	100	wt		wt			42	2.0/5.0	2/5	2-2/5-5
LP6005617-DNA_C06	1	100	wt		wt			46	6.0	6/10	6-6/10-10
LP6005617-DNA_C08	1	100	wt		wt			43	2.0	2/2	2-2/2-2
LP6005617-DNA_D04	1	100	wt		wt			41	2.0	2/2	2-2/2-2
LP6005617-DNA_E02	1	100	wt		wt			46	2.0	2/8	2-2/8-8
LP6005617-DNA_F04	1	100	wt		wt			39	3.0	5/5	5-5/5-5
LP6005617-DNA_G04	1	100	wt		wt			40	6.0	6/8	6-6/8-8
LP6005617-DNA_G05	1	100	wt		wt			43	2.0	2/2	2-2/2-2
LP6005617-DNA_H03	1	100	wt		wt			43	2.0/5.0	2/5	2-2/5-5
LP6005617-DNA_H04	1	100	wt		wt			42	2.0	2/7	2-2/7-7
LP6005617-DNA_H05	1	100	wt		wt			40	1.33333/5.0	5/6	5-5/6-6
LP6005616-DNA_A07	1	100	wt		wt			43	2.0/5.0	2/5	2-2/5-5
LP6005616-DNA_D07	1	100	wt		wt			43	2.33333/8.0	8/8	8-8/8-8
LP6005617-DNA_A11	1	100	wt		wt			43	1.33333/2.0	2/8	2-2/8-8
LP6005617-DNA_B11	1	100	wt		wt			45	1.33333/6.0	6/10	6-6/10-10
LP6005617-DNA_F01	1	100	wt		wt			57	2.0	2/2	2-2/2-2
LP6005617-DNA_G01	1	100	wt		wt			58	2.0/8.0	2/8	2-2/8-8
LP6005617-DNA_H01	1	100	long		long			52	3.0	2/363	2-2/338-388
LP6005618-DNA_A05	1	100	wt		wt			44	2.0	2/2	2-2/2-2
LP6005618-DNA_A08	1	100	wt		wt			41	5.0	2/5	2-2/5-5
LP6005618-DNA_A11	1	100	wt		wt			43	2.0/5.0	2/5	2-2/5-5
LP6005618-DNA_C06	1	100	wt		wt			43	2.0	2/2	2-2/2-2
LP6005618-DNA_D12	1	100	wt		wt			42	2.0	2/2	2-2/2-2
LP6005618-DNA_E07	1	100	wt		wt			48	2.0/6.0	2/6	2-2/6-6
LP6005618-DNA_F04	1	100	wt		wt			48	2.0	2/8	2-2/8-8
LP6005618-DNA_F07	1	100	wt		wt			46	10.0	2/10	2-2/10-10
LP6005618-DNA_G04	1	100	wt		wt			50	2.0/2.33333	2/8	2-2/8-8
LP6005618-DNA_H07	1	100	wt		wt			42	2.0	2/2	2-2/2-2
LP6005620-DNA_A01	1	100	wt		wt			41	2.0/5.0	2/5	2-2/5-5
LP6005616-DNA_B09	1	100	wt		wt			34	2.0/5.0	2/5	2-2/5-5
LP6005617-DNA_C10	1	100	wt		wt			45	3.0/5.0	2/5	2-2/5-5
LP6005617-DNA_E10	1	100	wt		wt			47	2.0/5.0	2/5	2-2/5-5
LP6005617-DNA_F03	1	100	wt		wt			40	2.0	2/12	2-2/12-12
LP6005617-DNA_F05	1	100	wt		wt			38	3.0/8.0	5/8	5-5/8-8
LP6005617-DNA_F10	1	100	wt		wt			47	2.0/8.0	2/8	2-2/8-8
LP6005617-DNA_G10	1	100	wt		wt			48	2.0	2/2	2-2/2-2
LP6005617-DNA_H09	1	100	wt		wt			46	2.0	2/2	2-2/2-2
LP6005617-DNA_H10	1	100	wt		wt			47	1.33333/8.0	8/12	8-8/12-12
LP6005618-DNA_A01	1	100	wt		wt			49	3.0/8.0	5/8	5-5/8-8
LP6005618-DNA_A02	1	100	wt		wt			47	4.0	4/8	4-4/8-8
LP6005618-DNA_B01	1	100	wt		wt			47	2.0/8.0	2/8	2-2/8-8
LP6005618-DNA_C09	1	100	wt		wt			46	3.0	8/10	8-8/10-10
LP6005618-DNA_F02	1	100	wt		wt			49	2.0	2/8	2-2/8-8
LP6005618-DNA_G01	1	100	wt		wt			49	2.0	2/2	2-2/2-2
LP6005618-DNA_G02	1	100	wt		wt			46	1.33333/2.0	2/5	2-2/5-5
LP6005621-DNA_A05	1	100	wt		wt			49	1.33333/2.33333	2/8	2-2/8-8
LP6005621-DNA_A12	1	100	wt		wt			37	2.0/5.0	2/5	2-2/5-5
LP6005621-DNA_B12	1	100	wt		wt			42	4.0/5.0	4/5	4-4/5-5
LP6005621-DNA_D12	1	100	wt		wt			46	3.0/5.0	5/10	5-5/10-10
LP6005621-DNA_E05	1	100	wt		wt			40	5.0/8.0	5/8	5-5/8-8
LP6005621-DNA_E12	1	100	wt		wt			42	2.0/3.0	2/12	2-2/12-12
LP6005616-DNA_G06	1	100	wt		wt			44	2.0/8.0	2/8	2-2/8-8
LP6005618-DNA_B05	1	100	wt		wt			42	5.0	5/8	5-5/8-8
LP6005618-DNA_B06	1	100	wt		wt			43	2.0	2/2	2-2/2-2
LP6005618-DNA_C03	1	100	wt		wt			42	2.0/4.0	2/4	2-2/4-4
LP6005618-DNA_C05	1	100	wt		wt			45	2.0	2/2	2-2/2-2
LP6005618-DNA_C11	1	100	wt		wt			43	2.0/5.0	2/5	2-2/5-5
LP6005618-DNA_D04	1	100	wt		wt			47	2.0	2/2	2-2/2-2
LP6005618-DNA_E04	1	100	wt		wt			47	2.33333/8.0	8/12	8-8/12-12
LP6005618-DNA_E11	1	100	wt		wt			42	2.0/7.0	2/7	2-2/7-7
LP6005618-DNA_F05	1	100	wt		wt			42		5/5	5-5/5-5
LP6005618-DNA_G10	1	100	wt		wt			45	2.0	2/2	2-2/2-2
LP6005618-DNA_H02	1	100	wt		wt			44	0.333333/2.0	2/13	2-2/13-13
LP6005618-DNA_H10	1	100	wt		wt			42	7.0	2/7	2-2/7-7
LP6005616-DNA_A09	1	100	wt		wt			53	1.33333/5.0	5/5	5-5/5-5
LP6005617-DNA_C11	1	100	wt		wt			46	2.0	2/2	2-2/2-2
LP6005617-DNA_D06	1	100	wt		wt			39	3.0/5.0	5/5	5-5/5-5
LP6005617-DNA_D11	1	100	wt		wt			46	2.0/8.0	2/8	2-2/8-8
LP6005617-DNA_D12	1	100	wt		wt			45	2.0	2/2	2-2/2-2
LP6005617-DNA_E11	1	100	wt		wt			47	2.16667/4.0	2/4	2-2/4-4
LP6005617-DNA_E12	1	100	wt		wt			50	2.0	2/2	2-2/2-2
LP6005617-DNA_F11	1	100	wt		wt			47	2.0	2/2	2-2/2-2
LP6005618-DNA_A03	1	100	wt		wt			43	2.0	2/19	2-2/16-21
LP6005618-DNA_A07	1	100	wt		wt			46	2.0/5.0	2/5	2-2/5-5
LP6005618-DNA_B03	1	100	wt		wt			42	5.0	5/5	5-5/5-5
LP6005618-DNA_B04	1	100	wt		wt			43	2.0	2/2	2-2/2-2
LP6005618-DNA_B07	1	100	wt		wt			43	2.0/4.0	2/4	2-2/4-4
LP6005618-DNA_B12	1	100	wt		wt			38	2.0/6.0	2/6	2-2/6-6
LP6005618-DNA_C07	1	100	wt		wt			45	2.0	2/2	2-2/2-2
LP6005618-DNA_D01	1	100	wt		wt			50	3.0/5.0	5/14	5-5/14-14
LP6005618-DNA_D02	1	100	wt		wt			44	2.0/6.0	2/14	2-2/14-14
LP6005618-DNA_D03	1	100	wt		wt			41	2.0	2/2	2-2/2-2
LP6005618-DNA_D07	1	100	wt		wt			46	8.0	2/8	2-2/8-8
LP6005618-DNA_D08	1	100	wt		wt			40	2.0	2/8	2-2/8-8
LP6005618-DNA_E01	1	100	wt		wt			49	2.0/6.0	2/6	2-2/6-6
LP6005618-DNA_E06	1	100	wt		wt			46	2.0/5.0	2/5	2-2/5-5
LP6005618-DNA_F03	1	100	wt		wt			42	1.33333/8.0	6/8	6-6/8-8
LP6005618-DNA_G03	1	100	wt		wt			44	2.0	2/5	2-2/5-5
LP6005618-DNA_G05	1	100	wt		wt			47	2.0/4.0	2/4	2-2/4-4
LP6005618-DNA_G06	1	100	wt		wt			44	2.0	2/2	2-2/2-2
LP6005618-DNA_H03	1	100	wt		wt			47	2.0	2/2	2-2/2-2
LP6005618-DNA_H06	1	100	wt		wt			45	2.0	2/7	2-2/7-7
LP6005618-DNA_H12	1	100	wt		wt			41	2.0	2/2	2-2/2-2
LP6005621-DNA_A10	1	100	wt		wt			46	2.0/2.33333	2/8	2-2/8-8
LP6005621-DNA_A11	1	100	wt		wt			44	2.0/3.0	2/2	2-2/2-2
LP6005621-DNA_B10	1	100	wt		wt			34	1.33333/2.0	2/8	2-2/8-8
LP6005621-DNA_C06	1	100	wt		wt			51	1.33333/5.0	5/6	5-5/6-6
LP6005621-DNA_C11	1	100	wt		wt			44	2.0	2/7	2-2/7-7
LP6005621-DNA_D10	1	100	wt		wt			36	3.0/5.0	2/5	2-2/5-5
LP6005621-DNA_E07	1	100	wt		wt			49	2.0	2/2	2-2/2-2
LP6005621-DNA_E10	1	100	wt		wt			41	2.0	2/2	2-2/2-2
LP6005621-DNA_E11	1	100	wt		wt			43	2.0/5.0	2/5	2-2/5-5
LP6005621-DNA_F12	1	100	wt		wt			45	2.0	2/2	2-2/2-2
LP6005621-DNA_G06	1	100	wt		wt			56	2.0	2/2	2-2/2-2
LP6005621-DNA_G07	1	100	wt		wt			40	0.333333/2.0	2/10	2-2/10-10
LP6005621-DNA_G09	1	100	wt		wt			51	2.0/6.0	2/6	2-2/6-6
LP6005621-DNA_H06	1	100	wt		wt			45	5.0	5/5	5-5/5-5
LP6005617-DNA_H02	1	100	wt		wt			45	2.0/8.0	2/8	2-2/8-8
LP6005620-DNA_H04	1	100	wt		wt			38	2.0/2.33333	2/7	2-2/7-7
LP6005621-DNA_H10	1	100	wt		wt			46	0.333333/2.0	2/7	2-2/7-8
LP6005621-DNA_A09	1	100	wt		wt			48	6.0	6/6	6-6/6-6
LP6005621-DNA_D09	1	100	wt		wt			43	1.33333/6.0	6/8	6-6/8-8
LP6005617-DNA_G07	1	100	wt		wt			53	2.0/5.0	2/5	2-2/5-5
LP6005618-DNA_E08	1	100	wt		wt			43	2.0/5.0	2/5	2-2/5-5
LP6005618-DNA_H08	1	100	wt		wt			40	2.0/2.33333	2/8	2-2/8-8
LP6005621-DNA_D01	1	100	wt		wt			47	2.0	2/2	2-2/2-2
LP6005618-DNA_H09	1	100	wt		wt			37	2.0	2/2	2-2/2-2
LP6005621-DNA_C09	1	100	wt		wt			48	2.0	2/2	2-2/2-2
LP6005621-DNA_B09	1	100	wt		wt			47	2.0	2/2	2-2/2-2
LP6005616-DNA_F12	1	100	wt		wt			48	2.0/2.33333	2/8	2-2/8-8
LP6005621-DNA_C01	1	100	wt		wt			48	2.0/5.0	2/5	2-2/5-5
LP6005618-DNA_F10	1	100	wt		wt			42	5.0/10.0	5/10	5-5/10-10
LP6005621-DNA_C12	1	100	wt		wt			44	2.0/5.0	2/5	2-2/5-5
LP6005621-DNA_G11	1	100	wt		wt			41	2.0	2/16	2-2/16-16
LP6005621-DNA_H12	1	100	wt		wt			48	2.0/6.0	2/6	2-2/6-6
LP6005615-DNA_B08	1	100	wt		wt			49	2.0	2/8	2-2/8-8
LP6005615-DNA_C11	1	100	wt		wt			51	2.0/5.0	2/5	2-2/5-5
LP6005615-DNA_D07	1	100	long		long			56	2.0	2/425	2-2/400-451
LP6005615-DNA_D11	1	100	wt		wt			50	2.0/5.0	2/5	2-2/5-5
LP6005615-DNA_E06	1	100	wt		wt			37	2.0	2/2	2-2/2-2
LP6005615-DNA_F06	1	100	wt		wt			44	2.0	2/8	2-2/8-8
LP6005615-DNA_F10	1	100	wt		wt			43		2/14	2-2/14-14
LP6005615-DNA_A10	1	100	wt		wt			54	1.33333/6.0	6/8	6-6/8-8
LP6005615-DNA_F09	1	100	wt		wt			48		2/12	2-2/12-12
LP6005615-DNA_G08	1	100	wt		wt			47	2.0	2/2	2-2/2-2
LP6005615-DNA_D10	1	100	wt		wt			48	2.0	2/2	2-2/2-2
LP6005615-DNA_A11	1	100	wt		wt			48	3.0/5.0	5/5	5-5/5-5
LP6005615-DNA_E10	1	100	wt		wt			47	2.0/8.0	2/8	2-2/8-8
LP6005615-DNA_A06	1	100	wt		wt			52	2.33333/8.0	2/8	2-2/8-8
LP6005615-DNA_B06	1	100	wt		wt			49	2.0	2/10	2-2/10-10
LP6005615-DNA_A02	1	100	wt		wt			52	2.33333	2/10	2-2/10-10
LP6005615-DNA_B03	1	100	long		long			43	1.33333	12/599	12-12/563-636
LP6005615-DNA_C01	1	100	wt		wt			41	2.0/4.0	2/4	2-2/4-4
LP6005615-DNA_D03	1	100	wt		wt			39	5.0	2/5	2-2/5-5
LP6005615-DNA_D04	1	100	wt		wt			43	4.33333/5.33333	2/11	2-2/11-11
LP6005615-DNA_D05	1	100	wt		wt			49	2.0/5.0	2/5	2-2/5-5
LP6005615-DNA_E04	1	100	wt		wt			41	2.0/5.0	2/5	2-2/5-5
LP6005615-DNA_G02	1	100	wt		wt			47	1.33333/5.0	5/5	5-5/5-5
LP6005615-DNA_G04	1	100	wt		wt			49	2.0	2/2	2-2/2-2
LP6005615-DNA_H04	1	100	wt		wt			43	2.0	2/8	2-2/8-8
LP6005616-DNA_C12	1	100	wt		wt			47	2.0	2/2	2-2/2-2
LP6005616-DNA_D01	1	100	wt		wt			47	1.33333/5.0	5/5	5-5/5-5
LP6005616-DNA_G07	1	100	wt		wt			48	2.0/2.33333	2/11	2-2/11-11
LP6005618-DNA_A04	1	100	long		long			44		8/471	8-8/440-503
LP6005618-DNA_A06	1	100	wt		wt			45	0.333333/3.0	8/12	8-8/12-12
LP6005618-DNA_C02	1	100	wt		wt			50	2.0/5.0	2/5	2-2/5-5
LP6005618-DNA_C04	1	100	long		long			49		10/457	10-10/428-487
LP6005618-DNA_F06	1	100	wt		wt			46	5.0	2/5	2-2/5-5
LP6005618-DNA_G09	1	100	wt		wt			36	2.0	2/2	2-2/2-2
LP6005620-DNA_G03	1	100	wt		wt			39	2.0/8.0	2/8	2-2/8-8
LP6005621-DNA_B07	1	100	wt		wt			40	5.0	5/12	5-5/12-12
LP6005621-DNA_E04	1	100	wt		wt			59	2.0/6.0	2/6	2-2/6-6
LP6005617-DNA_A12	1	100	wt		wt			46	3.0/5.0	5/9	5-5/9-9
LP6005618-DNA_E02	1	100	wt		wt			47	2.0/8.0	2/8	2-2/8-8
LP6005618-DNA_H04	1	100	wt		wt			44	6.0	6/8	6-6/8-8
LP6005615-DNA_F08	1	100	wt		wt			51	2.0	2/2	2-2/2-2
LP6005615-DNA_H06	1	100	wt		wt			51	0.333333/7.0	7/8	7-7/8-8
LP6005615-DNA_B07	1	100	wt		wt			34	2.0/5.0	2/5	2-2/5-5
LP6005615-DNA_C08	1	100	wt		wt			56	2.0/2.33333	2/9	2-2/9-9
LP6005617-DNA_A08	1	100	wt		wt			43	2.0/5.0	2/5	2-2/5-5
LP6005617-DNA_H07	1	100	wt		wt			48	2.33333/5.0	5/8	5-5/8-8
LP6005618-DNA_E09	1	100	wt		wt			41	1.33333/6.0	6/8	6-6/8-8
LP6005620-DNA_A04	1	100	wt		wt			38	2.0	2/2	2-2/2-2
LP6005620-DNA_H03	1	100	wt		wt			36	2.0	2/2	2-2/2-2
LP6005621-DNA_F07	1	100	wt		wt			55	1.33333/5.0	5/8	5-5/8-8
LP6005621-DNA_H09	1	100	wt		wt			52	2.0/6.0	2/6	2-2/6-6
LP6005621-DNA_H11	1	100	wt		wt			50	2.0	2/2	2-2/2-2
LP6005681-DNA_B10	1	100	wt		wt			38	2.0/6.0	2/6	2-2/6-6
LP6005681-DNA_B12	1	100	wt		wt			41	1.33333/5.0	5/6	5-5/6-6
LP6005681-DNA_C12	1	100	wt		wt			37	2.0	2/2	2-2/2-2
LP6005681-DNA_D10	1	100	wt		wt			38	2.0/4.0	2/4	2-2/4-4
LP6005681-DNA_E09	1	100	wt		wt			35	2.0	2/2	2-2/2-2
LP6005681-DNA_E10	1	100	wt		wt			41	2.0	2/2	2-2/2-2
LP6005681-DNA_F09	1	100	wt		wt			40	1.33333/7.0	6/7	6-6/7-7
LP6005681-DNA_F10	1	100	wt		wt			39	3.0/7.0	2/7	2-2/7-7
LP6005681-DNA_G10	1	100	wt		wt			39	2.0/6.0	2/6	2-2/6-6
LP6005681-DNA_H10	1	100	wt		wt			40	2.0/6.0	2/6	2-2/6-6
LP6005682-DNA_A02	1	100	wt		wt			49	2.0	2/2	2-2/2-2
LP6005682-DNA_A03	1	100	wt		wt			48	2.0	2/2	2-2/2-2
LP6005682-DNA_B02	1	100	wt		wt			46	2.0/3.16667	2/5	2-2/5-5
LP6005682-DNA_B03	1	100	wt		wt			47	4.0/5.0	4/5	4-4/5-5
LP6005682-DNA_C02	1	100	wt		wt			48	2.0/3.0	2/6	2-2/6-6
LP6005682-DNA_D02	1	100	wt		wt			49	2.33333/5.0	5/8	5-5/8-8
LP6005682-DNA_D03	1	100	wt		wt			43	2.0	2/2	2-2/2-2
LP6005682-DNA_E01	1	100	wt		wt			34	2.0/5.0	2/5	2-2/5-5
LP6005682-DNA_E02	1	100	wt		wt			48	8.0	6/8	6-6/8-8
LP6005682-DNA_E03	1	100	wt		wt			45	2.0	2/2	2-2/2-2
LP6005682-DNA_F01	1	100	wt		wt			38	2.0	2/2	2-2/2-2
LP6005682-DNA_F02	1	100	wt		wt			48	2.0	2/2	2-2/2-2
LP6005682-DNA_F03	1	100	wt		wt			44	2.0	2/8	2-2/8-8
LP6005682-DNA_G01	1	100	wt		wt			39	2.0	2/2	2-2/2-2
LP6005682-DNA_G02	1	100	wt		wt			46	3.0	2/8	2-2/8-8
LP6005682-DNA_G03	1	100	wt		wt			45	2.0	2/2	2-2/2-2
LP6005682-DNA_H01	1	100	wt		wt			38	2.0	2/2	2-2/2-2
LP6005682-DNA_H02	1	100	wt		wt			44	2.0/2.16667	2/2	2-2/2-2
LP6005682-DNA_H03	1	100	wt		wt			43	2.0	2/2	2-2/2-2
LP6005682-DNA_H06	1	100	wt		wt			47	3.0/5.0	2/5	2-2/5-5
LP6005681-DNA_D09	1	100	wt		wt			38	2.0	2/2	2-2/2-2
LP6005681-DNA_G11	1	100	wt		wt			41	2.0	2/2	2-2/2-2
LP6005681-DNA_E08	1	100	wt		wt			39	5.0	5/10	5-5/10-10
LP6005681-DNA_C09	1	100	wt		wt			44	2.0	2/2	2-2/2-2
LP6005681-DNA_E11	1	100	wt		wt			37	2.0	2/2	2-2/2-2
LP6005681-DNA_H09	1	100	wt		wt			40	2.0	2/5	2-2/5-5
LP6005681-DNA_A09	1	100	long		long			38	1.33333/3.0	8/423	8-8/390-457
LP6005681-DNA_C11	1	100	wt		wt			41	2.0	2/10	2-2/10-10
LP6005682-DNA_C07	1	100	wt		wt			39	2.0/5.0	2/5	2-2/5-5
LP6005682-DNA_E06	1	100	wt		wt			43	8.0	5/8	5-5/8-8
LP6005682-DNA_A06	1	100	wt		wt			46	1.33333/2.0	2/5	2-2/5-5
LP6005682-DNA_B07	1	100	wt		wt			42	2.0	2/5	2-2/5-5
LP6005681-DNA_F11	1	100	wt		wt			37	2.0	2/2	2-2/2-2
LP6005681-DNA_F08	1	100	wt		wt			38	2.0	2/2	2-2/2-2
LP6005681-DNA_G09	1	100	wt		wt			39	2.0	2/2	2-2/2-2
LP6005681-DNA_D12	1	100	wt		wt			37	2.0	2/2	2-2/2-2
LP6005681-DNA_B09	1	100	wt		wt			39	2.0	2/2	2-2/2-2
LP6005681-DNA_B11	1	100	wt		wt			34	2.0	2/11	2-2/11-11
LP6005681-DNA_E12	1	100	wt		wt			34	3.0/5.0	5/8	5-5/8-8
LP6005681-DNA_A12	1	100	wt		wt			35	2.0	2/2	2-2/2-2
LP6005682-DNA_H05	1	100	wt		wt			39	4.0	4/11	4-4/11-11
LP6005615-DNA_B11	1	100	wt		wt			52		2/12	2-2/12-12
LP6005681-DNA_A05	1	100	wt		wt			39	2.0	2/2	2-2/2-2
LP6005681-DNA_A06	1	100	wt		wt			36	2.0	2/2	2-2/2-2
LP6005681-DNA_C05	1	100	wt		wt			33	2.16667/4.0	4/6	4-4/6-6
LP6005681-DNA_C10	1	100	wt		wt			40	1.33333/5.0	5/5	5-5/5-5
LP6005681-DNA_D05	1	100	wt		wt			33	2.0	2/2	2-2/2-2
LP6005681-DNA_E06	1	100	wt		wt			39	2.0	2/2	2-2/2-2
LP6005681-DNA_F06	1	100	wt		wt			32	2.0	2/2	2-2/2-2
LP6005681-DNA_G06	1	100	wt		wt			34	1.33333	11/13	11-11/13-13
LP6005682-DNA_A08	1	100	wt		wt			39	2.0/2.33333	2/8	2-2/8-8
LP6005682-DNA_B01	1	100	wt		wt			44	5.0	2/5	2-2/5-5
LP6005682-DNA_B08	1	100	wt		wt			52	2.0	2/2	2-2/2-2
LP6005682-DNA_C01	1	100	wt		wt			41	2.0	2/2	2-2/2-2
LP6005681-DNA_B08	1	100	wt		wt			41	2.0/4.0	2/4	2-2/4-4
LP6005681-DNA_C08	1	100	wt		wt			40	2.0/5.0	2/5	2-2/5-5
LP6005681-DNA_D08	1	100	wt		wt			41	2.33333/8.0	2/8	2-2/8-8
LP6005681-DNA_D11	1	100	wt		wt			38	5.0	5/8	5-5/8-8
LP6005681-DNA_E05	1	100	wt		wt			35	2.0	2/2	2-2/2-2
LP6005681-DNA_E07	1	100	wt		wt			40	5.0/8.0	5/8	5-5/8-8
LP6005681-DNA_G12	1	100	wt		wt			34	5.0/8.0	5/8	5-5/8-8
LP6005681-DNA_H07	1	100	wt		wt			42	3.0/8.0	8/12	8-8/12-12
LP6005682-DNA_C06	1	100	wt		wt			49	4.0/5.0	4/5	4-4/5-5
LP6005682-DNA_D06	1	100	wt		wt			46	2.0	2/2	2-2/2-2
LP6005682-DNA_D07	1	100	wt		wt			42	2.0	2/2	2-2/2-2
LP6005682-DNA_E07	1	100	wt		wt			41	5.0	5/5	5-5/5-5
LP6005682-DNA_F06	1	100	wt		wt			47	5.0	5/5	5-5/5-5
LP6005682-DNA_F07	1	100	wt		wt			43	2.0/5.0	2/5	2-2/5-5
LP6005682-DNA_G06	1	100	wt		wt			43	1.33333/5.0	2/5	2-2/5-5
LP6005682-DNA_G07	1	100	wt		wt			38	2.0/2.33333	2/8	2-2/8-8
LP6005681-DNA_A01	1	100	wt		wt			33	2.0/2.33333	2/8	2-2/8-8
LP6005681-DNA_A02	1	100	wt		wt			37	2.0/6.0	2/6	2-2/6-6
LP6005681-DNA_A03	1	100	wt		wt			34	2.0	2/8	2-2/8-8
LP6005681-DNA_A04	1	100	wt		wt			35	2.0	2/2	2-2/2-2
LP6005681-DNA_A07	1	100	wt		wt			33	2.0/5.0	2/5	2-2/5-5
LP6005681-DNA_A10	1	100	wt		wt			35	4.0/5.0	4/5	4-4/5-5
LP6005681-DNA_A11	1	100	wt		wt			39	2.0/7.0	2/7	2-2/7-7
LP6005681-DNA_B01	1	100	wt		wt			37	2.0/8.0	2/8	2-2/8-8
LP6005681-DNA_B03	1	100	wt		wt			37	3.0/8.0	6/8	6-6/8-8
LP6005681-DNA_B04	1	100	wt		wt			33	2.0	2/2	2-2/2-2
LP6005681-DNA_B07	1	100	wt		wt			40	2.0	2/2	2-2/2-2
LP6005681-DNA_C01	1	100	wt		wt			36	2.0	2/2	2-2/2-2
LP6005681-DNA_C03	1	100	wt		wt			36		2/8	2-2/8-8
LP6005681-DNA_C04	1	100	wt		wt			33	2.0	2/5	2-2/5-5
LP6005681-DNA_C06	1	100	wt		wt			36	2.0	2/2	2-2/2-2
LP6005681-DNA_C07	1	100	wt		wt			37	2.0	2/5	2-2/5-5
LP6005681-DNA_D01	1	100	wt		wt			34	2.0/5.0	2/5	2-2/5-5
LP6005681-DNA_D03	1	100	wt		wt			36		2/2	2-2/2-2
LP6005681-DNA_D04	1	100	wt		wt			37	2.0	2/2	2-2/2-2
LP6005681-DNA_D06	1	100	wt		wt			39	4.0	4/8	4-4/8-8
LP6005681-DNA_E02	1	100	wt		wt			38	0.333333/2.0	2/12	2-2/12-12
LP6005681-DNA_E03	1	100	wt		wt			39	1.33333/2.0	2/6	2-2/6-6
LP6005681-DNA_F01	1	100	wt		wt			40	0.333333/2.0	2/18	2-2/16-20
LP6005681-DNA_F02	1	100	wt		wt			33	2.0/5.0	2/5	2-2/5-5
LP6005681-DNA_F03	1	100	wt		wt			33	2.0	2/2	2-2/2-2
LP6005681-DNA_F07	1	100	wt		wt			37	2.33333/8.0	8/12	8-8/12-12
LP6005681-DNA_F12	1	100	wt		wt			44	4.0	10/11	10-10/11-11
LP6005681-DNA_G01	1	100	wt		wt			36	2.0/6.0	2/6	2-2/6-6
LP6005681-DNA_G03	1	100	wt		wt			36	2.0	2/2	2-2/2-2
LP6005681-DNA_G05	1	100	wt		wt			40	2.0	2/2	2-2/2-2
LP6005681-DNA_G07	1	100	wt		wt			35	5.0	5/5	5-5/5-5
LP6005681-DNA_H02	1	100	wt		wt			37	2.0/3.0	2/5	2-2/5-5
LP6005681-DNA_H04	1	100	wt		wt			33	5.0/6.0	5/6	5-5/6-6
LP6005681-DNA_H05	1	100	wt		wt			36	2.0	2/2	2-2/2-2
LP6005681-DNA_H06	1	100	wt		wt			39	0.333333/2.0	2/11	2-2/11-11
LP6005681-DNA_H08	1	100	wt		wt			43	2.0	2/12	2-2/12-12
LP6005682-DNA_H07	1	100	wt		wt			43	2.0/6.0	2/6	2-2/6-6
LP6005616-DNA_D12	1	100	wt		wt			48	2.0/5.0	2/5	2-2/5-5
LP6005621-DNA_E02	1	100	wt		wt			45	2.0	2/8	2-2/8-8
LP6005621-DNA_G03	1	100	wt		wt			48	2.0	2/8	2-2/8-8
LP6005621-DNA_G05	1	100	wt		wt			41	2.0/5.0	2/5	2-2/5-5
LP6005616-DNA_F07	1	100	wt		wt			41	2.0/4.0	2/4	2-2/4-4
LP6005618-DNA_A10	1	100	wt		wt			43	2.0	2/2	2-2/2-2
LP6005618-DNA_B10	1	100	wt		wt			42	2.0	2/2	2-2/2-2
LP6005618-DNA_H05	1	100	wt		wt			43		8/17	8-8/16-18
LP6005620-DNA_A03	1	100	wt		wt			49	2.0/3.0	2/7	2-2/7-7
LP6005620-DNA_A05	1	100	wt		wt			41	2.0	2/11	2-2/11-11
LP6005620-DNA_A06	1	100	wt		wt			40	2.0/8.0	2/8	2-2/8-8
LP6005620-DNA_A07	1	100	wt		wt			39	2.0/5.0	2/5	2-2/5-5
LP6005620-DNA_A08	1	100	long		long			36	5.0	5/536	5-5/498-575
LP6005620-DNA_A09	1	100	wt		wt			52	2.0	2/2	2-2/2-2
LP6005620-DNA_A10	1	100	wt		wt			36	2.0	2/2	2-2/2-2
LP6005620-DNA_A11	1	100	wt		wt			55	2.33333	2/17	2-2/16-18
LP6005620-DNA_B06	1	100	wt		wt			37	2.0	2/2	2-2/2-2
LP6005620-DNA_B07	1	100	wt		wt			41	2.0	2/2	2-2/2-2
LP6005620-DNA_B08	1	100	wt		wt			39	2.0	2/2	2-2/2-2
LP6005620-DNA_B09	1	100	wt		wt			43	5.0	5/11	5-5/11-11
LP6005620-DNA_C06	1	100	wt		wt			35	3.0/5.0	2/5	2-2/5-5
LP6005620-DNA_C09	1	100	wt		wt			40	2.0/5.0	2/5	2-2/5-5
LP6005620-DNA_D05	1	100	long		long			38	2.0	2/205	2-2/182-228
LP6005620-DNA_D06	1	100	wt		wt			47	2.0/2.33333	2/10	2-2/10-10
LP6005620-DNA_D08	1	100	wt		wt			40	2.33333	8/15	8-8/15-15
LP6005620-DNA_D09	1	100	wt		wt			41	4.0/5.0	4/5	4-4/5-5
LP6005620-DNA_E06	1	100	wt		wt			39		8/8	8-8/8-8
LP6005620-DNA_E07	1	100	wt		wt			39	2.33333/8.0	8/10	8-8/10-10
LP6005620-DNA_F06	1	100	wt		wt			40		2/2	2-2/2-2
LP6005620-DNA_F09	1	100	wt		wt			36	2.0/6.0	2/6	2-2/6-6
LP6005620-DNA_G04	1	100	wt		wt			43	2.33333/7.0	2/7	2-2/7-7
LP6005620-DNA_G05	1	100	wt		wt			41	2.0/7.0	2/7	2-2/7-7
LP6005620-DNA_G06	1	100	wt		wt			43	2.0	2/2	2-2/2-2
LP6005620-DNA_G07	1	100	wt		wt			41	1.33333/2.0	2/5	2-2/5-5
LP6005620-DNA_G09	1	100	wt		wt			35	2.0	2/5	2-2/5-5
LP6005620-DNA_H05	1	100	wt		wt			37	2.0	2/2	2-2/2-2
LP6005620-DNA_H07	1	100	wt		wt			54	0.333333/5.0	5/10	5-5/10-10
LP6005620-DNA_H08	1	100	wt		wt			48	2.16667/4.0	2/4	2-2/4-4
LP6005620-DNA_H09	1	100	wt		wt			34	2.0	2/2	2-2/2-2
LP6005620-DNA_H10	1	100	wt		wt			43	2.0/5.0	2/5	2-2/5-5
LP6005621-DNA_E09	1	100	wt		wt			35		2/2	2-2/2-2
LP6005616-DNA_A06	1	100	wt		wt			45	2.0/4.0	2/4	2-2/4-4
LP6005616-DNA_A10	1	100	wt		wt			51	2.0/5.0	2/5	2-2/5-5
LP6005616-DNA_A11	1	100	wt		wt			39	2.0/4.0	2/4	2-2/4-4
LP6005616-DNA_B05	1	100	wt		wt			44	2.0	2/8	2-2/8-8
LP6005616-DNA_B06	1	100	wt		wt			47	2.0/7.0	2/7	2-2/7-7
LP6005616-DNA_B07	1	100	wt		wt			49	2.0/3.0	2/5	2-2/5-5
LP6005616-DNA_B10	1	100	wt		wt			54	2.33333/11.0	11/11	11-11/11-11
LP6005616-DNA_C05	1	100	wt		wt			45	5.0	2/5	2-2/5-5
LP6005616-DNA_C09	1	100	wt		wt			51	2.0/5.0	2/5	2-2/5-5
LP6005616-DNA_C11	1	100	wt		wt			53	2.0/5.0	2/5	2-2/5-5
LP6005616-DNA_D05	1	100	wt		wt			44	2.0	2/2	2-2/2-2
LP6005616-DNA_D06	1	100	wt		wt			37	2.0/5.0	2/5	2-2/5-5
LP6005616-DNA_E12	1	100	wt		wt			50	2.0	2/2	2-2/2-2
LP6005616-DNA_F04	1	100	wt		wt			45	3.0/8.33333	12/14	12-12/14-14
LP6005617-DNA_D02	1	100	wt		wt			53	2.0/3.0	2/13	2-2/13-13
LP6005621-DNA_B03	1	100	wt		wt			50	2.0/5.0	2/5	2-2/5-5
LP6005621-DNA_C02	1	100	wt		wt			40		5/8	5-5/8-8
LP6005621-DNA_F02	1	100	wt		wt			41	2.0	2/2	2-2/2-2
LP6005621-DNA_F09	1	100	wt		wt			48	2.0	2/2	2-2/2-2
LP6005621-DNA_H02	1	100	wt		wt			46	2.0/2.33333	2/4	2-2/4-4
LP6005621-DNA_H05	1	100	wt		wt			41	2.0	2/2	2-2/2-2
LP6005616-DNA_F05	1	100	wt		wt			45	0.333333/5.0	5/10	5-5/10-10
LP6005616-DNA_G09	1	100	wt		wt			52	2.0	2/2	2-2/2-2
LP6005616-DNA_G12	1	100	wt		wt			48	2.0	2/2	2-2/2-2
LP6005616-DNA_H05	1	100	wt		wt			46	2.0/3.0	2/2	2-2/2-2
LP6005616-DNA_H06	1	100	wt		wt			51	2.0	2/6	2-2/6-6
LP6005616-DNA_H07	1	100	wt		wt			49	2.0	2/2	2-2/2-2
LP6005616-DNA_H08	1	100	wt		wt			52	2.0/8.0	2/8	2-2/8-8
LP6005620-DNA_G01	1	100	wt		wt			44	2.0/8.0	2/8	2-2/8-8
LP6005620-DNA_H01	1	100	wt		wt			47	2.0	2/8	2-2/8-8
LP6005621-DNA_B08	1	100	wt		wt			42	2.0/6.0	2/6	2-2/6-6
LP6005621-DNA_G04	1	100	wt		wt			49	2.0	2/2	2-2/2-2
LP6005621-DNA_G08	1	100	wt		wt			49	2.33333/5.0	5/7	5-5/7-7
LP6005621-DNA_H07	1	100	wt		wt			42	1.33333/2.33333	2/7	2-2/7-7
LP6005621-DNA_H08	1	100	wt		wt			35	2.0	2/2	2-2/2-2
LP6005617-DNA_A01	1	100	wt		wt			46	2.0	2/8	2-2/8-8
LP6005618-DNA_A09	1	100	wt		wt			43	2.0	2/2	2-2/2-2
LP6005618-DNA_C10	1	100	wt		wt			43	2.0	2/2	2-2/2-2
LP6005618-DNA_E12	1	100	wt		wt			38	2.0/5.0	2/5	2-2/5-5
LP6005618-DNA_F09	1	100	wt		wt			44		2/2	2-2/2-2
LP6005620-DNA_D01	1	100	wt		wt			42		2/6	2-2/6-6
LP6005620-DNA_E01	1	100	wt		wt			43	2.0	2/6	2-2/6-6
LP6005620-DNA_F01	1	100	wt		wt			39	2.0	2/8	2-2/8-8
LP6005620-DNA_F02	1	100	wt		wt			43	2.0/5.0	2/5	2-2/5-5
LP6005620-DNA_F12	1	100	wt		wt			49	1.33333/2.0	2/5	2-2/5-5
LP6005620-DNA_G12	1	100	wt		wt			47	2.0/5.0	2/5	2-2/5-5
LP6005621-DNA_A01	1	100	wt		wt			53	8.0	6/8	6-6/8-8
LP6005621-DNA_A02	1	100	wt		wt			44	2.0/5.0	2/5	2-2/5-5
LP6005621-DNA_A08	1	100	wt		wt			41	2.0	2/2	2-2/2-2
LP6005621-DNA_B06	1	100	wt		wt			49	2.0/5.0	2/5	2-2/5-5
LP6005621-DNA_G01	1	100	wt		wt			50	2.0/5.0	2/5	2-2/5-5
LP6005621-DNA_H01	1	100	wt		wt			46	2.0/6.0	2/6	2-2/6-6
LP6005615-DNA_G10	1	100	wt		wt			44	2.0	2/2	2-2/2-2
LP6005616-DNA_B11	1	100	wt		wt			52	2.0	2/2	2-2/2-2
LP6005620-DNA_A12	1	100	wt		wt			42	1.33333/5.0	5/5	5-5/5-5
LP6005620-DNA_B11	1	100	wt		wt			44	5.0	2/5	2-2/5-5
LP6005620-DNA_B12	1	100	wt		wt			45	2.0/5.0	2/5	2-2/5-5
LP6005620-DNA_D11	1	100	wt		wt			33	2.0	2/8	2-2/8-8
LP6005620-DNA_E03	1	100	wt		wt			50	2.0	2/2	2-2/2-2
LP6005620-DNA_E08	1	100	wt		wt			36	5.0	5/5	5-5/5-5
LP6005620-DNA_F03	1	100	wt		wt			53	2.33333/5.0	5/8	5-5/8-8
LP6005620-DNA_F04	1	100	wt		wt			45	3.0/5.0	5/12	5-5/12-12
LP6005620-DNA_F08	1	100	wt		wt			36	2.0	2/2	2-2/2-2
LP6005620-DNA_H11	1	100	wt		wt			41	1.33333/5.0	5/8	5-5/8-8
LP6005615-DNA_H11	1	100	wt		wt			47	8.0	8/9	8-8/9-9
LP6005616-DNA_A12	1	100	wt		wt			50	2.0/2.33333	2/10	2-2/10-10
LP6005616-DNA_B08	1	100	wt		wt			49	2.0/5.0	2/5	2-2/5-5
LP6005616-DNA_B12	1	100	wt		wt			54	1.33333/5.0	5/5	5-5/5-5
LP6005616-DNA_C06	1	100	wt		wt			40	8.0	8/10	8-8/10-10
LP6005616-DNA_C07	1	100	wt		wt			49	2.0	2/2	2-2/2-2
LP6005616-DNA_C08	1	100	wt		wt			48	2.0/8.0	2/8	2-2/8-8
LP6005616-DNA_D08	1	100	wt		wt			50	2.0/5.0	2/5	2-2/5-5
LP6005616-DNA_D09	1	100	wt		wt			48	2.0	2/5	2-2/5-5
LP6005616-DNA_E09	1	100	wt		wt			49	2.0	2/8	2-2/8-8
LP6005616-DNA_F08	1	100	wt		wt			48	3.0/8.0	8/12	8-8/12-13
LP6005616-DNA_F09	1	100	wt		wt			52	2.0/4.0	2/4	2-2/4-4
LP6005616-DNA_G04	1	100	wt		wt			43	8.0	2/8	2-2/8-8
LP6005616-DNA_G05	1	100	wt		wt			47	2.0/5.0	2/5	2-2/5-5
LP6005616-DNA_G08	1	100	wt		wt			51	2.0	2/2	2-2/2-2
LP6005616-DNA_H09	1	100	wt		wt			52	2.0	2/8	2-2/8-8
LP6005618-DNA_D10	1	100	wt		wt			42	2.0	2/2	2-2/2-2
LP6005618-DNA_F12	1	100	wt		wt			39	5.0/8.0	5/8	5-5/8-8
LP6005618-DNA_G08	1	100	wt		wt			45	3.0	2/8	2-2/8-8
LP6005618-DNA_G12	1	100	wt		wt			43	4.0/5.0	4/5	4-4/5-5
LP6005620-DNA_B02	1	100	wt		wt			49	3.0/5.0	2/5	2-2/5-5
LP6005620-DNA_C02	1	100	wt		wt			50	3.0	6/8	6-6/8-8
LP6005620-DNA_C12	1	100	wt		wt			52	2.0	2/10	2-2/10-10
LP6005620-DNA_D12	1	100	wt		wt			46	2.0	2/2	2-2/2-2
LP6005620-DNA_E12	1	100	wt		wt			49	2.0	2/11	2-2/11-11
LP6005681-DNA_A08	1	100	wt		wt			35	9.0	8/12	8-8/12-12
LP6005681-DNA_B02	1	100	wt		wt			38	2.0/5.0	2/5	2-2/5-5
LP6005681-DNA_B05	1	100	wt		wt			38	2.0/5.0	2/5	2-2/5-5
LP6005681-DNA_C02	1	100	wt		wt			37	2.0/10.0	2/10	2-2/10-10
LP6005681-DNA_D02	1	100	wt		wt			33	2.0/5.0	2/5	2-2/5-5
LP6005681-DNA_E04	1	100	wt		wt			33	2.0	2/2	2-2/2-2
LP6005681-DNA_F04	1	100	wt		wt			34	5.0	5/6	5-5/6-6
LP6005681-DNA_G02	1	100	wt		wt			39	2.0	2/2	2-2/2-2
LP6005681-DNA_G04	1	100	wt		wt			33		2/2	2-2/2-2
LP6005681-DNA_G08	1	100	wt		wt			37	8.0	8/11	8-8/10-13
LP6005681-DNA_H03	1	100	wt		wt			38	2.0	2/2	2-2/2-2
LP6005682-DNA_A01	1	100	wt		wt			43	2.0/5.0	2/5	2-2/5-5
LP6005869-DNA_E03	1	100	wt		wt			45	0.333333/8.0	8/8	8-8/8-8
LP6005874-DNA_C10	1	100	wt		wt			47	2.0	2/11	2-2/11-11
LP6005874-DNA_D07	1	100	wt		wt			48	0.333333/8.0	8/8	8-8/8-8
LP6005874-DNA_B02	1	100	wt		wt			49	2.0	2/8	2-2/8-8
LP6005874-DNA_D02	1	100	wt		wt			46	5.0	2/5	2-2/5-5
LP6005874-DNA_C07	1	100	wt		wt			47	2.0/4.33333	2/10	2-2/10-10
LP6005874-DNA_F01	1	100	wt		wt			43	2.33333/3.0	8/11	8-8/11-12
LP6005874-DNA_E02	1	100	wt		wt			46	2.0	2/2	2-2/2-2
LP6005871-DNA_C11	1	100	wt		wt			48	2.0	2/2	2-2/2-2
LP6005874-DNA_H01	1	100	wt		wt			48	2.0/2.33333	2/10	2-2/10-10
LP6005874-DNA_C02	1	100	wt		wt			47	2.0	2/8	2-2/8-8
LP6005871-DNA_G08	1	100	wt		wt			48	2.0	2/2	2-2/2-2
LP6005869-DNA_G01	1	100	wt		wt			42	3.0/8.0	2/8	2-2/8-8
LP6005871-DNA_B11	1	100	wt		wt			47	2.0/5.0	2/5	2-2/5-5
LP6005871-DNA_A08	1	100	wt		wt			43	2.0/4.0	2/4	2-2/4-4
LP6005874-DNA_B10	1	100	wt		wt			47	2.0/5.0	2/5	2-2/5-5
LP6005871-DNA_D08	1	100	wt		wt			49	2.0/3.0	2/2	2-2/2-2
LP6005874-DNA_E01	1	100	wt		wt			41	5.0	2/5	2-2/5-5
LP6005874-DNA_D10	1	100	wt		wt			46	5.0	5/8	5-5/8-8
LP6005874-DNA_E10	1	100	wt		wt			44	1.33333/5.0	5/8	5-5/8-8
LP6005874-DNA_A10	1	100	wt		wt			42	4.0/5.0	4/5	4-4/5-5
LP6005871-DNA_F08	1	100	wt		wt			46	2.0	2/2	2-2/2-2
LP6005874-DNA_A02	1	100	wt		wt			49	1.33333/3.0	5/8	5-5/8-8
LP6005874-DNA_F02	1	100	wt		wt			44		2/11	2-2/11-11
LP6005869-DNA_H01	1	100	wt		wt			46	1.33333/5.0	5/6	5-5/6-6
LP6005869-DNA_C03	1	100	wt		wt			44	2.33333/3.0	2/8	2-2/8-8
LP6005869-DNA_B01	1	100	wt		wt			43	1.33333/2.0	2/6	2-2/6-6
LP6005869-DNA_F01	1	100	wt		wt			39	2.0	2/2	2-2/2-2
LP6005869-DNA_B03	1	100	wt		wt			45	2.0/5.0	2/5	2-2/5-5
LP6005869-DNA_C01	1	100	wt		wt			50	5.0	2/5	2-2/5-5
LP6005871-DNA_A11	1	100	wt		wt			49	5.0	2/5	2-2/5-5
LP6005869-DNA_D01	1	100	wt		wt			46	1.33333/8.0	2/8	2-2/8-8
LP6005874-DNA_A03	1	100	wt		wt			47	2.0	2/2	2-2/2-2
LP6005874-DNA_G08	1	100	wt		wt			44	2.0	2/2	2-2/2-2
LP6005874-DNA_E06	1	100	wt		wt			44	2.0	2/2	2-2/2-2
LP6005874-DNA_D04	1	100	wt		wt			39	2.0	2/2	2-2/2-2
LP6005874-DNA_B07	1	100	wt		wt			46	2.0/6.0	2/6	2-2/6-6
LP6005874-DNA_D05	1	100	wt		wt			41	1.33333	6/8	6-6/8-8
LP6005874-DNA_A06	1	100	wt		wt			45	0.333333	5/6	5-5/6-6
LP6005874-DNA_C01	1	100	wt		wt			44	2.0/6.0	2/6	2-2/6-6
LP6005874-DNA_G05	1	100	wt		wt			44	2.0	2/8	2-2/8-8
LP6005874-DNA_H05	1	100	wt		wt			42	2.0	2/2	2-2/2-2
LP6005874-DNA_H06	1	100	wt		wt			45	2.0	2/8	2-2/8-8
LP6005874-DNA_B06	1	100	wt		wt			44	2.33333/7.0	6/7	6-6/7-7
LP6005874-DNA_D01	1	100	wt		wt			41	2.0/5.0	2/5	2-2/5-5
LP6005874-DNA_C05	1	100	wt		wt			44	2.0/4.33333	2/10	2-2/10-10
LP6005874-DNA_B04	1	100	wt		wt			44	2.0	2/2	2-2/2-2
LP6005874-DNA_C04	1	100	wt		wt			43	2.0	2/8	2-2/8-8
LP6005874-DNA_A07	1	100	wt		wt			48	3.0	5/7	5-5/7-7
LP6005874-DNA_F06	1	100	wt		wt			43	2.0/8.0	2/8	2-2/8-8
LP6005874-DNA_B01	1	100	wt		wt			44	2.0	2/2	2-2/2-2
LP6005874-DNA_D06	1	100	wt		wt			49	10.0	2/10	2-2/10-10
LP6005874-DNA_H08	1	100	wt		wt			42	2.0	2/2	2-2/2-2
LP6005874-DNA_E09	1	100	wt		wt			48	2.0	2/2	2-2/2-2
LP6005874-DNA_E04	1	100	wt		wt			36	2.0/5.0	2/5	2-2/5-5
LP6005874-DNA_F05	1	100	wt		wt			41	8.0	8/8	8-8/8-8
LP6005874-DNA_G06	1	100	wt		wt			45	2.0	2/8	2-2/8-8
LP6005874-DNA_B09	1	100	wt		wt			47	2.0	2/2	2-2/2-2
LP6005872-DNA_E02	1	100	wt		wt			49	7.0/8.0	7/8	7-7/8-8
LP6005871-DNA_D11	1	100	wt		wt			48	5.0/8.0	5/8	5-5/8-8
LP6005872-DNA_H11	1	100	wt		wt			35	2.33333/4.0	4/11	4-4/11-11
LP6005871-DNA_H11	1	100	wt		wt			45	2.0/5.0	2/5	2-2/5-5
LP6005874-DNA_F07	1	100	wt		wt			43	6.0	2/6	2-2/6-6
LP6005872-DNA_C04	1	100	wt		wt			47	2.0/5.0	2/5	2-2/5-5
LP6005874-DNA_H11	1	100	wt		wt			42	2.0/2.33333	2/8	2-2/8-8
LP6005874-DNA_D12	1	100	wt		wt			40	2.0	2/2	2-2/2-2
LP6005874-DNA_D09	1	100	wt		wt			47		2/12	2-2/12-12
LP6005871-DNA_E11	1	100	wt		wt			46	2.0	2/2	2-2/2-2
LP6005874-DNA_G11	1	100	wt		wt			41		2/5	2-2/5-5
LP6005874-DNA_E08	1	100	wt		wt			42	2.0/5.0	2/5	2-2/5-5
LP6005871-DNA_D07	1	100	wt		wt			51	2.0/8.0	2/8	2-2/8-8
LP6005872-DNA_E03	1	100	wt		wt			53	2.0	2/5	2-2/5-5
LP6005874-DNA_C12	1	100	wt		wt			42	2.0/6.0	2/6	2-2/6-6
LP6005872-DNA_B04	1	100	wt		wt			52	2.0	2/8	2-2/8-8
LP6005874-DNA_D08	1	100	wt		wt			43	2.0/6.0	2/6	2-2/6-6
LP6005872-DNA_B03	1	100	wt		wt			45	0.333333/3.0	2/6	2-2/6-6
LP6005872-DNA_D11	1	100	wt		wt			48	2.0	2/2	2-2/2-2
LP6005872-DNA_F02	1	100	wt		wt			49	2.0	2/2	2-2/2-2
LP6005871-DNA_F10	1	100	wt		wt			49	1.33333/5.0	5/6	5-5/6-6
LP6005872-DNA_H02	1	100	wt		wt			48	2.0	2/2	2-2/2-2
LP6005874-DNA_A12	1	100	wt		wt			43	0.333333/2.33333	10/14	10-10/14-14
LP6005871-DNA_G11	1	100	wt		wt			46	1.33333/5.0	4/5	4-4/5-5
LP6005872-DNA_D03	1	100	wt		wt			49	2.0	2/2	2-2/2-2
LP6005871-DNA_F11	1	100	wt		wt			41	2.0/5.0	2/5	2-2/5-5
LP6005872-DNA_A04	1	100	wt		wt			51	2.16667/5.0	5/20	5-5/17-23
LP6005871-DNA_E07	1	100	wt		wt			49	2.0/5.0	2/5	2-2/5-5
LP6005872-DNA_D02	1	100	wt		wt			50	5.0	5/5	5-5/5-5
LP6005874-DNA_H12	1	100	wt		wt			43		8/10	8-8/10-10
LP6005872-DNA_D04	1	100	wt		wt			44		5/6	5-5/6-6
LP6005871-DNA_H07	1	100	wt		wt			47		2/10	2-2/10-10
LP6005872-DNA_E01	1	100	wt		wt			46	2.0	2/2	2-2/2-2
LP6005871-DNA_C09	1	100	wt		wt			47	5.0	2/5	2-2/5-5
LP6005872-DNA_A02	1	100	wt		wt			50	4.33333/5.0	5/10	5-5/10-10
LP6005871-DNA_G07	1	100	wt		wt			47	3.0/8.0	2/8	2-2/8-8
LP6005872-DNA_B01	1	100	wt		wt			48	2.0	2/2	2-2/2-2
LP6005871-DNA_H08	1	100	wt		wt			49	2.0/9.0	2/9	2-2/9-9
LP6005871-DNA_G10	1	100	wt		wt			48	2.0/5.0	2/5	2-2/5-5
LP6005871-DNA_C10	1	100	wt		wt			51	5.0	5/14	5-5/14-14
LP6005871-DNA_B08	1	100	wt		wt			45	1.33333/2.0	2/5	2-2/5-5
LP6005872-DNA_F09	1	100	wt		wt			45	1.33333	2/6	2-2/6-6
LP6005872-DNA_D01	1	100	wt		wt			47	1.33333/5.0	5/8	5-5/8-8
LP6005874-DNA_H07	1	100	long		long			40		2/480	2-2/447-516
LP6005872-DNA_H01	1	100	long		long			47	2.0	2/319	2-2/294-344
LP6005872-DNA_C01	1	100	wt		wt			51	0.333333	2/13	2-2/13-13
LP6005871-DNA_F07	1	100	wt		wt			48	2.0	2/2	2-2/2-2
LP6005871-DNA_E10	1	100	wt		wt			49	2.0	2/11	2-2/11-11
LP6005874-DNA_C09	1	100	wt		wt			46	2.0/5.0	2/5	2-2/5-5
LP6005872-DNA_F11	1	100	wt		wt			53	8.0	2/8	2-2/8-8
LP6005872-DNA_G02	1	100	wt		wt			47	2.0/5.0	2/5	2-2/5-5
LP6005871-DNA_B09	1	100	wt		wt			49	0.333333/2.0	2/8	2-2/8-8
LP6005874-DNA_A08	1	100	wt		wt			42	3.0/6.0	2/6	2-2/6-6
LP6005872-DNA_G11	1	100	wt		wt			51	2.0	2/2	2-2/2-2
LP6005872-DNA_G09	1	100	wt		wt			47	3.16667/5.0	5/5	5-5/5-5
LP6005872-DNA_A01	1	100	wt		wt			46	2.0	2/2	2-2/2-2
LP6005872-DNA_E04	1	100	wt		wt			44	2.0	2/2	2-2/2-2
LP6005871-DNA_G05	1	100	wt		wt			46	2.0/5.0	2/5	2-2/5-5
LP6005873-DNA_D01	1	100	wt		wt			47	1.33333/5.0	5/17	5-5/16-18
LP6005869-DNA_A03	1	100	wt		wt			43	2.0	2/2	2-2/2-2
LP6005869-DNA_A07	1	100	wt		wt			44	2.0/6.0	2/6	2-2/6-6
LP6005869-DNA_C07	1	100	wt		wt			41	2.33333/8.0	6/8	6-6/8-8
LP6005869-DNA_D03	1	100	wt		wt			48	2.0	2/2	2-2/2-2
LP6005869-DNA_E12	1	100	wt		wt			44	2.0	2/9	2-2/9-9
LP6005869-DNA_F03	1	100	wt		wt			45	2.0/3.0	2/10	2-2/10-10
LP6005869-DNA_F12	1	100	wt		wt			44	2.0	2/8	2-2/8-8
LP6005869-DNA_G12	1	100	wt		wt			43	2.0	2/2	2-2/2-2
LP6005869-DNA_H12	1	100	wt		wt			44	2.0/6.0	2/6	2-2/6-6
LP6005871-DNA_A01	1	100	wt		wt			46	5.0	5/5	5-5/5-5
LP6005871-DNA_A04	1	100	wt		wt			53	2.0	2/8	2-2/8-8
LP6005871-DNA_A05	1	100	wt		wt			46	2.0	2/8	2-2/8-8
LP6005871-DNA_B01	1	100	wt		wt			50	2.0	2/2	2-2/2-2
LP6005871-DNA_B04	1	100	wt		wt			50	0.333333	5/13	5-5/13-13
LP6005871-DNA_B05	1	100	wt		wt			48	2.0	2/6	2-2/6-6
LP6005871-DNA_C05	1	100	wt		wt			47	1.33333	12/12	12-12/12-12
LP6005871-DNA_C07	1	100	wt		wt			49	5.0	2/5	2-2/5-5
LP6005871-DNA_D04	1	100	wt		wt			46	2.0	2/2	2-2/2-2
LP6005871-DNA_D05	1	100	wt		wt			47	2.0	2/2	2-2/2-2
LP6005871-DNA_E04	1	100	wt		wt			47	2.0	2/2	2-2/2-2
LP6005871-DNA_E05	1	100	wt		wt			46	2.0	2/8	2-2/8-8
LP6005871-DNA_F03	1	100	wt		wt			48	2.0	2/2	2-2/2-2
LP6005871-DNA_F05	1	100	wt		wt			46	2.0/5.0	2/5	2-2/5-5
LP6005871-DNA_G03	1	100	wt		wt			47	2.0	2/2	2-2/2-2
LP6005871-DNA_H03	1	100	wt		wt			47	1.33333/5.0	2/5	2-2/5-5
LP6005873-DNA_C02	1	100	wt		wt			56	2.0	2/2	2-2/2-2
LP6005873-DNA_E01	1	100	wt		wt			44	2.0/5.0	2/5	2-2/5-5
LP6005873-DNA_E03	1	100	wt		wt			34	6.0	6/8	6-6/8-8
LP6005873-DNA_F01	1	100	wt		wt			42		2/5	2-2/5-5
LP6005869-DNA_A01	1	100	wt		wt			46	2.0/8.0	2/8	2-2/8-8
LP6005869-DNA_A02	1	100	wt		wt			46	2.0	2/2	2-2/2-2
LP6005869-DNA_A06	1	100	wt		wt			38	2.0/8.0	2/8	2-2/8-8
LP6005869-DNA_A12	1	100	wt		wt			40	2.0	2/2	2-2/2-2
LP6005869-DNA_B02	1	100	wt		wt			49	2.0	2/2	2-2/2-2
LP6005869-DNA_B05	1	100	wt		wt			44		5/19	5-5/16-21
LP6005869-DNA_B06	1	100	wt		wt			43	2.0/10.0	2/10	2-2/10-10
LP6005869-DNA_B12	1	100	wt		wt			43	2.0	2/2	2-2/2-2
LP6005869-DNA_C02	1	100	wt		wt			47	2.0	2/2	2-2/2-2
LP6005869-DNA_C06	1	100	wt		wt			43	5.0	5/8	5-5/8-8
LP6005869-DNA_C12	1	100	wt		wt			42	4.0/5.0	4/5	4-4/5-5
LP6005869-DNA_D02	1	100	wt		wt			48	2.0	2/2	2-2/2-2
LP6005869-DNA_D05	1	100	wt		wt			42	2.0	2/2	2-2/2-2
LP6005869-DNA_D06	1	100	wt		wt			47	2.33333/3.0	10/11	10-10/11-11
LP6005869-DNA_D07	1	100	wt		wt			39	2.0/5.0	2/5	2-2/5-5
LP6005869-DNA_D12	1	100	wt		wt			37	2.0/3.0	2/2	2-2/2-2
LP6005869-DNA_E01	1	100	wt		wt			49	3.0/7.0	2/7	2-2/7-7
LP6005869-DNA_E02	1	100	wt		wt			46	3.0/7.0	7/8	7-7/8-8
LP6005869-DNA_E05	1	100	wt		wt			43	2.0	2/5	2-2/5-5
LP6005869-DNA_E06	1	100	wt		wt			46	5.0/6.0	5/6	5-5/6-6
LP6005869-DNA_F02	1	100	wt		wt			41	2.0	2/2	2-2/2-2
LP6005869-DNA_F05	1	100	wt		wt			40	3.0/5.0	2/5	2-2/5-5
LP6005869-DNA_F06	1	100	wt		wt			45	5.0	5/8	5-5/8-8
LP6005869-DNA_F07	1	100	wt		wt			42	2.0	2/8	2-2/8-8
LP6005869-DNA_G06	1	100	wt		wt			47	2.0	2/2	2-2/2-2
LP6005869-DNA_G07	1	100	wt		wt			48	2.0/3.0	2/8	2-2/8-8
LP6005869-DNA_H02	1	100	wt		wt			41	4.0/5.0	4/5	4-4/5-5
LP6005869-DNA_H03	1	100	wt		wt			41		2/5	2-2/5-5
LP6005869-DNA_H06	1	100	wt		wt			45	2.0	2/2	2-2/2-2
LP6005869-DNA_H07	1	100	wt		wt			48	3.0/8.0	2/8	2-2/8-8
LP6005869-DNA_H11	1	100	wt		wt			39	4.0	2/4	2-2/4-4
LP6005871-DNA_C08	1	100	wt		wt			49	2.0	2/6	2-2/6-6
LP6005871-DNA_E08	1	100	wt		wt			34		8/17	8-8/16-18
LP6005872-DNA_A09	1	100	wt		wt			46	2.0/5.0	2/5	2-2/5-5
LP6005872-DNA_D12	1	100	wt		wt			35	3.0	2/6	2-2/6-6
LP6005873-DNA_A06	1	100	wt		wt			46	2.0/10.0	2/10	2-2/10-10
LP6005873-DNA_A07	1	100	wt		wt			48	2.0	2/2	2-2/2-2
LP6005873-DNA_A08	1	100	wt		wt			49	2.0	2/2	2-2/2-2
LP6005873-DNA_A09	1	100	wt		wt			43	2.0	2/2	2-2/2-2
LP6005873-DNA_B03	1	100	wt		wt			41	2.0	2/2	2-2/2-2
LP6005873-DNA_B06	1	100	wt		wt			52		2/23	2-2/19-26
LP6005873-DNA_B08	1	100	wt		wt			54	2.0/8.0	2/8	2-2/8-8
LP6005873-DNA_B10	1	100	wt		wt			33	2.0	2/11	2-2/11-11
LP6005873-DNA_C08	1	100	wt		wt			53	2.0/4.33333	2/12	2-2/12-12
LP6005873-DNA_C09	1	100	wt		wt			50	1.33333/5.0	5/6	5-5/6-6
LP6005873-DNA_C10	1	100	wt		wt			51	2.33333/5.0	5/8	5-5/8-8
LP6005873-DNA_C11	1	100	wt		wt			38	2.33333	8/10	8-8/10-10
LP6005873-DNA_D07	1	100	wt		wt			53	2.0	2/2	2-2/2-2
LP6005873-DNA_D09	1	100	wt		wt			50	2.33333/3.0	2/8	2-2/8-8
LP6005873-DNA_D10	1	100	wt		wt			51		5/5	5-5/5-5
LP6005873-DNA_E02	1	100	wt		wt			46	3.0/5.0	2/5	2-2/5-5
LP6005873-DNA_E07	1	100	wt		wt			43	1.33333/2.0	2/7	2-2/7-7
LP6005873-DNA_E09	1	100	wt		wt			52	6.0	2/6	2-2/6-6
LP6005873-DNA_F02	1	100	wt		wt			46	2.16667/4.0	2/4	2-2/4-4
LP6005873-DNA_F04	1	100	wt		wt			54	3.0/6.0	2/6	2-2/6-6
LP6005873-DNA_F07	1	100	wt		wt			38	0.333333/2.0	2/8	2-2/8-8
LP6005873-DNA_F08	1	100	wt		wt			52	1.33333/3.0	2/8	2-2/8-8
LP6005873-DNA_F10	1	100	wt		wt			49	2.33333/5.0	5/8	5-5/8-8
LP6005873-DNA_G02	1	100	wt		wt			50	2.0	2/2	2-2/2-2
LP6005873-DNA_G03	1	100	wt		wt			47	2.0/8.0	2/8	2-2/8-8
LP6005873-DNA_G07	1	100	wt		wt			52	8.0	8/8	8-8/8-8
LP6005873-DNA_G10	1	100	wt		wt			45	2.0	2/9	2-2/9-9
LP6005873-DNA_H03	1	100	wt		wt			52	1.16667/2.0	2/2	2-2/2-2
LP6005873-DNA_H07	1	100	wt		wt			51	2.0	2/5	2-2/5-5
LP6005873-DNA_H08	1	100	wt		wt			45	3.0/5.0	2/5	2-2/5-5
LP6005873-DNA_H09	1	100	wt		wt			44	2.0	2/2	2-2/2-2
LP6005871-DNA_D10	1	100	wt		wt			50	2.0	2/2	2-2/2-2
LP6005871-DNA_E09	1	100	wt		wt			33	1.33333	2/6	2-2/6-6
LP6005871-DNA_G09	1	100	wt		wt			44	2.0/8.0	2/8	2-2/8-8
LP6005872-DNA_B09	1	100	wt		wt			52	2.0	2/2	2-2/2-2
LP6005872-DNA_E12	1	100	wt		wt			51	1.33333	6/10	6-6/10-10
LP6005872-DNA_F12	1	100	wt		wt			51	3.0/4.0	4/6	4-4/6-6
LP6005872-DNA_G12	1	100	wt		wt			49	1.33333/5.0	5/8	5-5/8-8
LP6005872-DNA_H12	1	100	wt		wt			53	2.0	2/2	2-2/2-2
LP6005873-DNA_A03	1	100	wt		wt			49	2.0/5.0	2/5	2-2/5-5
LP6005873-DNA_A05	1	100	wt		wt			42	0.333333/2.0	2/6	2-2/6-6
LP6005873-DNA_B01	1	100	wt		wt			44	2.0	2/5	2-2/5-5
LP6005873-DNA_B02	1	100	wt		wt			35		2/8	2-2/8-8
LP6005873-DNA_B04	1	100	wt		wt			56	2.0	2/2	2-2/2-2
LP6005873-DNA_B05	1	100	wt		wt			44	3.0	2/12	2-2/12-12
LP6005873-DNA_C01	1	100	wt		wt			45	2.0	2/2	2-2/2-2
LP6005873-DNA_C04	1	100	wt		wt			55	0.333333/5.0	5/20	5-5/17-23
LP6005873-DNA_C05	1	100	wt		wt			40	2.0	2/2	2-2/2-2
LP6005873-DNA_D02	1	100	wt		wt			52	2.0	2/2	2-2/2-2
LP6005873-DNA_D04	1	100	wt		wt			55	3.0/5.0	2/5	2-2/5-5
LP6005873-DNA_E04	1	100	wt		wt			57	2.0/5.0	2/5	2-2/5-5
LP6005873-DNA_F05	1	100	wt		wt			54		2/2	2-2/2-2
LP6005873-DNA_G04	1	100	wt		wt			53		2/8	2-2/8-8
LP6005873-DNA_H02	1	100	wt		wt			47		2/2	2-2/2-2
LP6005873-DNA_H04	1	100	wt		wt			53	2.0/5.0	2/5	2-2/5-5
LP6005874-DNA_B12	1	100	wt		wt			41	2.0	2/2	2-2/2-2
LP6005874-DNA_E07	1	100	wt		wt			38	2.0/7.0	2/7	2-2/7-7
LP6005874-DNA_F09	1	100	wt		wt			40	2.0	2/8	2-2/8-8
LP6005874-DNA_G12	1	100	wt		wt			34	5.0/8.0	5/8	5-5/8-8
LP6005874-DNA_H04	1	100	wt		wt			40	5.0	2/5	2-2/5-5
LP6005869-DNA_A05	1	100	wt		wt			46	2.33333	8/8	8-8/8-8
LP6005869-DNA_C10	1	100	wt		wt			44	2.0/5.0	2/5	2-2/5-5
LP6005869-DNA_G05	1	100	wt		wt			46	2.0/4.33333	2/10	2-2/10-10
LP6005869-DNA_H05	1	100	wt		wt			40	2.0	2/5	2-2/5-5
LP6005869-DNA_H09	1	100	wt		wt			44	2.0	2/2	2-2/2-2
LP6005871-DNA_G04	1	100	wt		wt			38	2.0	2/2	2-2/2-2
LP6005871-DNA_H04	1	100	wt		wt			48	2.0/5.0	2/5	2-2/5-5
LP6005873-DNA_A01	1	100	wt		wt			50	5.0	5/5	5-5/5-5
LP6005873-DNA_A11	1	100	wt		wt			62	0.333333/3.0	2/8	2-2/8-8
LP6005873-DNA_B11	1	100	wt		wt			47	1.33333	8/8	8-8/8-8
LP6005873-DNA_C03	1	100	wt		wt			51	2.0	2/11	2-2/11-11
LP6005873-DNA_E05	1	100	wt		wt			49	2.0	2/2	2-2/2-2
LP6005873-DNA_E06	1	100	long		long			50	0.333333/5.0	5/230	5-5/209-250
LP6005873-DNA_F06	1	100	wt		wt			54	3.0/8.0	8/8	8-8/8-8
LP6005873-DNA_F09	1	100	wt		wt			49	5.0	5/7	5-5/7-7
LP6005873-DNA_G01	1	100	wt		wt			46	5.0	2/5	2-2/5-5
LP6005873-DNA_G09	1	100	wt		wt			47	2.0	2/2	2-2/2-2
LP6005873-DNA_H01	1	100	wt		wt			45	3.0/5.0	2/5	2-2/5-5
LP6005873-DNA_H10	1	100	wt		wt			49	2.0/5.0	2/5	2-2/5-5
LP6005873-DNA_H11	1	100	wt		wt			44	3.0/5.0	5/12	5-5/12-12
LP6005874-DNA_A01	1	100	wt		wt			41	8.0	2/8	2-2/8-8
LP6005874-DNA_A04	1	100	long		long			47	0.333333/2.0	2/207	2-2/187-226
LP6005874-DNA_A05	1	100	wt		wt			45	2.0/2.33333	2/8	2-2/8-8
LP6005874-DNA_B03	1	100	wt		wt			45	4.33333/5.0	5/10	5-5/10-10
LP6005874-DNA_B11	1	100	wt		wt			41	0.333333	2/10	2-2/10-10
LP6005874-DNA_C08	1	100	wt		wt			47	2.0	2/2	2-2/2-2
LP6005874-DNA_D03	1	100	wt		wt			41	1.33333	5/8	5-5/8-8
LP6005874-DNA_E03	1	100	wt		wt			38	2.0	2/2	2-2/2-2
LP6005874-DNA_F03	1	100	wt		wt			42	2.0	2/11	2-2/11-11
LP6005874-DNA_G01	1	100	wt		wt			42	2.0/5.0	2/5	2-2/5-5
LP6005874-DNA_G04	1	100	wt		wt			38	2.0/8.0	2/8	2-2/8-8
LP6005874-DNA_G09	1	100	wt		wt			44	1.33333/5.0	5/8	5-5/8-8
LP6005871-DNA_B07	1	100	wt		wt			44	2.0	2/2	2-2/2-2
LP6005871-DNA_C12	1	100	wt		wt			49		2/19	2-2/17-21
LP6005872-DNA_A06	1	100	wt		wt			51	2.33333/8.0	8/11	8-8/11-11
LP6005872-DNA_A10	1	100	wt		wt			54	2.0	2/2	2-2/2-2
LP6005872-DNA_B06	1	100	wt		wt			54	2.0/2.33333	2/2	2-2/2-2
LP6005872-DNA_B07	1	100	wt		wt			52	1.33333/5.0	5/6	5-5/6-6
LP6005872-DNA_B08	1	100	wt		wt			55	2.0	2/2	2-2/2-2
LP6005872-DNA_B10	1	100	wt		wt			52	2.0	2/12	2-2/12-12
LP6005872-DNA_C07	1	100	wt		wt			51	1.33333/2.0	2/7	2-2/7-7
LP6005872-DNA_C10	1	100	wt		wt			48	2.0	2/8	2-2/8-8
LP6005872-DNA_D08	1	100	wt		wt			48	2.33333	8/11	8-8/11-11
LP6005872-DNA_E08	1	100	wt		wt			45	2.0/5.0	2/5	2-2/5-5
LP6005872-DNA_F05	1	100	wt		wt			48	2.0/8.0	2/8	2-2/8-8
LP6005872-DNA_F07	1	100	wt		wt			50	2.0	2/2	2-2/2-2
LP6005872-DNA_F08	1	100	wt		wt			45	2.0	2/2	2-2/2-2
LP6005872-DNA_F10	1	100	wt		wt			49	2.0/5.0	2/5	2-2/5-5
LP6005872-DNA_G04	1	100	wt		wt			50	2.0/8.0	2/8	2-2/8-8
LP6005872-DNA_G08	1	100	wt		wt			38	5.0	2/5	2-2/5-5
LP6005872-DNA_G10	1	100	wt		wt			46	2.0/8.0	2/8	2-2/8-8
LP6005872-DNA_H03	1	100	wt		wt			49	2.0/5.0	2/5	2-2/5-5
LP6005872-DNA_H05	1	100	wt		wt			48	0.333333/2.0	2/6	2-2/6-6
LP6005872-DNA_H08	1	100	wt		wt			48	2.0	2/2	2-2/2-2
LP6005872-DNA_H09	1	100	wt		wt			49	2.0	2/2	2-2/2-2
LP6005874-DNA_A09	1	100	wt		wt			42	2.0	2/9	2-2/9-9
LP6005871-DNA_B12	1	100	wt		wt			45	5.0	2/5	2-2/5-5
LP6005871-DNA_E12	1	100	wt		wt			50	2.0	2/2	2-2/2-2
LP6005871-DNA_G12	1	100	wt		wt			50	2.0	2/2	2-2/2-2
LP6005871-DNA_H12	1	100	long		long			51	3.0/5.0	5/278	5-5/256-300
LP6005872-DNA_A05	1	100	wt		wt			49	2.0	2/2	2-2/2-2
LP6005872-DNA_A07	1	100	wt		wt			48	2.0/6.0	2/6	2-2/6-6
LP6005872-DNA_B02	1	100	wt		wt			52	2.0	2/13	2-2/13-13
LP6005872-DNA_B05	1	100	wt		wt			44	5.0	5/5	5-5/5-5
LP6005872-DNA_C02	1	100	wt		wt			47	2.0	2/9	2-2/9-9
LP6005872-DNA_C05	1	100	wt		wt			50	3.0/5.0	2/5	2-2/5-5
LP6005872-DNA_D05	1	100	wt		wt			45	2.0	2/2	2-2/2-2
LP6005872-DNA_D07	1	100	wt		wt			51	2.0	2/6	2-2/6-6
LP6005872-DNA_E05	1	100	wt		wt			48	1.33333	2/5	2-2/5-5
LP6005872-DNA_E07	1	100	wt		wt			48	2.0/3.0	2/13	2-2/13-13
LP6005872-DNA_E09	1	100	wt		wt			51	2.0/2.33333	2/8	2-2/8-8
LP6005872-DNA_F03	1	100	wt		wt			50	2.0/6.0	2/6	2-2/6-6
LP6005872-DNA_F04	1	100	wt		wt			54	5.0/7.33333	5/14	5-5/14-14
LP6005872-DNA_G03	1	100	wt		wt			48	0.333333/5.0	5/11	5-5/11-11
LP6005872-DNA_G05	1	100	wt		wt			49	5.0	5/8	5-5/8-8
LP6005872-DNA_G07	1	100	wt		wt			51	10.0	10/18	10-10/16-19
LP6005872-DNA_H04	1	100	wt		wt			34	2.33333	8/8	8-8/8-8
LP6005874-DNA_G10	1	100	wt		wt			46	2.0/5.0	2/5	2-2/5-5
LP6005874-DNA_H03	1	100	wt		wt			42	2.0/6.0	2/6	2-2/6-6
LP6005874-DNA_H10	1	100	wt		wt			46	2.0/6.0	2/6	2-2/6-6
LP6005869-DNA_A04	1	100	wt		wt			49	5.0	2/5	2-2/5-5
LP6005869-DNA_A09	1	100	wt		wt			40	3.0/7.0	5/7	5-5/7-7
LP6005869-DNA_A11	1	100	wt		wt			44	2.0	2/2	2-2/2-2
LP6005869-DNA_B04	1	100	wt		wt			50	2.0	2/2	2-2/2-2
LP6005869-DNA_B11	1	100	wt		wt			45	2.0/7.0	2/7	2-2/7-7
LP6005869-DNA_C04	1	100	wt		wt			48	1.33333/5.0	2/5	2-2/5-5
LP6005869-DNA_C09	1	100	wt		wt			40	2.0/3.0	2/2	2-2/2-2
LP6005869-DNA_C11	1	100	wt		wt			49	3.0/10.0	5/10	5-5/10-10
LP6005869-DNA_D09	1	100	wt		wt			49	2.0/8.0	2/8	2-2/8-8
LP6005869-DNA_D11	1	100	wt		wt			49	2.33333	2/8	2-2/8-8
LP6005869-DNA_E09	1	100	wt		wt			45	2.0	2/2	2-2/2-2
LP6005869-DNA_F11	1	100	wt		wt			45	2.0	2/2	2-2/2-2
LP6005869-DNA_G08	1	100	wt		wt			44	2.0	2/2	2-2/2-2
LP6005869-DNA_G09	1	100	wt		wt			43	5.33333/11.0	5/11	5-5/11-11
LP6005869-DNA_G11	1	100	wt		wt			42	2.0/5.0	2/5	2-2/5-5
LP6005869-DNA_H08	1	100	wt		wt			43	2.0	2/2	2-2/2-2
LP6005869-DNA_H10	1	100	wt		wt			41	0.333333/4.0	7/10	7-7/10-10
LP6005871-DNA_A02	1	100	wt		wt			42	2.0	2/2	2-2/2-2
LP6005871-DNA_A06	1	100	wt		wt			47	2.0	2/2	2-2/2-2
LP6005871-DNA_A07	1	100	wt		wt			46	2.0	2/2	2-2/2-2
LP6005871-DNA_B06	1	100	long		long			45	2.0/2.33333	2/162	2-2/145-180
LP6005871-DNA_C01	1	100	wt		wt			51	1.33333/2.33333	5/8	5-5/8-8
LP6005871-DNA_C06	1	100	wt		wt			43	2.0/5.0	2/5	2-2/5-5
LP6005871-DNA_D01	1	100	wt		wt			47	5.0	2/5	2-2/5-5
LP6005871-DNA_D06	1	100	wt		wt			40		9/10	9-9/10-10
LP6005871-DNA_E06	1	100	wt		wt			45	1.33333/5.0	5/8	5-5/8-8
LP6005871-DNA_F06	1	100	wt		wt			43	8.0	8/11	8-8/11-11
LP6005871-DNA_H05	1	100	wt		wt			46	2.0	2/2	2-2/2-2
LP6005871-DNA_H06	1	100	wt		wt			45	5.0	2/5	2-2/5-5
LP6005869-DNA_D04	1	100	wt		wt			45	2.0	2/2	2-2/2-2
LP6005869-DNA_D08	1	100	wt		wt			38	2.0/8.0	2/8	2-2/8-8
LP6005869-DNA_E08	1	100	wt		wt			42		8/10	8-8/10-10
LP6005869-DNA_E10	1	100	wt		wt			44	2.0	2/2	2-2/2-2
LP6005869-DNA_F08	1	100	wt		wt			43	2.33333/11.0	2/11	2-2/11-11
LP6005869-DNA_F10	1	100	wt		wt			44	2.0/5.0	2/5	2-2/5-5
LP6005869-DNA_G10	1	100	wt		wt			42	2.0	2/8	2-2/8-8
LP6005871-DNA_A03	1	100	wt		wt			45	2.0/5.0	2/5	2-2/5-5
LP6005871-DNA_A10	1	100	wt		wt			45	2.0/6.0	2/6	2-2/6-6
LP6005871-DNA_B03	1	100	wt		wt			48	2.0/5.0	2/5	2-2/5-5
LP6005871-DNA_B10	1	100	wt		wt			44	1.33333/2.0	2/11	2-2/11-11
LP6005871-DNA_C02	1	100	wt		wt			50	2.0	2/2	2-2/2-2
LP6005871-DNA_C03	1	100	wt		wt			47	3.0	2/5	2-2/5-5
LP6005871-DNA_D02	1	100	wt		wt			46	0.333333/4.0	4/18	4-4/16-19
LP6005871-DNA_E02	1	100	wt		wt			45	2.0	2/2	2-2/2-2
LP6005871-DNA_F02	1	100	wt		wt			48	1.33333/5.0	2/5	2-2/5-5
LP6005871-DNA_H02	1	100	long		long			42	2.0	2/209	2-2/187-230
LP6005871-DNA_H09	1	100	wt		wt			45	2.0/5.0	2/5	2-2/5-5
LP6005872-DNA_A12	1	100	wt		wt			53	2.0	2/2	2-2/2-2
LP6005872-DNA_B11	1	100	wt		wt			51	2.0	2/2	2-2/2-2
LP6005872-DNA_H10	1	100	wt		wt			48	2.0	2/2	2-2/2-2
LP6005873-DNA_C12	1	100	wt		wt			40	2.0	2/2	2-2/2-2
LP6005873-DNA_D12	1	100	wt		wt			40	2.33333	8/17	8-8/16-18
LP6005874-DNA_G07	1	100	wt		wt			43	2.0	2/2	2-2/2-2
LP6005872-DNA_D10	1	100	wt		wt			46	1.16667/5.0	5/5	5-5/5-5
LP6005869-DNA_E04	1	100	wt		wt			43	3.0/7.0	7/7	7-7/7-7
LP6005872-DNA_H06	1	100	wt		wt			48	2.0	2/5	2-2/5-5
LP6005871-DNA_E03	1	100	wt		wt			45	3.0/5.0	2/5	2-2/5-5
LP6005872-DNA_D09	1	100	wt		wt			55	1.33333/3.0	2/10	2-2/10-10
LP6005872-DNA_C06	1	100	wt		wt			52	4.0	2/4	2-2/4-4
LP6005872-DNA_A11	1	100	wt		wt			51	2.0	2/2	2-2/2-2
LP6005872-DNA_E10	1	100	wt		wt			49	2.0/8.0	2/8	2-2/8-8
LP6005871-DNA_G06	1	100	wt		wt			42	2.0	2/2	2-2/2-2
LP6005871-DNA_G01	1	100	wt		wt			45	5.0	2/5	2-2/5-5
LP6005869-DNA_B08	1	100	wt		wt			45	0.333333/7.0	2/7	2-2/7-7
LP6005871-DNA_H01	1	100	wt		wt			44	2.33333	8/13	8-8/13-13
LP6005874-DNA_F08	1	100	wt		wt			42	2.0/4.0	2/4	2-2/4-4
LP6005869-DNA_D10	1	100	wt		wt			45	2.0	2/2	2-2/2-2
LP6005874-DNA_C06	1	100	wt		wt			47	2.0	2/2	2-2/2-2
LP6005872-DNA_C11	1	100	wt		wt			53	2.0/6.0	2/6	2-2/6-6
LP6005871-DNA_E01	1	100	wt		wt			46	2.0	2/8	2-2/8-8
LP6005872-DNA_F06	1	100	wt		wt			52	1.33333	8/8	8-8/8-8
LP6005869-DNA_H04	1	100	wt		wt			42	1.33333/5.0	2/5	2-2/5-5
LP6005871-DNA_A09	1	100	wt		wt			47	2.0/5.0	2/5	2-2/5-5
LP6005872-DNA_E06	1	100	wt		wt			53	2.0	2/2	2-2/2-2
LP6005869-DNA_C08	1	100	wt		wt			41	2.0	2/2	2-2/2-2
LP6005869-DNA_A08	1	100	wt		wt			46	3.0	2/7	2-2/7-7
LP6005871-DNA_F01	1	100	wt		wt			45	1.33333/2.0	2/13	2-2/13-13
LP6005872-DNA_D06	1	100	wt		wt			53	2.0	2/2	2-2/2-2
LP6005869-DNA_F04	1	100	wt		wt			48	2.0	2/2	2-2/2-2
LP6005871-DNA_D03	1	100	wt		wt			50	2.0	2/2	2-2/2-2
LP6005871-DNA_F04	1	100	wt		wt			44	2.0	2/7	2-2/7-7
LP6005871-DNA_G02	1	100	wt		wt			46	2.0	2/13	2-2/13-13
LP6005873-DNA_A04	1	100	wt		wt			43	2.0/8.0	2/8	2-2/8-8
LP6005873-DNA_A10	1	100	wt		wt			48	5.0	5/5	5-5/5-5
LP6005873-DNA_A12	1	100	wt		wt			47	2.0	2/2	2-2/2-2
LP6005873-DNA_B12	1	100	wt		wt			51	5.0	5/7	5-5/7-7
LP6005873-DNA_C06	1	100	wt		wt			43	2.0	2/2	2-2/2-2
LP6005873-DNA_C07	1	100	wt		wt			50	1.33333/3.0	7/13	7-7/13-13
LP6005873-DNA_D06	1	100	wt		wt			48	2.0	2/2	2-2/2-2
LP6005873-DNA_E11	1	100	wt		wt			46	4.0	2/4	2-2/4-4
LP6005873-DNA_E12	1	100	wt		wt			45	3.0	2/8	2-2/8-8
LP6005873-DNA_F03	1	100	wt		wt			33	2.0/5.0	2/5	2-2/5-5
LP6005873-DNA_F11	1	100	wt		wt			39	2.0	2/8	2-2/8-8
LP6005873-DNA_G12	1	100	wt		wt			48	2.0/5.0	2/5	2-2/5-5
LP6005873-DNA_H06	1	100	wt		wt			45	2.0	2/2	2-2/2-2
LP6005874-DNA_A11	1	100	wt		wt			43	2.0	2/2	2-2/2-2
LP6005874-DNA_B08	1	100	wt		wt			47	2.0	2/12	2-2/12-12
LP6005874-DNA_C11	1	100	wt		wt			46	2.0	2/2	2-2/2-2
LP6005874-DNA_D11	1	100	wt		wt			42	6.0/8.0	6/8	6-6/8-8
LP6005874-DNA_F10	1	100	wt		wt			43	2.0	2/2	2-2/2-2
LP6005874-DNA_F12	1	100	wt		wt			42	2.0	2/2	2-2/2-2
LP6005874-DNA_G03	1	100	wt		wt			49	2.0/3.0	2/8	2-2/8-8
LP6005875-DNA_A05	1	100	wt		wt			51	2.0/8.0	2/8	2-2/8-8
LP6005875-DNA_B04	1	100	wt		wt			46	2.0	2/2	2-2/2-2
LP6005875-DNA_C01	1	100	wt		wt			50	2.16667/5.0	4/5	4-4/5-5
LP6005875-DNA_D04	1	100	wt		wt			37	2.0	2/8	2-2/8-8
LP6005875-DNA_E02	1	100	wt		wt			35	2.0/6.0	2/6	2-2/6-6
LP6005875-DNA_F06	1	100	wt		wt			50	2.0	2/2	2-2/2-2
LP6005875-DNA_G03	1	100	wt		wt			48	2.0	2/2	2-2/2-2
LP6005875-DNA_G04	1	100	wt		wt			52	2.0	2/2	2-2/2-2
LP6005875-DNA_G06	1	100	wt		wt			49	2.0	2/2	2-2/2-2
LP6005875-DNA_H01	1	100	wt		wt			35	3.0	10/17	10-10/16-18
LP6005876-DNA_A02	1	100	wt		wt			50	2.0/5.0	2/5	2-2/5-5
LP6005876-DNA_A04	1	100	wt		wt			40	2.0/8.0	2/8	2-2/8-8
LP6005876-DNA_B02	1	100	wt		wt			54		2/8	2-2/8-8
LP6005876-DNA_B04	1	100	wt		wt			39	3.0/8.0	8/8	8-8/8-8
LP6005876-DNA_B05	1	100	wt		wt			48	2.0/6.0	2/6	2-2/6-6
LP6005876-DNA_C01	1	100	long		long			47	2.0	2/259	2-2/237-282
LP6005876-DNA_C02	1	100	wt		wt			46	2.0/3.0	2/2	2-2/2-2
LP6005876-DNA_C04	1	100	wt		wt			44	2.0	2/13	2-2/13-13
LP6005876-DNA_D01	1	100	wt		wt			50	2.0	2/2	2-2/2-2
LP6005876-DNA_D02	1	100	wt		wt			44	2.33333/5.0	5/8	5-5/8-8
LP6005876-DNA_D04	1	100	wt		wt			41	2.0/8.0	2/8	2-2/8-8
LP6005876-DNA_D05	1	100	wt		wt			51	1.33333/3.0	8/12	8-8/12-12
LP6005876-DNA_E02	1	100	wt		wt			47	2.0	2/2	2-2/2-2
LP6005876-DNA_E04	1	100	wt		wt			47	2.0/2.33333	2/8	2-2/8-8
LP6005876-DNA_E05	1	100	wt		wt			46	2.0	2/2	2-2/2-2
LP6005876-DNA_F01	1	100	wt		wt			47	2.0	2/2	2-2/2-2
LP6005876-DNA_F02	1	100	wt		wt			43		8/12	8-8/12-12
LP6005876-DNA_F03	1	100	wt		wt			44	2.0	2/8	2-2/8-8
LP6005876-DNA_F05	1	100	wt		wt			45	2.0	2/2	2-2/2-2
LP6005876-DNA_G01	1	100	wt		wt			48	2.0/8.0	2/8	2-2/8-8
LP6005876-DNA_G02	1	100	wt		wt			47	2.0/2.33333	2/8	2-2/8-8
LP6005876-DNA_G03	1	100	wt		wt			40	2.0/5.0	2/5	2-2/5-5
LP6005876-DNA_H09	1	100	wt		wt			45	2.0/4.0	2/4	2-2/4-4
LP6005876-DNA_H08	1	100	wt		wt			49	2.0	2/2	2-2/2-2
LP6005876-DNA_H05	1	100	wt		wt			47	2.0/5.0	2/5	2-2/5-5
LP6005876-DNA_G07	1	100	wt		wt			49	5.0	2/5	2-2/5-5
LP6005876-DNA_F08	1	100	wt		wt			49	2.0	2/2	2-2/2-2
LP6005876-DNA_F07	1	100	wt		wt			49		5/10	5-5/10-10
LP6005876-DNA_F06	1	100	wt		wt			51	2.0/2.33333	2/18	2-2/16-19
LP6005876-DNA_E08	1	100	wt		wt			46	2.0/5.0	2/5	2-2/5-5
LP6005876-DNA_E07	1	100	wt		wt			48	2.0	2/2	2-2/2-2
LP6005876-DNA_D09	1	100	wt		wt			50	2.33333/8.0	6/8	6-6/8-8
LP6005876-DNA_D08	1	100	long		long			47	1.33333	186/357	17-206/167-383
LP6005876-DNA_D07	1	100	long		long			47	5.0	5/260	5-5/238-282
LP6005876-DNA_D06	1	100	wt		wt			50		2/8	2-2/8-8
LP6005876-DNA_C09	1	100	wt		wt			52	5.0	2/5	2-2/5-5
LP6005876-DNA_C08	1	100	wt		wt			47	5.0	2/5	2-2/5-5
LP6005876-DNA_C06	1	100	wt		wt			48	3.0	4/6	4-4/6-6
LP6005876-DNA_B09	1	100	wt		wt			50	2.0	2/8	2-2/8-8
LP6005876-DNA_B08	1	100	wt		wt			46	2.33333	2/8	2-2/8-8
LP6005876-DNA_B07	1	100	wt		wt			46	5.33333	8/11	8-8/11-11
LP6005876-DNA_A10	1	100	wt		wt			46	1.33333/6.0	6/10	6-6/10-10
LP6005876-DNA_A08	1	100	wt		wt			45		7/8	7-7/8-8
LP6005876-DNA_A07	1	100	wt		wt			44	5.0	2/5	2-2/5-5
LP6005876-DNA_A06	1	100	wt		wt			46	2.0	2/10	2-2/10-10
LP6005875-DNA_H07	1	100	wt		wt			48	2.16667/5.0	5/5	5-5/5-5
LP6005875-DNA_G07	1	100	wt		wt			49	0.333333/2.33333	5/11	5-5/11-11
LP6005875-DNA_D08	1	100	wt		wt			49	3.0/5.0	5/8	5-5/8-8
LP6005875-DNA_D05	1	100	wt		wt			49	4.0	4/5	4-4/5-5
LP6005875-DNA_C09	1	100	wt		wt			52	2.0	2/8	2-2/8-8
LP6005875-DNA_C05	1	100	wt		wt			45	5.0/6.33333	5/12	5-5/12-12
LP6005875-DNA_B09	1	100	wt		wt			33	2.0	2/2	2-2/2-2
LP6005875-DNA_B08	1	100	wt		wt			46	3.0	7/11	7-7/11-11
LP6005875-DNA_B05	1	100	wt		wt			47	3.0	8/15	8-8/15-15
LP6005875-DNA_A08	1	100	wt		wt			49	2.0	2/2	2-2/2-2
LP6005875-DNA_A01	1	100	wt		wt			52	0.333333/2.0	2/10	2-2/10-10
LP6005875-DNA_A02	1	100	wt		wt			43	2.0	2/2	2-2/2-2
LP6005875-DNA_A03	1	100	wt		wt			48	1.33333/6.0	5/6	5-5/6-6
LP6005875-DNA_A06	1	100	wt		wt			51	2.0	2/2	2-2/2-2
LP6005875-DNA_B01	1	100	wt		wt			51	2.0/5.0	2/5	2-2/5-5
LP6005875-DNA_B06	1	100	wt		wt			52	2.0/8.0	2/8	2-2/8-8
LP6005875-DNA_C06	1	100	wt		wt			54	1.33333/3.0	6/8	6-6/8-8
LP6005875-DNA_D01	1	100	long		long			49	1.33333/2.0	2/327	2-2/302-351
LP6005875-DNA_D02	1	100	wt		wt			48	2.0/2.33333	2/8	2-2/8-8
LP6005875-DNA_D06	1	100	wt		wt			53	2.0/8.0	2/8	2-2/8-8
LP6005875-DNA_E01	1	100	wt		wt			47	2.0	2/2	2-2/2-2
LP6005875-DNA_E03	1	100	wt		wt			50	5.0	2/5	2-2/5-5
LP6005875-DNA_E04	1	100	wt		wt			51	5.0/6.0	5/6	5-5/6-6
LP6005875-DNA_E05	1	100	wt		wt			51	2.0/5.0	2/5	2-2/5-5
LP6005875-DNA_F01	1	100	wt		wt			50	1.33333/5.0	5/12	5-5/12-12
LP6005875-DNA_F02	1	100	wt		wt			54	5.0	5/11	5-5/11-11
LP6005875-DNA_F03	1	100	wt		wt			51	2.33333/8.0	8/11	8-8/11-11
LP6005875-DNA_F05	1	100	long		long			51	2.33333	8/264	8-8/243-286
LP6005875-DNA_G01	1	100	wt		wt			48	2.0	2/2	2-2/2-2
LP6005875-DNA_G02	1	100	wt		wt			52	2.33333/8.0	8/8	8-8/8-8
LP6005875-DNA_H02	1	100	wt		wt			53	4.0/5.0	4/5	4-4/5-5
LP6005875-DNA_H04	1	100	wt		wt			50	2.0	2/2	2-2/2-2
LP6005875-DNA_H05	1	100	wt		wt			35	2.0/4.0	2/4	2-2/4-4
LP6005876-DNA_D03	1	100	wt		wt			45	2.0	2/2	2-2/2-2
LP6005875-DNA_A04	1	100	wt		wt			47	2.33333/8.0	8/10	8-8/10-10
LP6005875-DNA_A09	1	100	wt		wt			43	2.0	2/2	2-2/2-2
LP6005875-DNA_C04	1	100	wt		wt			52	2.0	2/2	2-2/2-2
LP6005875-DNA_H03	1	100	wt		wt			50	2.0	2/6	2-2/6-6
LP6005875-DNA_H08	1	100	wt		wt			45	2.0/5.0	2/5	2-2/5-5
LP6005876-DNA_A03	1	100	wt		wt			43	5.0/8.0	5/8	5-5/8-8
LP6005876-DNA_A11	1	100	wt		wt			42	2.0	2/5	2-2/5-5
LP6005876-DNA_B03	1	100	wt		wt			41	1.33333/2.0	2/10	2-2/10-10
LP6005876-DNA_C03	1	100	wt		wt			44		2/8	2-2/8-8
LP6005876-DNA_C05	1	100	wt		wt			36	5.0/8.0	5/8	5-5/8-8
LP6005876-DNA_E11	1	100	wt		wt			47	5.33333	8/10	8-8/10-10
LP6005876-DNA_F11	1	100	long		long			46	2.0/2.33333	2/38	2-2/31-45
LP6005876-DNA_G10	1	100	wt		wt			42	2.0	2/2	2-2/2-2
LP6005876-DNA_G12	1	100	wt		wt			47	4.0	2/4	2-2/4-4
LP6005876-DNA_H10	1	100	wt		wt			41	2.0	2/2	2-2/2-2
LP6005876-DNA_H12	1	100	wt		wt			49	5.0	5/10	5-5/10-10
LP6005877-DNA_A06	1	100	wt		wt			46	2.33333/5.0	5/8	5-5/8-8
LP6005877-DNA_A08	1	100	wt		wt			45	1.33333/5.0	5/10	5-5/10-10
LP6005877-DNA_B06	1	100	wt		wt			48	2.0	2/2	2-2/2-2
LP6005877-DNA_B07	1	100	wt		wt			41		2/2	2-2/2-2
LP6005877-DNA_B08	1	100	wt		wt			48	2.0	2/2	2-2/2-2
LP6005877-DNA_C06	1	100	wt		wt			49	2.0	2/2	2-2/2-2
LP6005877-DNA_C07	1	100	wt		wt			51	2.0/6.0	2/6	2-2/6-6
LP6005877-DNA_D05	1	100	long		long			45	2.0	2/55	2-2/46-65
LP6005877-DNA_D07	1	100	wt		wt			53	2.0/3.0	2/5	2-2/5-5
LP6005877-DNA_E05	1	100	wt		wt			48	2.33333/3.0	2/7	2-2/7-7
LP6005877-DNA_E06	1	100	wt		wt			42		8/10	8-8/10-10
LP6005877-DNA_F07	1	100	wt		wt			49	2.0/5.0	2/5	2-2/5-5
LP6005877-DNA_G05	1	100	wt		wt			47	1.33333/5.0	2/5	2-2/5-5
LP6005877-DNA_G07	1	100	wt		wt			47	1.33333/5.0	2/5	2-2/5-5
LP6005877-DNA_G08	1	100	wt		wt			38	3.0	2/7	2-2/7-7
LP6005877-DNA_H05	1	100	wt		wt			47	2.33333/10.0	8/10	8-8/10-10
LP6005877-DNA_C08	1	100	wt		wt			45	2.0	2/2	2-2/2-2
LP6005877-DNA_D08	1	100	wt		wt			43	1.33333/6.0	6/8	6-6/8-8
LP6005877-DNA_E08	1	100	wt		wt			45	1.33333/3.0	2/6	2-2/6-6
LP6005875-DNA_H12	1	100	long		long			47		5/577	5-5/543-611
LP6005875-DNA_H11	1	100	wt		wt			55	3.0/6.0	6/8	6-6/8-8
LP6005875-DNA_H10	1	100	wt		wt			44		2/11	2-2/11-11
LP6005876-DNA_C12	1	100	wt		wt			44	2.0	2/2	2-2/2-2
LP6005875-DNA_E09	1	100	wt		wt			52	2.0/6.0	2/6	2-2/6-6
LP6005875-DNA_F10	1	100	wt		wt			39		2/2	2-2/2-2
LP6005875-DNA_G09	1	100	wt		wt			53	2.0/5.0	2/5	2-2/5-5
LP6005875-DNA_E12	1	100	wt		wt			50	2.0	2/2	2-2/2-2
LP6005875-DNA_D10	1	100	wt		wt			46	0.333333/6.0	2/6	2-2/6-6
LP6005875-DNA_E11	1	100	wt		wt			52	2.0	2/2	2-2/2-2
LP6005875-DNA_A12	1	100	wt		wt			52	2.0	2/8	2-2/8-8
LP6005875-DNA_C12	1	100	wt		wt			52	2.0	2/2	2-2/2-2
LP6005875-DNA_B10	1	100	wt		wt			48	2.16667/4.33333	2/12	2-2/12-12
LP6005875-DNA_H09	1	100	wt		wt			53	2.0	2/2	2-2/2-2
LP6005875-DNA_D12	1	100	wt		wt			53	2.0/5.0	2/5	2-2/5-5
LP6005875-DNA_F12	1	100	wt		wt			47	0.333333/2.0	2/6	2-2/6-6
LP6005877-DNA_D02	1	100	wt		wt			44	2.0	2/2	2-2/2-2
LP6005877-DNA_C01	1	100	wt		wt			46	2.0/6.0	2/6	2-2/6-6
LP6005877-DNA_B03	1	100	wt		wt			45	5.0	5/5	5-5/5-5
LP6005877-DNA_E02	1	100	wt		wt			47	1.33333/2.0	2/5	2-2/5-5
LP6005877-DNA_G02	1	100	wt		wt			45	2.0	2/2	2-2/2-2
LP6005877-DNA_F04	1	100	wt		wt			52	1.33333/5.0	5/5	5-5/5-5
LP6005877-DNA_A04	1	100	wt		wt			46	2.0	2/2	2-2/2-2
LP6005877-DNA_H04	1	100	wt		wt			50	5.0	5/5	5-5/5-5
LP6005877-DNA_H01	1	100	wt		wt			41	2.0/5.0	2/5	2-2/5-5
LP6005877-DNA_F02	1	100	wt		wt			46	2.0/3.0	2/2	2-2/2-2
LP6005877-DNA_E01	1	100	wt		wt			47	2.0	2/19	2-2/16-21
LP6005875-DNA_G08	1	100	wt		wt			34	1.33333/3.0	2/6	2-2/6-6
LP6005877-DNA_G03	1	100	wt		wt			46	2.0	2/2	2-2/2-2
LP6005877-DNA_A02	1	100	wt		wt			49	3.0/5.0	2/5	2-2/5-5
LP6005877-DNA_G04	1	100	wt		wt			53	2.0	2/2	2-2/2-2
LP6005877-DNA_H02	1	100	wt		wt			43	1.33333/3.0	2/10	2-2/10-10
LP6005877-DNA_G01	1	100	wt		wt			42	2.0	2/2	2-2/2-2
LP6005877-DNA_H03	1	100	wt		wt			47		6/13	6-6/13-13
LP6005877-DNA_D04	1	100	wt		wt			49	5.0	5/5	5-5/5-5
LP6005875-DNA_A11	1	100	wt		wt			44	3.0/4.0	4/17	4-4/16-18
LP6005877-DNA_C03	1	100	wt		wt			45	2.0/5.0	2/5	2-2/5-5
LP6005877-DNA_A01	1	100	wt		wt			45	3.0/4.0	4/10	4-4/10-10
LP6005877-DNA_B02	1	100	wt		wt			44	1.33333/3.0	2/6	2-2/6-6
LP6005877-DNA_F01	1	100	wt		wt			45	5.0/8.0	5/8	5-5/8-8
LP6005876-DNA_A09	1	100	wt		wt			52	2.0/5.0	2/5	2-2/5-5
LP6005875-DNA_C03	1	100	wt		wt			51	2.0	2/6	2-2/6-6
LP6005876-DNA_E10	1	100	wt		wt			48	2.0/5.0	2/5	2-2/5-5
LP6005876-DNA_E09	1	100	wt		wt			47	2.0/8.0	2/8	2-2/8-8
LP6005876-DNA_G08	1	100	wt		wt			48	1.33333/6.0	2/6	2-2/6-6
LP6005876-DNA_G05	1	100	wt		wt			50	2.0/8.0	2/8	2-2/8-8
LP6005876-DNA_C10	1	100	wt		wt			53	2.33333/8.0	2/8	2-2/8-8
LP6005876-DNA_D10	1	100	wt		wt			35	2.0	2/5	2-2/5-5
LP6005875-DNA_B07	1	100	wt		wt			39	2.0/5.0	2/5	2-2/5-5
LP6005876-DNA_A05	1	100	wt		wt			43		2/8	2-2/8-8
LP6005875-DNA_E06	1	100	wt		wt			34		8/18	8-8/16-20
LP6005875-DNA_F08	1	100	wt		wt			52	2.0	2/2	2-2/2-2
LP6005876-DNA_B06	1	100	wt		wt			48	2.0	2/2	2-2/2-2
LP6005876-DNA_F04	1	100	wt		wt			48	2.0/2.33333	2/8	2-2/8-8
LP6005875-DNA_D03	1	100	wt		wt			48	2.0/5.0	2/5	2-2/5-5
LP6005876-DNA_B12	1	100	wt		wt			45	2.0/5.0	2/5	2-2/5-5
LP6005875-DNA_C07	1	100	wt		wt			52	2.0	2/17	2-2/16-18
LP6005876-DNA_B11	1	100	wt		wt			47	2.0	2/2	2-2/2-2
LP6005876-DNA_H06	1	100	wt		wt			48	5.0	5/8	5-5/8-8
LP6005876-DNA_E06	1	100	wt		wt			51	2.0/5.0	2/5	2-2/5-5
LP6005876-DNA_H11	1	100	wt		wt			47	2.0	2/10	2-2/10-10
LP6005876-DNA_G06	1	100	wt		wt			47	2.0	2/2	2-2/2-2
LP6005876-DNA_A12	1	100	wt		wt			45	2.0	2/2	2-2/2-2
LP6005876-DNA_F09	1	100	wt		wt			48	2.0/8.0	2/8	2-2/8-8
LP6005875-DNA_E08	1	100	wt		wt			49	2.0/8.0	2/8	2-2/8-8
LP6005876-DNA_B10	1	100	wt		wt			51	1.33333/8.0	8/10	8-8/10-10
LP6005875-DNA_B03	1	100	wt		wt			47	3.0/8.0	8/8	8-8/8-8
LP6005876-DNA_G04	1	100	wt		wt			45	7.0	2/7	2-2/7-7
LP6005876-DNA_G09	1	100	wt		wt			45	2.0	2/2	2-2/2-2
LP6005876-DNA_G11	1	100	wt		wt			49	2.0/5.0	2/5	2-2/5-5
LP6005875-DNA_C02	1	100	wt		wt			41	2.0	2/8	2-2/8-8
LP6005875-DNA_C08	1	100	wt		wt			44	2.0/6.0	2/6	2-2/6-6
LP6005877-DNA_D06	1	100	wt		wt			33	2.0	2/8	2-2/8-8
LP6005877-DNA_E07	1	100	wt		wt			46	2.0	2/13	2-2/13-13
LP6005877-DNA_F05	1	100	wt		wt			35	2.0	2/2	2-2/2-2
LP6005877-DNA_F08	1	100	wt		wt			42	2.0	2/2	2-2/2-2
LP6005875-DNA_B12	1	100	wt		wt			49	2.0/5.0	2/5	2-2/5-5
LP6005875-DNA_F09	1	100	wt		wt			51	2.0	2/2	2-2/2-2
LP6005876-DNA_C07	1	100	wt		wt			48	2.0	2/2	2-2/2-2
LP6005876-DNA_C11	1	100	wt		wt			34	2.0	2/2	2-2/2-2
LP6005876-DNA_D11	1	100	wt		wt			34	4.0/8.0	4/8	4-4/8-8
LP6005877-DNA_A05	1	100	wt		wt			49	2.0	2/2	2-2/2-2
LP6005877-DNA_B01	1	100	wt		wt			45	2.16667/4.0	4/10	4-4/10-10
LP6005877-DNA_B04	1	100	wt		wt			46	5.0	5/8	5-5/8-8
LP6005877-DNA_B05	1	100	wt		wt			50	2.0/8.0	2/8	2-2/8-8
LP6005877-DNA_C02	1	100	wt		wt			47	5.0	5/8	5-5/8-8
LP6005877-DNA_C04	1	100	wt		wt			49	2.0	2/2	2-2/2-2
LP6005877-DNA_C05	1	100	wt		wt			48	2.0	2/8	2-2/8-8
LP6005877-DNA_D01	1	100	wt		wt			50	10.0	2/10	2-2/10-10
LP6005877-DNA_D03	1	100	wt		wt			46	2.0	2/2	2-2/2-2
LP6005877-DNA_E03	1	100	wt		wt			45	2.0	2/2	2-2/2-2
LP6005877-DNA_E04	1	100	wt		wt			50	2.0/5.0	2/5	2-2/5-5
LP6005877-DNA_F03	1	100	wt		wt			46	0.5/2.0	2/15	2-2/15-15
LP6005877-DNA_B09	1	100	wt		wt			49	6.0/8.0	6/8	6-6/8-8
LP6005877-DNA_C09	1	100	wt		wt			47	2.0/5.0	2/5	2-2/5-5
LP6005876-DNA_A01	1	100	wt		wt			49	2.0	2/17	2-2/16-18
LP6005876-DNA_B01	1	100	wt		wt			48	2.0/5.0	2/5	2-2/5-5
LP6005876-DNA_E01	1	100	wt		wt			49	2.0	2/2	2-2/2-2
LP6005877-DNA_A07	1	100	wt		wt			45	2.33333/8.0	8/8	8-8/8-8
LP6005877-DNA_H06	1	100	wt		wt			41	1.5/5.0	5/5	5-5/5-5
LP6005877-DNA_A03	1	100	wt		wt			42	1.33333/2.0	2/5	2-2/5-5
LP6005877-DNA_A09	1	100	wt		wt			45	1.33333/2.0	2/6	2-2/6-6
LP6005877-DNA_A10	1	100	wt		wt			48	2.0	2/2	2-2/2-2
LP6005877-DNA_B10	1	100	wt		wt			47	2.0/3.0	2/12	2-2/12-12
LP6005877-DNA_C10	1	100	wt		wt			46	2.0	2/2	2-2/2-2
LP6005877-DNA_D09	1	100	wt		wt			47	2.0	2/2	2-2/2-2
LP6005877-DNA_D10	1	100	wt		wt			42		2/12	2-2/12-12
LP6005877-DNA_E09	1	100	wt		wt			46	2.0/11.0	2/11	2-2/11-11
LP6005877-DNA_E10	1	100	wt		wt			46	1.33333/6.0	6/8	6-6/8-8
LP6005877-DNA_F06	1	100	wt		wt			42	5.0	2/5	2-2/5-5
LP6005877-DNA_F09	1	100	wt		wt			46	2.0	2/2	2-2/2-2
LP6005877-DNA_G06	1	100	wt		wt			41	2.0/4.0	2/4	2-2/4-4
LP6005877-DNA_G09	1	100	wt		wt			47	2.0/3.0	2/2	2-2/2-2
LP6005877-DNA_H09	1	100	wt		wt			46	2.0/5.0	2/5	2-2/5-5
LP6005875-DNA_A10	1	100	wt		wt			53	2.0	2/2	2-2/2-2
LP6005875-DNA_B11	1	100	wt		wt			55	2.0/5.0	2/5	2-2/5-5
LP6005875-DNA_E10	1	100	wt		wt			44	2.0/6.16667	2/8	2-2/8-8
LP6005875-DNA_F11	1	100	wt		wt			45	2.0/2.33333	2/11	2-2/11-11
LP6005875-DNA_G11	1	100	wt		wt			45	2.0/4.0	2/4	2-2/4-4
LP6005875-DNA_G12	1	100	wt		wt			44	2.0/2.16667	2/5	2-2/5-5
LP6005877-DNA_H08	1	100	wt		wt			54	2.0	2/2	2-2/2-2
LP6005880-DNA_C05	1	100	wt		wt			50	3.0/5.0	2/5	2-2/5-5
LP6008183-DNA_A01	1	150	wt		wt			42	2.0/6.0	2/6	2-2/6-6
LP6008183-DNA_B01	1	150	wt		wt			42	2.0	2/2	2-2/2-2
LP6008183-DNA_E01	1	150	wt		wt			42	2.0/8.0	2/8	2-2/8-8
LP6008183-DNA_F01	1	150	wt		wt			51	2.0	2/2	2-2/2-2
LP6008183-DNA_A02	1	150	wt		wt			45	2.0/4.0	2/4	2-2/4-4
LP6008183-DNA_B02	1	150	wt		wt			56	2.0/6.0	2/6	2-2/6-6
LP6008183-DNA_E02	1	150	wt		wt			46	6.0/9.83333	6/6	6-6/6-6
LP6008183-DNA_F02	1	150	wt		wt			48	2.0/8.0	2/8	2-2/8-8
LP6008183-DNA_A03	1	150	wt		wt			63	2.0/7.0	2/2	2-2/2-2
LP6008183-DNA_B03	1	150	wt		wt			45	2.0	2/2	2-2/2-2
LP6008183-DNA_C03	1	150	wt		wt			47	2.0/8.0	2/8	2-2/8-8
LP6008183-DNA_E03	1	150	wt		wt			44	6.0/8.0	6/8	6-6/8-8
LP6008183-DNA_F03	1	150	wt		wt			46	2.0	2/2	2-2/2-2
LP6008183-DNA_A04	1	150	wt		wt			44	2.0/11.0	2/11	2-2/11-11
LP6008183-DNA_B04	1	150	wt		wt			43	2.0/5.0	2/5	2-2/5-5
LP6008183-DNA_E04	1	150	long		long			46	5.0	5/263	5-5/233-292
LP6008183-DNA_F04	1	150	wt		wt			49	2.0/7.0	2/7	2-2/7-7
LP6008183-DNA_A05	1	150	long		long			45	5.0	5/198	5-5/173-224
LP6008183-DNA_B05	1	150	wt		wt			66	2.0/5.0	2/5	2-2/5-5
LP6008183-DNA_E05	1	150	wt		wt			42	2.0	2/2	2-2/2-2
LP6008183-DNA_F05	1	150	wt		wt			46	2.0	2/2	2-2/2-2
LP6008183-DNA_B06	1	150	wt		wt			50	2.0	2/2	2-2/2-2
LP6008183-DNA_E06	1	150	wt		wt			47	2.0/5.0	2/5	2-2/5-5
LP6008183-DNA_F06	1	150	wt		wt			46	2.0/4.0	2/4	2-2/4-4
LP6008183-DNA_A07	1	150	wt		wt			47	2.0/5.0	2/5	2-2/5-5
LP6008183-DNA_B07	1	150	wt		wt			40	2.0/8.0	2/8	2-2/8-8
LP6008183-DNA_E07	1	150	wt		wt			46	2.0/11.0	2/11	2-2/11-11
LP6008183-DNA_F07	1	150	wt		wt			49	2.0	2/2	2-2/2-2
LP6008183-DNA_A08	1	150	wt		wt			39	2.0	2/13	2-2/13-13
LP6008183-DNA_B08	1	150	wt		wt			49	2.0	2/2	2-2/2-2
LP6008183-DNA_E08	1	150	wt		wt			48	2.0/5.0	2/5	2-2/5-5
LP6008183-DNA_F08	1	150	wt		wt			48	2.0	2/2	2-2/2-2
LP6008183-DNA_A09	1	150	wt		wt			43	2.0	2/2	2-2/2-2
LP6008183-DNA_B09	1	150	wt		wt			48	2.0/7.0	2/7	2-2/7-7
LP6008183-DNA_E09	1	150	wt		wt			41	2.33333/6.0	6/8	6-6/8-8
LP6008183-DNA_F09	1	150	long		long			44	5.0/7.16667	5/469	5-5/430-510
LP6008183-DNA_A10	1	150	wt		wt			44	2.0/8.0	2/8	2-2/8-8
LP6008183-DNA_B10	1	150	wt		wt			45	2.0/10.0	2/10	2-2/10-10
LP6008183-DNA_E10	1	150	wt		wt			44	2.0	2/2	2-2/2-2
LP6008183-DNA_F10	1	150	wt		wt			41	2.0/7.0	2/7	2-2/7-7
LP6008183-DNA_A11	1	150	wt		wt			42	2.0	2/2	2-2/2-2
LP6008183-DNA_B11	1	150	wt		wt			40	2.0	2/2	2-2/2-2
LP6008183-DNA_E11	1	150	wt		wt			45	2.0	2/13	2-2/13-13
LP6008183-DNA_F11	1	150	wt		wt			51	4.0/5.0	4/5	4-4/5-5
LP6008183-DNA_A12	1	150	long		long			51	5.0	5/115	5-5/98-132
LP6008183-DNA_B12	1	150	wt		wt			51	2.0	2/2	2-2/2-2
LP6008183-DNA_E12	1	150	wt		wt			50	2.0	2/2	2-2/2-2
LP6008183-DNA_F12	1	150	wt		wt			45	5.0/8.33333	5/15	5-5/15-15
LP6008184-DNA_A01	1	150	wt		wt			51	2.0	2/2	2-2/2-2
LP6008184-DNA_D01	1	150	long		long			44	2.0	2/188	2-2/163-213
LP6008184-DNA_E01	1	150	wt		wt			44	2.0/5.0	2/5	2-2/5-5
LP6008184-DNA_H01	1	150	wt		wt			45	2.0/8.0	2/8	2-2/8-8
LP6008184-DNA_A02	1	150	wt		wt			44	2.0	2/2	2-2/2-2
LP6008184-DNA_D02	1	150	wt		wt			45	6.0/10.0	6/10	6-6/10-10
LP6008184-DNA_E02	1	150	wt		wt			46	2.0/4.0	2/4	2-2/4-4
LP6008184-DNA_H02	1	150	wt		wt			45	2.0	2/2	2-2/2-2
LP6008184-DNA_A03	1	150	wt		wt			47	2.0/8.0	2/8	2-2/8-8
LP6008184-DNA_D03	1	150	wt		wt			56	5.0/7.0	5/7	5-5/7-7
LP6008184-DNA_E03	1	150	wt		wt			45	2.0	2/2	2-2/2-2
LP6008184-DNA_H03	1	150	wt		wt			48	5.0	5/5	5-5/5-5
LP6008184-DNA_A04	1	150	wt		wt			47	2.0/5.0	2/5	2-2/5-5
LP6008184-DNA_D04	1	150	wt		wt			47	2.0/10.0	2/10	2-2/10-10
LP6008184-DNA_E04	1	150	wt		wt			44	2.0	2/2	2-2/2-2
LP6008184-DNA_H04	1	150	wt		wt			42	2.0	2/2	2-2/2-2
LP6008184-DNA_A05	1	150	wt		wt			47	2.0/5.0	2/5	2-2/5-5
LP6008184-DNA_D05	1	150	wt		wt			46	1.33333/2.0	2/2	2-2/2-2
LP6008184-DNA_E05	1	150	wt		wt			48	2.0	2/2	2-2/2-2
LP6008184-DNA_H05	1	150	wt		wt			41	0.333333/5.0	5/7	5-5/7-7
LP6008184-DNA_D06	1	150	wt		wt			44	2.0	2/2	2-2/2-2
LP6008184-DNA_E06	1	150	wt		wt			36	3.0/8.0	8/8	8-8/8-8
LP6008184-DNA_H06	1	150	wt		wt			39	2.0/5.0	2/5	2-2/5-5
LP6008184-DNA_A07	1	150	wt		wt			46	2.0/4.0	2/4	2-2/4-4
LP6008184-DNA_D07	1	150	wt		wt			44	2.0	2/2	2-2/2-2
LP6008184-DNA_E07	1	150	wt		wt			62	5.0/8.0	5/8	5-5/8-8
LP6008184-DNA_H07	1	150	wt		wt			46	2.0	2/2	2-2/2-2
LP6008184-DNA_A08	1	150	wt		wt			43	2.0/6.0	2/6	2-2/6-6
LP6008184-DNA_D08	1	150	wt		wt			45	2.0	2/2	2-2/2-2
LP6008184-DNA_E08	1	150	wt		wt			45	2.0	2/2	2-2/2-2
LP6008184-DNA_H08	1	150	wt		wt			42	2.0	2/2	2-2/2-2
LP6008184-DNA_A09	1	150	wt		wt			45	9.0/10.0	9/10	9-9/10-10
LP6008184-DNA_D09	1	150	wt		wt			44	2.0	2/2	2-2/2-2
LP6008184-DNA_E09	1	150	wt		wt			44	2.0	2/2	2-2/2-2
LP6008184-DNA_H09	1	150	wt		wt			44	2.0	2/2	2-2/2-2
LP6008184-DNA_A10	1	150	wt		wt			46	5.0/11.0	5/11	5-5/11-11
LP6008184-DNA_E10	1	150	wt		wt			48	2.0	2/2	2-2/2-2
LP6008184-DNA_H10	1	150	wt		wt			52	2.0/6.0	2/6	2-2/6-6
LP6008184-DNA_A11	1	150	wt		wt			42	2.0/5.0	2/5	2-2/5-5
LP6008184-DNA_D11	1	150	wt		wt			38	2.0/6.0	2/6	2-2/6-6
LP6008184-DNA_E11	1	150	wt		wt			42	2.0/5.0	2/5	2-2/5-5
LP6008184-DNA_H11	1	150	wt		wt			42	2.0	2/2	2-2/2-2
LP6008184-DNA_A12	1	150	wt		wt			39	2.0/8.0	2/8	2-2/8-8
LP6008184-DNA_D12	1	150	wt		wt			44	2.0	2/2	2-2/2-2
LP6008184-DNA_E12	1	150	long		long			44	1.33333/5.0	5/751	5-5/699-803
LP6008184-DNA_G12	1	150	wt		wt			38	2.0/5.0	2/5	2-2/5-5
LP6008184-DNA_H12	1	150	wt		wt			43	2.0	2/2	2-2/2-2
LP6008185-DNA_A01	1	150	wt		wt			45	2.0/10.0	2/10	2-2/10-10
LP6008185-DNA_B01	1	150	wt		wt			56	1.33333/5.0	5/14	5-5/14-14
LP6008185-DNA_F01	1	150	wt		wt			42	5.0/8.0	5/8	5-5/8-8
LP6008185-DNA_G01	1	150	wt		wt			42	2.0/5.0	2/5	2-2/5-5
LP6008185-DNA_H01	1	150	wt		wt			45	5.0/11.0	5/11	5-5/11-11
LP6008185-DNA_A02	1	150	wt		wt			44	2.0/10.0	2/10	2-2/10-10
LP6008185-DNA_B02	1	150	wt		wt			42	5.0/8.0	5/8	5-5/8-8
LP6008185-DNA_F02	1	150	wt		wt			48	2.0/8.0	2/8	2-2/8-8
LP6008185-DNA_G02	1	150	wt		wt			56	3.0/10.0	5/10	5-5/10-10
LP6008185-DNA_H02	1	150	wt		wt			44	0.333333/7.0	6/7	6-6/7-7
LP6008185-DNA_A03	1	150	long		long			40	2.33333/8.0	8/696	8-8/644-750
LP6008185-DNA_B03	1	150	wt		wt			43	2.0/5.0	2/5	2-2/5-5
LP6008185-DNA_F03	1	150	wt		wt			42	2.0	2/2	2-2/2-2
LP6008185-DNA_G03	1	150	wt		wt			43	0.333333/6.0	6/8	6-6/8-8
LP6008185-DNA_H03	1	150	wt		wt			44	2.0/6.0	2/6	2-2/6-6
LP6008185-DNA_A04	1	150	long		long			45	2.33333/5.0	5/156	5-5/134-177
LP6008185-DNA_B04	1	150	wt		wt			47	2.0	2/2	2-2/2-2
LP6008185-DNA_F04	1	150	wt		wt			40	2.0/9.83333	2/8	2-2/8-8
LP6008185-DNA_G04	1	150	long		long			39	1.33333/2.0	2/506	2-2/462-552
LP6008185-DNA_H04	1	150	wt		wt			40	5.0/8.0	5/8	5-5/8-8
LP6008185-DNA_A05	1	150	wt		wt			37	2.0	2/2	2-2/2-2
LP6008185-DNA_B05	1	150	wt		wt			47	8.0/9.0	8/9	8-8/9-9
LP6008185-DNA_F05	1	150	wt		wt			44	2.0	2/2	2-2/2-2
LP6008185-DNA_G05	1	150	wt		wt			39	2.0	2/2	2-2/2-2
LP6008185-DNA_H05	1	150	wt		wt			45	2.0/11.0	2/11	2-2/11-11
LP6008185-DNA_A06	1	150	wt		wt			36	5.0	5/5	5-5/5-5
LP6008185-DNA_B06	1	150	wt		wt			44	2.0/6.0	2/6	2-2/6-6
LP6008185-DNA_F06	1	150	wt		wt			45	2.0/5.0	2/5	2-2/5-5
LP6008185-DNA_G06	1	150	wt		wt			43	2.0/5.0	2/5	2-2/5-5
LP6008185-DNA_H06	1	150	wt		wt			44	2.0/8.0	2/8	2-2/8-8
LP6008185-DNA_A07	1	150	wt		wt			46	2.0/5.0	2/5	2-2/5-5
LP6008185-DNA_B07	1	150	wt		wt			59	2.33333/8.0	8/8	8-8/8-8
LP6008185-DNA_F07	1	150	wt		wt			43	2.0	2/17	2-2/17-17
LP6008185-DNA_G07	1	150	wt		wt			47	2.0/5.0	2/5	2-2/5-5
LP6008185-DNA_H07	1	150	wt		wt			45	2.0	2/2	2-2/2-2
LP6008185-DNA_A08	1	150	wt		wt			46	2.0/5.0	2/5	2-2/5-5
LP6008185-DNA_B08	1	150	wt		wt			47	2.0	2/2	2-2/2-2
LP6008185-DNA_F08	1	150	long		long			44	6.0	6/499	6-6/458-541
LP6008185-DNA_G08	1	150	wt		wt			48	5.0	5/5	5-5/5-5
LP6008185-DNA_H08	1	150	wt		wt			47	2.0/5.0	2/5	2-2/5-5
LP6008185-DNA_A09	1	150	wt		wt			47	2.0	2/2	2-2/2-2
LP6008185-DNA_B09	1	150	wt		wt			41	2.0/5.0	2/5	2-2/5-5
LP6008185-DNA_F09	1	150	wt		wt			44	2.0/5.0	2/5	2-2/5-5
LP6008185-DNA_H09	1	150	wt		wt			46	2.0	2/2	2-2/2-2
LP6008185-DNA_A10	1	150	wt		wt			46	5.0/8.0	5/8	5-5/8-8
LP6008185-DNA_B10	1	150	wt		wt			38	5.0/6.0	5/6	5-5/6-6
LP6008185-DNA_F10	1	150	wt		wt			46	2.0	2/2	2-2/2-2
LP6008185-DNA_G10	1	150	long		long			44	2.0/3.0	2/608	2-2/562-655
LP6008185-DNA_H10	1	150	wt		wt			45	5.0/7.0	5/7	5-5/7-7
LP6008185-DNA_A11	1	150	wt		wt			42	2.0/7.0	2/7	2-2/7-7
LP6008185-DNA_B11	1	150	wt		wt			46	2.0/5.0	2/5	2-2/5-5
LP6008185-DNA_F11	1	150	wt		wt			42	2.0/5.0	2/5	2-2/5-5
LP6008185-DNA_G11	1	150	wt		wt			45	2.0/5.0	2/5	2-2/5-5
LP6008185-DNA_H11	1	150	wt		wt			43	2.0	2/2	2-2/2-2
LP6008185-DNA_A12	1	150	wt		wt			40	2.0	2/2	2-2/2-2
LP6008185-DNA_B12	1	150	long		long			43	2.0	2/670	2-2/620-720
LP6008185-DNA_F12	1	150	wt		wt			42	2.0	2/2	2-2/2-2
LP6008185-DNA_G12	1	150	wt		wt			43	2.0/8.0	2/8	2-2/8-8
LP6008185-DNA_H12	1	150	wt		wt			44	0.333333/5.0	5/6	5-5/6-6
LP6008186-DNA_C01	1	150	wt		wt			44	4.0/5.0	4/5	4-4/5-5
LP6008186-DNA_D01	1	150	wt		wt			45	5.0/7.0	5/7	5-5/7-7
LP6008186-DNA_E01	1	150	wt		wt			47	2.0	2/2	2-2/2-2
LP6008186-DNA_G01	1	150	wt		wt			45	5.0/8.0	5/8	5-5/8-8
LP6008186-DNA_H01	1	150	wt		wt			45	2.0	2/10	2-2/10-10
LP6008186-DNA_C02	1	150	wt		wt			50	2.0/5.0	2/5	2-2/5-5
LP6008186-DNA_D02	1	150	wt		wt			47	3.0/8.0	6/8	6-6/8-8
LP6008186-DNA_G02	1	150	wt		wt			49	2.0/10.0	2/10	2-2/10-10
LP6008186-DNA_H02	1	150	wt		wt			48	2.0/8.0	2/8	2-2/8-8
LP6008186-DNA_C03	1	150	wt		wt			48	2.0/5.0	2/5	2-2/5-5
LP6008186-DNA_D03	1	150	wt		wt			48	2.0/5.0	2/5	2-2/5-5
LP6008186-DNA_E03	1	150	wt		wt			48	5.0	5/5	5-5/5-5
LP6008186-DNA_G03	1	150	wt		wt			47	2.0/8.0	2/8	2-2/8-8
LP6008186-DNA_H03	1	150	long		long			37	3.0/9.0	9/766	9-9/709-825
LP6008186-DNA_C04	1	150	wt		wt			44	2.0/11.0	2/11	2-2/11-11
LP6008186-DNA_D04	1	150	wt		long			38	5.0	5/1177	5-5/1106-1247
LP6008186-DNA_E04	1	150	wt		wt			47	2.0/7.0	2/7	2-2/7-7
LP6008186-DNA_G04	1	150	wt		wt			43	2.0	2/2	2-2/2-2
LP6008186-DNA_H04	1	150	wt		wt			47	2.0	2/2	2-2/2-2
LP6008186-DNA_C05	1	150	wt		wt			45	2.0/5.0	2/5	2-2/5-5
LP6008186-DNA_D05	1	150	wt		wt			46	2.0/6.0	2/6	2-2/6-6
LP6008186-DNA_E05	1	150	wt		wt			48	2.0	2/2	2-2/2-2
LP6008186-DNA_G05	1	150	wt		wt			45	2.0/8.0	2/8	2-2/8-8
LP6008186-DNA_C06	1	150	wt		wt			40	2.0/5.0	2/5	2-2/5-5
LP6008186-DNA_D06	1	150	long		long			45	2.0	2/132	2-2/112-150
LP6008186-DNA_E06	1	150	wt		wt			44	2.0/5.0	2/5	2-2/5-5
LP6008186-DNA_G06	1	150	wt		wt			40	2.0	2/2	2-2/2-2
LP6008186-DNA_H06	1	150	wt		wt			64	2.0/8.0	2/8	2-2/8-8
LP6008186-DNA_C07	1	150	wt		wt			39	5.0/8.0	5/8	5-5/8-8
LP6008186-DNA_D07	1	150	wt		wt			39	2.0	2/2	2-2/2-2
LP6008186-DNA_E07	1	150	wt		wt			41	2.0	2/14	2-2/14-14
LP6008186-DNA_G07	1	150	wt		wt			50	2.0/8.0	2/8	2-2/8-8
LP6008186-DNA_H07	1	150	wt		wt			46	5.0/6.0	5/6	5-5/6-6
LP6008186-DNA_C08	1	150	wt		wt			40	2.0/7.0	2/7	2-2/7-7
LP6008186-DNA_D08	1	150	wt		wt			40	6.0	6/6	6-6/6-6
LP6008186-DNA_E08	1	150	wt		wt			40	1.33333/2.0	2/12	2-2/12-12
LP6008186-DNA_G08	1	150	wt		wt			45	2.0	2/2	2-2/2-2
LP6008186-DNA_H08	1	150	wt		wt			38	8.0/10.0	8/10	8-8/10-10
LP6008186-DNA_C09	1	150	long		wt			46	2.0/5.0	2/5	2-2/5-5
LP6008186-DNA_D09	1	150	wt		wt			44	2.0	2/2	2-2/2-2
LP6008186-DNA_E09	1	150	wt		wt			45	2.0	2/2	2-2/2-2
LP6008186-DNA_G09	1	150	wt		wt			46	2.0	2/2	2-2/2-2
LP6008186-DNA_H09	1	150	wt		wt			46	2.0/4.0	2/4	2-2/4-4
LP6008186-DNA_C10	1	150	wt		wt			44	1.5/5.0	5/8	5-5/8-8
LP6008186-DNA_D10	1	150	wt		wt			47	2.0/5.0	2/5	2-2/5-5
LP6008186-DNA_E10	1	150	wt		wt			41	2.0/8.0	2/8	2-2/8-8
LP6008186-DNA_G10	1	150	wt		wt			46	10.0	10/14	10-10/14-14
LP6008186-DNA_H10	1	150	wt		wt			45	2.0	2/2	2-2/2-2
LP6008186-DNA_C11	1	150	wt		wt			49	2.0/5.0	2/5	2-2/5-5
LP6008186-DNA_D11	1	150	long		long			49	8.0	8/265	8-8/237-293
LP6008186-DNA_E11	1	150	wt		wt			68	0.333333/5.0	5/6	5-5/6-6
LP6008186-DNA_G11	1	150	wt		wt			48	2.0	2/2	2-2/2-2
LP6008186-DNA_H11	1	150	wt		wt			47	8.0	8/8	8-8/8-8
LP6008186-DNA_C12	1	150	wt		wt			39	2.0/8.0	2/8	2-2/8-8
LP6008186-DNA_D12	1	150	wt		wt			46	2.0	2/2	2-2/2-2
LP6008186-DNA_E12	1	150	long		long			41	8.0	8/391	8-8/352-430
LP6008186-DNA_G12	1	150	wt		wt			43	2.0/4.0	2/4	2-2/4-4
LP6008186-DNA_H12	1	150	wt		wt			43	2.0/4.0	2/4	2-2/4-4
LP6008187-DNA_D01	1	150	wt		wt			42	2.0	2/2	2-2/2-2
LP6008187-DNA_E01	1	150	wt		wt			37	2.0/8.0	2/8	2-2/8-8
LP6008187-DNA_F01	1	150	long		long			45	3.0/8.33333	14/503	14-14/461-544
LP6008187-DNA_G01	1	150	wt		wt			46	8.0	8/12	8-8/12-12
LP6008187-DNA_H01	1	150	wt		wt			44	2.0/5.0	2/5	2-2/5-5
LP6008187-DNA_D02	1	150	wt		wt			39	2.0/8.0	2/8	2-2/8-8
LP6008187-DNA_E02	1	150	wt		wt			38	2.0/5.0	2/5	2-2/5-5
LP6008187-DNA_F02	1	150	wt		wt			41	10.0	10/12	10-10/12-12
LP6008187-DNA_G02	1	150	wt		wt			42	2.0/5.0	2/5	2-2/5-5
LP6008187-DNA_H02	1	150	wt		wt			40	2.0/5.0	2/5	2-2/5-5
LP6008187-DNA_D03	1	150	wt		wt			48	2.0/8.0	2/8	2-2/8-8
LP6008187-DNA_E03	1	150	long		long			47	2.0/3.5	2/426	2-2/389-464
LP6008187-DNA_F03	1	150	wt		wt			49	2.0/8.0	2/8	2-2/8-8
LP6008187-DNA_G03	1	150	wt		wt			45	2.0/5.0	2/5	2-2/5-5
LP6008187-DNA_D04	1	150	wt		wt			45	2.0/10.0	2/10	2-2/10-10
LP6008187-DNA_E04	1	150	wt		wt			40	5.0	5/5	5-5/5-5
LP6008187-DNA_F04	1	150	wt		wt			40	0.333333/5.0	5/15	5-5/15-15
LP6008187-DNA_G04	1	150	wt		wt			38	2.0	2/2	2-2/2-2
LP6008187-DNA_H04	1	150	wt		wt			39	2.0	2/14	2-2/14-14
LP6008187-DNA_D05	1	150	wt		wt			47	2.0/8.0	2/8	2-2/8-8
LP6008187-DNA_E05	1	150	wt		wt			43	5.0/8.0	5/8	5-5/8-8
LP6008187-DNA_F05	1	150	wt		wt			43	2.0/8.0	2/8	2-2/8-8
LP6008187-DNA_G05	1	150	wt		wt			45	2.0	2/2	2-2/2-2
LP6008187-DNA_H05	1	150	wt		wt			44	2.0	2/2	2-2/2-2
LP6008187-DNA_D06	1	150	wt		wt			42	2.0/5.0	2/5	2-2/5-5
LP6008187-DNA_E06	1	150	wt		wt			42	2.0	2/15	2-2/15-15
LP6008187-DNA_F06	1	150	wt		wt			41	2.0	2/2	2-2/2-2
LP6008187-DNA_G06	1	150	wt		wt			41	2.0/8.0	2/8	2-2/8-8
LP6008187-DNA_H06	1	150	wt		wt			42	2.0/3.0	2/8	2-2/8-8
LP6008187-DNA_D07	1	150	wt		wt			47	4.0/5.0	4/5	4-4/5-5
LP6008187-DNA_E07	1	150	wt		wt			39	2.0/5.0	2/5	2-2/5-5
LP6008187-DNA_F07	1	150	wt		wt			48	2.0	2/2	2-2/2-2
LP6008187-DNA_G07	1	150	wt		wt			45	2.0	2/2	2-2/2-2
LP6008187-DNA_H07	1	150	wt		wt			49	4.0/5.0	4/5	4-4/5-5
LP6008187-DNA_D08	1	150	wt		wt			46	5.0/8.0	5/8	5-5/8-8
LP6008187-DNA_E08	1	150	wt		wt			36	2.0/6.0	2/6	2-2/6-6
LP6008187-DNA_F08	1	150	wt		wt			45	2.0	2/2	2-2/2-2
LP6008187-DNA_G08	1	150	wt		wt			40	2.0	2/2	2-2/2-2
LP6008187-DNA_H08	1	150	wt		wt			46	4.0/5.0	4/5	4-4/5-5
LP6008187-DNA_D09	1	150	wt		wt			48	2.0/5.0	2/5	2-2/5-5
LP6008187-DNA_E09	1	150	wt		wt			45	2.0/7.0	2/7	2-2/7-7
LP6008187-DNA_F09	1	150	wt		wt			43	5.0	5/5	5-5/5-5
LP6008187-DNA_G09	1	150	wt		wt			46	2.0/5.0	2/5	2-2/5-5
LP6008187-DNA_H09	1	150	wt		wt			48	5.0/10.0	5/10	5-5/10-10
LP6008187-DNA_D10	1	150	wt		wt			41	2.0	2/2	2-2/2-2
LP6008187-DNA_E10	1	150	wt		wt			51	2.0/5.0	2/5	2-2/5-5
LP6008187-DNA_F10	1	150	wt		wt			42	2.0/8.0	2/8	2-2/8-8
LP6008187-DNA_G10	1	150	wt		wt			42	2.0	2/2	2-2/2-2
LP6008187-DNA_H10	1	150	wt		wt			40	2.0/4.0	2/4	2-2/4-4
LP6008187-DNA_D11	1	150	wt		wt			51	2.0/4.0	2/4	2-2/4-4
LP6008187-DNA_E11	1	150	wt		wt			45	2.0/5.0	2/5	2-2/5-5
LP6008187-DNA_F11	1	150	wt		wt			50	2.0/8.0	2/8	2-2/8-8
LP6008187-DNA_G11	1	150	wt		wt			47	5.0/8.0	5/8	5-5/8-8
LP6008187-DNA_H11	1	150	long		long			64	1.33333/6.0	6/404	6-6/374-434
LP6008187-DNA_B12	1	150	wt		wt			48	5.0/8.0	5/8	5-5/8-8
LP6008187-DNA_D12	1	150	wt		wt			43	2.0/5.0	2/5	2-2/5-5
LP6008187-DNA_E12	1	150	wt		wt			43	2.0/6.0	2/6	2-2/6-6
LP6008187-DNA_F12	1	150	wt		wt			43	2.0	2/2	2-2/2-2
LP6008187-DNA_G12	1	150	wt		wt			39	5.0	5/14	5-5/14-14
LP6008188-DNA_A01	1	150	wt		wt			43	2.0	2/2	2-2/2-2
LP6008188-DNA_B01	1	150	wt		wt			39	2.0/5.0	2/5	2-2/5-5
LP6008188-DNA_C01	1	150	wt		wt			38	2.0/5.0	2/5	2-2/5-5
LP6008188-DNA_F01	1	150	wt		wt			45	2.0/5.0	2/5	2-2/5-5
LP6008188-DNA_G01	1	150	wt		wt			42	2.0	2/2	2-2/2-2
LP6008188-DNA_A02	1	150	long		long			46	2.0	2/371	2-2/335-407
LP6008188-DNA_C02	1	150	wt		wt			47	2.0/5.0	2/5	2-2/5-5
LP6008188-DNA_G02	1	150	wt		wt			48	2.0	2/2	2-2/2-2
LP6008188-DNA_A03	1	150	wt		wt			43	2.0	2/2	2-2/2-2
LP6008188-DNA_B03	1	150	long		long			39		12/661	12-12/610-713
LP6008188-DNA_C03	1	150	wt		wt			43	2.0/5.0	2/5	2-2/5-5
LP6008188-DNA_F03	1	150	wt		wt			37	2.0/7.66667	2/8	2-2/8-8
LP6008188-DNA_A04	1	150	wt		wt			60	2.0	2/2	2-2/2-2
LP6008188-DNA_B04	1	150	wt		wt			44	2.0	2/2	2-2/2-2
LP6008188-DNA_C04	1	150	wt		wt			39	2.0/5.0	2/5	2-2/5-5
LP6008188-DNA_F04	1	150	long		long			42	2.0	2/363	2-2/326-400
LP6008188-DNA_G04	1	150	wt		wt			43	2.0	2/2	2-2/2-2
LP6008188-DNA_A05	1	150	wt		wt			44	2.0	2/2	2-2/2-2
LP6008188-DNA_B05	1	150	wt		wt			38	2.0	2/2	2-2/2-2
LP6008188-DNA_C05	1	150	wt		wt			46	2.0/8.0	2/8	2-2/8-8
LP6008188-DNA_F05	1	150	wt		wt			42	8.0/11.0	8/11	8-8/11-11
LP6008188-DNA_G05	1	150	wt		wt			43	2.0/5.0	2/5	2-2/5-5
LP6008188-DNA_A06	1	150	long		long			43	0.333333/2.0	2/327	2-2/293-360
LP6008188-DNA_B06	1	150	wt		wt			41	2.0/8.0	2/8	2-2/8-8
LP6008188-DNA_C06	1	150	long		long			42	2.0	2/285	2-2/253-317
LP6008188-DNA_F06	1	150	wt		wt			48	2.0/6.33333	2/6	2-2/6-6
LP6008188-DNA_G06	1	150	wt		wt			44	2.0	2/2	2-2/2-2
LP6008188-DNA_A07	1	150	wt		wt			44	2.33333/8.0	8/8	8-8/8-8
LP6008188-DNA_B07	1	150	wt		wt			64	2.0	2/2	2-2/2-2
LP6008188-DNA_C07	1	150	wt		wt			45	2.0	2/2	2-2/2-2
LP6008188-DNA_F07	1	150	wt		wt			35	2.0	2/2	2-2/2-2
LP6008188-DNA_G07	1	150	wt		wt			46	2.0/7.0	2/7	2-2/7-7
LP6008188-DNA_A08	1	150	wt		wt			42	2.0/5.0	2/5	2-2/5-5
LP6008188-DNA_B08	1	150	wt		wt			40	5.0	5/5	5-5/5-5
LP6008188-DNA_C08	1	150	wt		wt			42	2.0	2/12	2-2/12-12
LP6008188-DNA_F08	1	150	wt		wt			47	5.0	5/5	5-5/5-5
LP6008188-DNA_G08	1	150	wt		wt			41	2.0/5.0	2/5	2-2/5-5
LP6008188-DNA_A09	1	150	wt		wt			45	2.0/11.0	2/11	2-2/11-11
LP6008188-DNA_B09	1	150	wt		wt			43	2.0	2/2	2-2/2-2
LP6008188-DNA_C09	1	150	wt		wt			37	0.333333/8.0	6/8	6-6/8-8
LP6008188-DNA_F09	1	150	wt		wt			43	2.0/5.0	2/5	2-2/5-5
LP6008188-DNA_G09	1	150	wt		wt			42	2.0/5.0	2/5	2-2/5-5
LP6008188-DNA_A10	1	150	wt		wt			47	2.0/5.0	2/5	2-2/5-5
LP6008188-DNA_B10	1	150	wt		wt			44	2.0/5.0	2/5	2-2/5-5
LP6008188-DNA_C10	1	150	wt		wt			41	2.0	2/13	2-2/13-13
LP6008188-DNA_F10	1	150	wt		wt			41	2.0/4.33333	2/4	2-2/4-4
LP6008188-DNA_G10	1	150	wt		wt			46	2.33333/5.0	5/8	5-5/8-8
LP6008188-DNA_A11	1	150	wt		wt			51	2.0/4.0	2/4	2-2/4-4
LP6008188-DNA_B11	1	150	wt		wt			38	6.0/11.1667	6/8	6-6/8-8
LP6008188-DNA_C11	1	150	long		long			42	1.33333/6.0	6/172	6-6/147-196
LP6008188-DNA_F11	1	150	wt		wt			45	2.0/6.0	2/6	2-2/6-6
LP6008188-DNA_G11	1	150	wt		wt			47	2.0	2/2	2-2/2-2
LP6008188-DNA_B12	1	150	wt		wt			47	2.0/5.0	2/5	2-2/5-5
LP6008188-DNA_C12	1	150	wt		wt			49	2.0/6.0	2/6	2-2/6-6
LP6008188-DNA_F12	1	150	wt		wt			46	8.0	8/8	8-8/8-8
LP6008188-DNA_G12	1	150	wt		wt			41	8.0	8/16	8-8/16-16
LP6008189-DNA_A01	1	150	wt		wt			45	2.0	2/14	2-2/14-14
LP6008189-DNA_B01	1	150	long		long			44	2.0	2/471	2-2/429-512
LP6008189-DNA_D01	1	150	wt		wt			66	5.0/8.0	5/8	5-5/8-8
LP6008189-DNA_F01	1	150	long		long			45	2.0	2/467	2-2/428-507
LP6008189-DNA_H01	1	150	wt		wt			45	2.0/8.0	2/8	2-2/8-8
LP6008189-DNA_A02	1	150	long		long			47	2.0	2/325	2-2/291-357
LP6008189-DNA_B02	1	150	wt		wt			48	5.0	5/11	5-5/11-11
LP6008189-DNA_D02	1	150	wt		wt			46	2.0/5.0	2/5	2-2/5-5
LP6008189-DNA_F02	1	150	long		long			44	5.0	5/368	5-5/332-404
LP6008189-DNA_H02	1	150	wt		wt			44	2.0/6.0	2/6	2-2/6-6
LP6008189-DNA_A03	1	150	wt		wt			50	2.0	2/2	2-2/2-2
LP6008189-DNA_B03	1	150	wt		wt			43	2.0	2/2	2-2/2-2
LP6008189-DNA_D03	1	150	wt		wt			44	2.0/8.0	2/8	2-2/8-8
LP6008189-DNA_F03	1	150	wt		wt			44	2.0	2/13	2-2/13-13
LP6008189-DNA_H03	1	150	wt		wt			69	4.0/5.0	4/5	4-4/5-5
LP6008189-DNA_A04	1	150	wt		wt			43	2.0	2/2	2-2/2-2
LP6008189-DNA_B04	1	150	wt		wt			42	2.0	2/2	2-2/2-2
LP6008189-DNA_D04	1	150	wt		wt			45	2.0	2/2	2-2/2-2
LP6008189-DNA_F04	1	150	wt		wt			45	3.16667/5.0	5/5	5-5/5-5
LP6008189-DNA_H04	1	150	wt		wt			46	2.0/5.0	2/5	2-2/5-5
LP6008189-DNA_A05	1	150	wt		wt			47	2.0	2/2	2-2/2-2
LP6008189-DNA_B05	1	150	wt		wt			44	2.0	2/2	2-2/2-2
LP6008189-DNA_D05	1	150	wt		wt			44	2.0/8.0	2/8	2-2/8-8
LP6008189-DNA_F05	1	150	long		long			46	2.16667/5.0	5/388	5-5/351-424
LP6008189-DNA_H05	1	150	long		long			40	2.0	2/1192	2-2/1122-1262
LP6008189-DNA_A06	1	150	wt		wt			43	2.0/10.0	2/10	2-2/10-10
LP6008189-DNA_B06	1	150	wt		wt			50	2.0/5.0	2/5	2-2/5-5
LP6008189-DNA_D06	1	150	wt		wt			47	2.0/5.0	2/5	2-2/5-5
LP6008189-DNA_F06	1	150	long		long			42	3.0/8.0	8/468	8-8/424-510
LP6008189-DNA_H06	1	150	wt		wt			45	2.0/9.0	2/9	2-2/9-9
LP6008189-DNA_A07	1	150	wt		wt			47	2.0	2/2	2-2/2-2
LP6008189-DNA_B07	1	150	wt		wt			44	2.0/4.33333	2/2	2-2/2-2
LP6008189-DNA_D07	1	150	wt		wt			44	5.0/8.0	5/8	5-5/8-8
LP6008189-DNA_F07	1	150	wt		wt			45	5.0	5/5	5-5/5-5
LP6008189-DNA_H07	1	150	wt		wt			39	2.0	2/2	2-2/2-2
LP6008189-DNA_A08	1	150	wt		wt			44	2.0/5.0	2/2	2-2/2-2
LP6008189-DNA_B08	1	150	wt		wt			36	2.0/2.33333	2/8	2-2/8-8
LP6008189-DNA_D08	1	150	wt		wt			44	2.0/8.0	2/8	2-2/8-8
LP6008189-DNA_F08	1	150	wt		wt			39	5.0/8.0	5/8	5-5/8-8
LP6008189-DNA_H08	1	150	wt		wt			41	2.0/5.0	2/5	2-2/5-5
LP6008189-DNA_A09	1	150	wt		wt			43	2.0	2/10	2-2/10-10
LP6008189-DNA_B09	1	150	wt		wt			42	2.0/7.0	2/7	2-2/7-7
LP6008189-DNA_D09	1	150	wt		wt			42	5.0/8.0	5/8	5-5/8-8
LP6008189-DNA_F09	1	150	wt		wt			42	2.0	2/2	2-2/2-2
LP6008189-DNA_H09	1	150	wt		wt			40	2.0/3.0	2/2	2-2/2-2
LP6008189-DNA_A10	1	150	wt		wt			66	2.0	2/2	2-2/2-2
LP6008189-DNA_D10	1	150	wt		wt			49	5.0/6.0	5/6	5-5/6-6
LP6008189-DNA_F10	1	150	long		long			41	2.0	2/412	2-2/371-452
LP6008189-DNA_H10	1	150	wt		wt			47	6.0/8.0	6/8	6-6/8-8
LP6008189-DNA_A11	1	150	wt		wt			43	2.0/6.0	2/6	2-2/6-6
LP6008189-DNA_B11	1	150	wt		wt			48	2.0/10.0	2/10	2-2/10-10
LP6008189-DNA_D11	1	150	wt		wt			47	8.0	8/8	8-8/8-8
LP6008189-DNA_F11	1	150	wt		wt			46	3.0/11.0	2/11	2-2/11-11
LP6008189-DNA_H11	1	150	wt		wt			46	6.0/10.0	6/10	6-6/10-10
LP6008189-DNA_A12	1	150	wt		wt			42	5.0/8.0	5/8	5-5/8-8
LP6008189-DNA_B12	1	150	wt		wt			48	2.0	2/2	2-2/2-2
LP6008189-DNA_D12	1	150	wt		wt			46	4.0/11.0	4/11	4-4/11-11
LP6008189-DNA_H12	1	150	wt		wt			43	2.0	2/2	2-2/2-2
LP6008190-DNA_B01	1	150	wt		wt			47	2.0/8.0	2/8	2-2/8-8
LP6008190-DNA_C01	1	150	wt		wt			46	2.0/8.0	2/8	2-2/8-8
LP6008190-DNA_D01	1	150	wt		wt			40	2.0/8.0	2/8	2-2/8-8
LP6008190-DNA_E01	1	150	long		long			42	2.0	2/339	2-2/303-373
LP6008190-DNA_F01	1	150	wt		wt			46	2.0/8.0	2/8	2-2/8-8
LP6008190-DNA_B02	1	150	long		long			44	2.33333/8.0	8/201	8-8/175-226
LP6008190-DNA_C02	1	150	wt		wt			45	2.0/5.0	2/5	2-2/5-5
LP6008190-DNA_D02	1	150	wt		wt			42	2.0/5.0	2/5	2-2/5-5
LP6008190-DNA_E02	1	150	wt		wt			44	2.0/5.0	2/5	2-2/5-5
LP6008190-DNA_F02	1	150	wt		wt			43	1.33333/5.0	5/5	5-5/5-5
LP6008190-DNA_B03	1	150	wt		wt			45	2.0/5.0	2/5	2-2/5-5
LP6008190-DNA_C03	1	150	wt		wt			45	2.0/5.0	2/5	2-2/5-5
LP6008190-DNA_D03	1	150	wt		wt			47	2.0/8.0	2/8	2-2/8-8
LP6008190-DNA_E03	1	150	wt		wt			42	2.0/8.0	2/8	2-2/8-8
LP6008190-DNA_F03	1	150	wt		wt			46	2.0/5.0	2/5	2-2/5-5
LP6008190-DNA_B04	1	150	wt		wt			48	5.0	5/5	5-5/5-5
LP6008190-DNA_E04	1	150	wt		wt			37	2.0/10.0	2/10	2-2/10-10
LP6008190-DNA_F04	1	150	wt		wt			45	2.0/10.0	2/10	2-2/10-10
LP6008190-DNA_D05	1	150	wt		wt			44	2.0	2/2	2-2/2-2
LP6008190-DNA_E05	1	150	wt		wt			34	2.0/8.0	2/8	2-2/8-8
LP6008190-DNA_F05	1	150	wt		wt			57	10.0	10/12	10-10/12-12
LP6008190-DNA_C06	1	150	wt		wt			41	2.0/8.0	2/8	2-2/8-8
LP6008190-DNA_D06	1	150	wt		wt			39	2.0/8.0	2/8	2-2/8-8
LP6008190-DNA_E06	1	150	wt		wt			43	2.0/10.0	2/10	2-2/10-10
LP6008190-DNA_F06	1	150	wt		wt			41	2.0	2/9	2-2/9-9
LP6008190-DNA_B07	1	150	wt		wt			51	2.0	2/2	2-2/2-2
LP6008190-DNA_C07	1	150	wt		wt			50	5.0/8.0	5/8	5-5/8-8
LP6008190-DNA_D07	1	150	wt		wt			52	2.0	2/2	2-2/2-2
LP6008190-DNA_E07	1	150	wt		wt			48	2.0/7.0	2/7	2-2/7-7
LP6008190-DNA_F07	1	150	wt		wt			50	5.0	5/5	5-5/5-5
LP6008190-DNA_B08	1	150	wt		wt			46	5.0/8.0	5/8	5-5/8-8
LP6008190-DNA_C08	1	150	wt		wt			46	0.166667/2.0	2/2	2-2/2-2
LP6008190-DNA_D08	1	150	wt		wt			45	2.0	2/2	2-2/2-2
LP6008190-DNA_E08	1	150	wt		wt			43	2.0/6.0	2/6	2-2/6-6
LP6008190-DNA_F08	1	150	wt		wt			45	2.0/5.0	2/5	2-2/5-5
LP6008190-DNA_B09	1	150	wt		wt			44	5.0	5/5	5-5/5-5
LP6008190-DNA_C09	1	150	wt		wt			45	2.0	2/2	2-2/2-2
LP6008190-DNA_D09	1	150	wt		wt			43	2.0/4.0	2/4	2-2/4-4
LP6008190-DNA_E09	1	150	wt		wt			41	2.0/6.0	2/6	2-2/6-6
LP6008190-DNA_F09	1	150	wt		wt			45	2.0/7.0	2/7	2-2/7-7
LP6008190-DNA_B10	1	150	wt		wt			49	2.0	2/2	2-2/2-2
LP6008190-DNA_C10	1	150	wt		wt			50	2.0	2/2	2-2/2-2
LP6008190-DNA_D10	1	150	wt		wt			42	3.0/5.0	5/12	5-5/12-12
LP6008190-DNA_E10	1	150	wt		wt			43	2.0/8.0	2/8	2-2/8-8
LP6008190-DNA_F10	1	150	wt		wt			45	2.0/4.0	2/4	2-2/4-4
LP6008190-DNA_B11	1	150	wt		wt			38	2.0/8.0	2/8	2-2/8-8
LP6008190-DNA_C11	1	150	wt		wt			41	2.0/10.0	2/10	2-2/10-10
LP6008190-DNA_D11	1	150	wt		wt			36	2.0/6.0	2/6	2-2/6-6
LP6008190-DNA_E11	1	150	wt		wt			42	2.0/5.0	2/5	2-2/5-5
LP6008190-DNA_F11	1	150	wt		wt			45	3.0/5.0	5/5	5-5/5-5
LP6008190-DNA_B12	1	150	wt		wt			45	3.0/8.0	8/10	8-8/10-10
LP6008190-DNA_C12	1	150	wt		wt			47	2.0/6.0	2/6	2-2/6-6
LP6008190-DNA_D12	1	150	wt		wt			43	5.0/8.0	5/8	5-5/8-8
LP6008190-DNA_E12	1	150	wt		wt			52	2.0	2/2	2-2/2-2
LP6008190-DNA_F12	1	150	wt		wt			45	2.0/5.0	2/5	2-2/5-5
LP6008191-DNA_A01	1	150	wt		wt			43	0.333333/8.0	6/8	6-6/8-8
LP6008191-DNA_B01	1	150	wt		wt			41	2.0	2/12	2-2/12-12
LP6008191-DNA_F01	1	150	wt		wt			49	3.0	12/12	12-12/12-12
LP6008191-DNA_G01	1	150	wt		wt			40	2.0	2/2	2-2/2-2
LP6008191-DNA_H01	1	150	wt		wt			44	2.0/5.0	2/5	2-2/5-5
LP6008191-DNA_A02	1	150	wt		wt			43	2.0/8.0	2/8	2-2/8-8
LP6008191-DNA_B02	1	150	wt		wt			43	2.0/3.83333	2/2	2-2/2-2
LP6008191-DNA_G02	1	150	wt		wt			44	2.0/5.0	2/5	2-2/5-5
LP6008191-DNA_H02	1	150	wt		wt			46	2.0	2/2	2-2/2-2
LP6008191-DNA_A03	1	150	long		long			48	2.0/2.33333	2/455	2-2/417-493
LP6008191-DNA_B03	1	150	long		long			47	2.0	2/402	2-2/366-439
LP6008191-DNA_F03	1	150	long		long			47	1.33333/8.0	8/683	8-8/637-732
LP6008191-DNA_G03	1	150	wt		wt			41	2.0/5.0	2/5	2-2/5-5
LP6008191-DNA_H03	1	150	wt		wt			40	2.0	2/2	2-2/2-2
LP6008191-DNA_A04	1	150	wt		wt			44	5.0/10.0	5/10	5-5/10-10
LP6008191-DNA_B04	1	150	wt		wt			43	3.0/8.0	8/13	8-8/13-13
LP6008191-DNA_F04	1	150	wt		wt			43	0.333333/5.0	5/7	5-5/7-7
LP6008191-DNA_G04	1	150	wt		wt			41	8.0	8/8	8-8/8-8
LP6008191-DNA_H04	1	150	wt		wt			42	2.0	2/2	2-2/2-2
LP6008191-DNA_A05	1	150	long		long			43	2.0/5.33333	2/363	2-2/328-400
LP6008191-DNA_B05	1	150	wt		wt			42	2.0	2/2	2-2/2-2
LP6008191-DNA_F05	1	150	wt		wt			42	2.0	2/2	2-2/2-2
LP6008191-DNA_G05	1	150	wt		wt			41	2.0/6.0	2/6	2-2/6-6
LP6008191-DNA_H05	1	150	wt		wt			49	2.0	2/2	2-2/2-2
LP6008191-DNA_A06	1	150	wt		wt			47	6.0	6/14	6-6/14-16
LP6008191-DNA_B06	1	150	wt		wt			45	2.0/8.0	2/8	2-2/8-8
LP6008191-DNA_F06	1	150	wt		wt			45	2.0	2/2	2-2/2-2
LP6008191-DNA_G06	1	150	wt		wt			45	2.0/5.0	2/5	2-2/5-5
LP6008191-DNA_H06	1	150	wt		wt			48	2.0/10.0	2/10	2-2/10-10
LP6008191-DNA_A07	1	150	wt		wt			44	2.0	2/2	2-2/2-2
LP6008191-DNA_B07	1	150	wt		wt			49	3.0/8.0	8/13	8-8/13-13
LP6008191-DNA_F07	1	150	wt		wt			47	2.0/5.0	2/5	2-2/5-5
LP6008191-DNA_G07	1	150	wt		wt			49	5.0/8.0	5/8	5-5/8-8
LP6008191-DNA_A08	1	150	wt		wt			47	2.0/5.0	2/5	2-2/5-5
LP6008191-DNA_B08	1	150	wt		wt			48	8.0	8/12	8-8/12-12
LP6008191-DNA_F08	1	150	wt		wt			46	2.0/8.0	2/8	2-2/8-8
LP6008191-DNA_G08	1	150	wt		wt			37	2.0/8.0	2/8	2-2/8-8
LP6008191-DNA_A09	1	150	long		long			45	10.0	10/579	10-10/533-624
LP6008191-DNA_B09	1	150	wt		wt			45	5.0/8.0	5/8	5-5/8-8
LP6008191-DNA_F09	1	150	wt		wt			58	2.0	2/2	2-2/2-2
LP6008191-DNA_G09	1	150	wt		wt			43	2.0	2/2	2-2/2-2
LP6008191-DNA_H09	1	150	wt		wt			42	2.0	2/9	2-2/9-9
LP6008191-DNA_A10	1	150	wt		wt			55	2.0/5.0	2/5	2-2/5-5
LP6008191-DNA_B10	1	150	wt		wt			40	2.0/7.0	2/7	2-2/7-7
LP6008191-DNA_F10	1	150	wt		wt			40	5.0	5/5	5-5/5-5
LP6008191-DNA_G10	1	150	wt		wt			42	2.0	2/2	2-2/2-2
LP6008191-DNA_H10	1	150	wt		wt			44	2.0/8.0	2/8	2-2/8-8
LP6008191-DNA_A11	1	150	wt		wt			43	2.0/7.0	2/7	2-2/7-7
LP6008191-DNA_B11	1	150	long		long			37	5.0/8.33333	5/303	5-5/268-338
LP6008191-DNA_F11	1	150	wt		wt			45	2.0/10.0	2/10	2-2/10-10
LP6008191-DNA_G11	1	150	wt		wt			38	2.0/6.0	2/6	2-2/6-6
LP6008191-DNA_H11	1	150	wt		wt			44	2.0/8.0	2/8	2-2/8-8
LP6008191-DNA_A12	1	150	wt		wt			60	2.0/5.0	2/5	2-2/5-5
LP6008191-DNA_F12	1	150	wt		wt			41		12/15	12-12/15-15
LP6008191-DNA_G12	1	150	wt		wt			43	2.0/6.0	2/6	2-2/6-6
LP6008191-DNA_H12	1	150	wt		wt			37	5.0	5/5	5-5/5-5
LP6008192-DNA_A01	1	150	wt		wt			58	2.0	2/2	2-2/2-2
LP6008192-DNA_C01	1	150	wt		wt			46	2.0/10.0	2/10	2-2/10-10
LP6008192-DNA_D01	1	150	wt		wt			40	2.0/6.0	2/6	2-2/6-6
LP6008192-DNA_E01	1	150	wt		wt			46	2.0/7.0	2/7	2-2/7-7
LP6008192-DNA_H01	1	150	wt		wt			47	2.0	2/2	2-2/2-2
LP6008192-DNA_A02	1	150	long		long			43	5.0/5.33333	5/404	5-5/366-442
LP6008192-DNA_C02	1	150	wt		wt			40	2.0/4.33333	2/14	2-2/14-14
LP6008192-DNA_D02	1	150	wt		wt			48	8.0	8/8	8-8/8-8
LP6008192-DNA_E02	1	150	long		long			41	2.0	2/506	2-2/461-550
LP6008192-DNA_H02	1	150	wt		wt			47	1.33333/5.0	5/5	5-5/5-5
LP6008192-DNA_A03	1	150	wt		wt			48	4.0/5.0	4/5	4-4/5-5
LP6008192-DNA_C03	1	150	long		long			47	2.0	2/330	2-2/297-363
LP6008192-DNA_D03	1	150	wt		wt			39	2.0/6.0	2/6	2-2/6-6
LP6008192-DNA_E03	1	150	wt		wt			38	2.0/8.0	2/8	2-2/8-8
LP6008192-DNA_H03	1	150	wt		wt			46	2.0	2/2	2-2/2-2
LP6008192-DNA_A04	1	150	wt		wt			48	2.0	2/2	2-2/2-2
LP6008192-DNA_C04	1	150	wt		wt			46	5.0	5/5	5-5/5-5
LP6008192-DNA_D04	1	150	wt		wt			46	2.0/5.0	2/5	2-2/5-5
LP6008192-DNA_E04	1	150	wt		wt			42	2.0/10.0	2/10	2-2/10-10
LP6008192-DNA_H04	1	150	wt		wt			43	2.0	2/2	2-2/2-2
LP6008192-DNA_A05	1	150	wt		wt			45	2.0/5.0	2/5	2-2/5-5
LP6008192-DNA_C05	1	150	wt		wt			45	2.0	2/2	2-2/2-2
LP6008192-DNA_D05	1	150	wt		wt			45	2.0/5.0	2/5	2-2/5-5
LP6008192-DNA_E05	1	150	wt		wt			42	5.0	5/5	5-5/5-5
LP6008192-DNA_H05	1	150	wt		wt			44	5.0/8.0	5/8	5-5/8-8
LP6008192-DNA_A06	1	150	wt		wt			47	2.0/5.0	2/5	2-2/5-5
LP6008192-DNA_C06	1	150	long		long			41	8.0	8/229	8-8/200-258
LP6008192-DNA_D06	1	150	wt		wt			43	2.0	2/2	2-2/2-2
LP6008192-DNA_E06	1	150	wt		wt			46	2.0/5.0	2/5	2-2/5-5
LP6008192-DNA_H06	1	150	wt		wt			50	2.0/8.0	2/8	2-2/8-8
LP6008192-DNA_A07	1	150	wt		wt			48	5.0	5/5	5-5/5-5
LP6008192-DNA_C07	1	150	wt		wt			48	2.0	2/2	2-2/2-2
LP6008192-DNA_D07	1	150	wt		wt			40	2.0/9.83333	2/8	2-2/8-8
LP6008192-DNA_E07	1	150	wt		wt			45	2.0/5.0	2/5	2-2/5-5
LP6008192-DNA_H07	1	150	wt		wt			41	2.0	2/2	2-2/2-2
LP6008192-DNA_A08	1	150	wt		wt			37	2.0/6.0	2/6	2-2/6-6
LP6008192-DNA_C08	1	150	wt		wt			44	2.0/8.0	2/8	2-2/8-8
LP6008192-DNA_D08	1	150	wt		wt			39	2.0	2/2	2-2/2-2
LP6008192-DNA_E08	1	150	wt		wt			45	2.0/5.0	2/5	2-2/5-5
LP6008192-DNA_H08	1	150	wt		wt			49	2.0/5.0	2/5	2-2/5-5
LP6008192-DNA_A09	1	150	wt		wt			46	2.0/5.0	2/5	2-2/5-5
LP6008192-DNA_C09	1	150	wt		wt			48	2.0/6.0	2/6	2-2/6-6
LP6008192-DNA_E09	1	150	wt		wt			50	2.0	2/12	2-2/12-12
LP6008192-DNA_H09	1	150	wt		wt			45	2.0/11.0	2/11	2-2/11-11
LP6008192-DNA_A10	1	150	wt		wt			48	2.16667/5.0	5/5	5-5/5-5
LP6008192-DNA_C10	1	150	wt		wt			48	2.0/10.0	2/10	2-2/10-10
LP6008192-DNA_D10	1	150	long		long			43	2.0	2/331	2-2/296-364
LP6008192-DNA_E10	1	150	wt		wt			45	2.0/5.0	2/5	2-2/5-5
LP6008192-DNA_H10	1	150	wt		wt			48	2.0/11.0	2/11	2-2/11-11
LP6008192-DNA_A11	1	150	wt		wt			44	1.33333/7.0	7/10	7-7/10-10
LP6008192-DNA_C11	1	150	wt		wt			49	2.0	2/2	2-2/2-2
LP6008192-DNA_D11	1	150	wt		wt			45	2.16667/5.0	5/18	5-5/18-18
LP6008192-DNA_E11	1	150	wt		wt			48	2.0/10.0	2/10	2-2/10-10
LP6008192-DNA_H11	1	150	wt		wt			49	5.0	5/5	5-5/5-5
LP6008192-DNA_A12	1	150	wt		wt			48	8.0	8/8	8-8/8-8
LP6008192-DNA_C12	1	150	wt		wt			46	5.0/6.0	5/6	5-5/6-6
LP6008192-DNA_D12	1	150	wt		wt			36	2.0/4.0	2/4	2-2/4-4
LP6008192-DNA_E12	1	150	wt		wt			50	5.0	5/5	5-5/5-5
LP6008192-DNA_G12	1	150	wt		wt			48	2.0/6.0	2/6	2-2/6-6
LP6008192-DNA_H12	1	150	wt		wt			46	2.0	2/2	2-2/2-2
LP6008193-DNA_A01	1	150	wt		wt			48	2.0/4.0	2/4	2-2/4-4
LP6008193-DNA_B01	1	150	wt		wt			41	5.0	5/5	5-5/5-5
LP6008193-DNA_C01	1	150	wt		wt			43	1.33333/11.0	11/12	11-11/12-12
LP6008193-DNA_F01	1	150	wt		wt			42	2.0	2/6	2-2/6-7
LP6008193-DNA_H01	1	150	wt		wt			46	2.0/8.0	2/8	2-2/8-8
LP6008193-DNA_A02	1	150	wt		wt			46	2.0	2/2	2-2/2-2
LP6008193-DNA_B02	1	150	wt		wt			46	4.0/5.0	4/5	4-4/5-5
LP6008193-DNA_C02	1	150	wt		wt			43	2.0/4.0	2/4	2-2/4-4
LP6008193-DNA_F02	1	150	wt		wt			41	2.0	2/2	2-2/2-2
LP6008193-DNA_G02	1	150	wt		wt			44	2.0/8.0	2/8	2-2/8-8
LP6008193-DNA_A03	1	150	wt		wt			43	2.0	2/12	2-2/12-12
LP6008193-DNA_B03	1	150	wt		wt			43	2.0	2/15	2-2/15-15
LP6008193-DNA_C03	1	150	wt		wt			42	2.0/8.0	2/8	2-2/8-8
LP6008193-DNA_F03	1	150	wt		wt			42	2.33333/7.0	7/8	7-7/8-8
LP6008193-DNA_G03	1	150	wt		wt			43	5.0/8.0	5/8	5-5/8-8
LP6008193-DNA_H03	1	150	wt		wt			43	2.0	2/2	2-2/2-2
LP6008193-DNA_B04	1	150	wt		wt			37	2.0/8.0	2/8	2-2/8-8
LP6008193-DNA_C04	1	150	wt		wt			42	2.0/6.0	2/6	2-2/6-6
LP6008193-DNA_G04	1	150	wt		wt			43	2.0/8.0	2/8	2-2/8-8
LP6008193-DNA_H04	1	150	wt		wt			44	2.0/5.0	2/5	2-2/5-5
LP6008193-DNA_A05	1	150	wt		wt			43	2.0/8.0	2/8	2-2/8-8
LP6008193-DNA_B05	1	150	wt		wt			45	2.0/5.0	2/5	2-2/5-5
LP6008193-DNA_C05	1	150	wt		wt			42	2.0	2/13	2-2/13-13
LP6008193-DNA_F05	1	150	wt		wt			40	3.0/11.0	2/11	2-2/11-11
LP6008193-DNA_G05	1	150	wt		wt			44	2.0/6.0	2/6	2-2/6-6
LP6008193-DNA_H05	1	150	wt		wt			40	2.0/8.0	2/8	2-2/8-8
LP6008113-DNA_A01	1	150	wt		wt			49	2.0	2/2	2-2/2-2
LP6008113-DNA_D01	1	150	wt		wt			50	2.0/8.0	2/8	2-2/8-8
LP6008113-DNA_E01	1	150	wt		wt			48	2.0	2/2	2-2/2-2
LP6008113-DNA_G01	1	150	wt		wt			47	2.0	2/2	2-2/2-2
LP6008113-DNA_H01	1	150	wt		wt			44	2.0	2/2	2-2/2-2
LP6008113-DNA_A02	1	150	wt		wt			46	1.33333/5.0	5/6	5-5/6-6
LP6008113-DNA_E02	1	150	wt		wt			45	5.0/6.0	5/6	5-5/6-6
LP6008113-DNA_G02	1	150	wt		wt			48	5.0/10.0	5/10	5-5/10-10
LP6008113-DNA_H02	1	150	wt		wt			44	5.0/8.0	5/8	5-5/8-8
LP6008113-DNA_D03	1	150	wt		wt			49	2.0	2/2	2-2/2-2
LP6008113-DNA_E03	1	150	wt		wt			45	2.0/8.0	2/8	2-2/8-8
LP6008113-DNA_G03	1	150	wt		wt			49	5.16667/10.0	10/10	10-10/10-10
LP6008113-DNA_H03	1	150	wt		wt			47	2.0/10.0	2/10	2-2/10-10
LP6008113-DNA_D04	1	150	long		long			48	2.0	2/482	2-2/443-523
LP6008113-DNA_E04	1	150	wt		wt			50	2.0	2/2	2-2/2-2
LP6008113-DNA_G04	1	150	wt		wt			46	2.0/5.0	2/5	2-2/5-5
LP6008113-DNA_H04	1	150	wt		wt			44	2.0	2/2	2-2/2-2
LP6008113-DNA_A05	1	150	wt		wt			48	2.0/5.0	2/5	2-2/5-5
LP6008113-DNA_B05	1	150	wt		wt			50	2.0	2/12	2-2/12-12
LP6008113-DNA_E05	1	150	wt		wt			48	2.0	2/15	2-2/15-15
LP6008113-DNA_G05	1	150	wt		wt			49	2.0	2/2	2-2/2-2
LP6008113-DNA_H05	1	150	wt		wt			47	2.0	2/2	2-2/2-2
LP6008113-DNA_A06	1	150	wt		wt			47	2.0/6.0	2/6	2-2/6-6
LP6008113-DNA_B06	1	150	wt		wt			45	2.0	2/2	2-2/2-2
LP6008113-DNA_D06	1	150	wt		wt			46	7.0/8.0	7/8	7-7/8-8
LP6008113-DNA_E06	1	150	wt		wt			44	5.0/8.0	5/8	5-5/8-8
LP6008113-DNA_G06	1	150	wt		wt			45	2.0	2/2	2-2/2-2
LP6008113-DNA_H06	1	150	wt		wt			45	2.0/10.0	2/10	2-2/10-10
LP6008113-DNA_A07	1	150	wt		wt			45	2.0/8.0	2/8	2-2/8-8
LP6008113-DNA_G07	1	150	wt		wt			43	2.0	2/2	2-2/2-2
LP6008113-DNA_H07	1	150	long		long			43	2.0/2.33333	2/204	2-2/177-231
LP6008113-DNA_A08	1	150	long		long			42	2.0	2/191	2-2/165-217
LP6008113-DNA_D08	1	150	wt		wt			43	8.0	8/8	8-8/8-8
LP6008113-DNA_E08	1	150	wt		wt			48	2.0	2/12	2-2/12-12
LP6008113-DNA_G08	1	150	wt		wt			46	2.0/10.0	2/10	2-2/10-10
LP6008113-DNA_H08	1	150	wt		wt			46	2.33333/6.0	6/18	6-6/18-18
LP6008113-DNA_A09	1	150	wt		wt			48	2.0/5.0	2/5	2-2/5-5
LP6008113-DNA_B09	1	150	wt		wt			45	2.0/5.0	2/5	2-2/5-5
LP6008113-DNA_D09	1	150	wt		wt			46	2.0/8.0	2/8	2-2/8-8
LP6008113-DNA_E09	1	150	wt		wt			45	2.0/5.0	2/5	2-2/5-5
LP6008113-DNA_G09	1	150	long		long			43	3.0/8.0	8/107	8-8/90-124
LP6008113-DNA_H09	1	150	wt		wt			50	2.0/10.0	2/10	2-2/10-10
LP6008113-DNA_A10	1	150	wt		wt			49	2.0/8.0	2/8	2-2/8-8
LP6008113-DNA_B10	1	150	wt		wt			51	2.0	2/2	2-2/2-2
LP6008113-DNA_D10	1	150	long		long			49	5.0	5/508	5-5/467-548
LP6008113-DNA_E10	1	150	wt		wt			49	2.0/2.33333	2/28	2-2/25-31
LP6008113-DNA_G10	1	150	wt		wt			48	2.0/8.0	2/8	2-2/8-8
LP6008113-DNA_H10	1	150	wt		wt			46	2.0	2/27	2-2/25-29
LP6008113-DNA_A11	1	150	wt		wt			51	2.0	2/2	2-2/2-2
LP6008113-DNA_B11	1	150	wt		wt			42	2.0/10.0	2/10	2-2/10-10
LP6008113-DNA_D11	1	150	wt		wt			49	2.0	2/2	2-2/2-2
LP6008113-DNA_E11	1	150	wt		wt			49	3.0/8.0	3/8	3-3/8-8
LP6008113-DNA_G11	1	150	wt		wt			48	2.0/8.0	2/8	2-2/8-8
LP6008113-DNA_H11	1	150	wt		wt			63	2.0/5.0	2/5	2-2/5-5
LP6008113-DNA_A12	1	150	wt		wt			48	2.0	2/2	2-2/2-2
LP6008113-DNA_B12	1	150	wt		wt			45	5.0/8.0	5/8	5-5/8-8
LP6008113-DNA_D12	1	150	wt		wt			47	2.0	2/2	2-2/2-2
LP6008113-DNA_E12	1	150	wt		wt			46	2.0/8.0	2/8	2-2/8-8
LP6008113-DNA_G12	1	150	wt		wt			46	2.0	2/2	2-2/2-2
LP6008113-DNA_H12	1	150	wt		wt			48	2.0/8.0	2/8	2-2/8-8
LP6008114-DNA_B01	1	150	wt		wt			43	2.0/8.0	2/8	2-2/8-8
LP6008114-DNA_C01	1	150	wt		wt			43	2.0	2/2	2-2/2-2
LP6008114-DNA_E01	1	150	wt		wt			44	1.33333/6.0	5/6	5-5/6-6
LP6008114-DNA_F01	1	150	wt		wt			44	2.0	2/2	2-2/2-2
LP6008114-DNA_H01	1	150	wt		wt			43	4.0/5.0	4/5	4-4/5-5
LP6008114-DNA_B02	1	150	wt		wt			42	2.0/3.83333	2/2	2-2/2-2
LP6008114-DNA_C02	1	150	wt		wt			42	2.0	2/2	2-2/2-2
LP6008114-DNA_E02	1	150	wt		wt			41	2.0	2/2	2-2/2-2
LP6008114-DNA_F02	1	150	wt		wt			41	2.0	2/2	2-2/2-2
LP6008114-DNA_H02	1	150	wt		wt			42	2.0/10.0	2/10	2-2/10-10
LP6008114-DNA_B03	1	150	wt		wt			49	1.33333/2.0	2/17	2-2/17-17
LP6008114-DNA_C03	1	150	wt		wt			49	2.0/8.0	2/8	2-2/8-8
LP6008114-DNA_E03	1	150	wt		wt			50	5.0/8.0	5/8	5-5/8-8
LP6008114-DNA_H03	1	150	wt		wt			49	2.0	2/2	2-2/2-2
LP6008114-DNA_B04	1	150	wt		wt			48	2.0/8.0	2/8	2-2/8-8
LP6008114-DNA_C04	1	150	wt		wt			49	4.0/5.0	4/5	4-4/5-5
LP6008114-DNA_E04	1	150	wt		wt			51	2.0	2/2	2-2/2-2
LP6008114-DNA_F04	1	150	wt		wt			47	2.0/5.0	2/5	2-2/5-5
LP6008114-DNA_H04	1	150	wt		wt			48	2.0/5.0	2/5	2-2/5-5
LP6008114-DNA_B05	1	150	wt		wt			48	2.0	2/2	2-2/2-2
LP6008114-DNA_C05	1	150	wt		wt			45	2.0	2/2	2-2/2-2
LP6008114-DNA_E05	1	150	wt		wt			47	2.0/11.0	2/11	2-2/11-11
LP6008114-DNA_F05	1	150	wt		wt			48	2.0	2/2	2-2/2-2
LP6008114-DNA_H05	1	150	wt		wt			44	2.0	2/2	2-2/2-2
LP6008114-DNA_B06	1	150	wt		wt			51	5.0	5/5	5-5/5-5
LP6008114-DNA_C06	1	150	wt		wt			49	2.0	2/2	2-2/2-2
LP6008114-DNA_E06	1	150	wt		wt			48	2.0	2/2	2-2/2-2
LP6008114-DNA_F06	1	150	wt		wt			48	2.0/8.0	2/8	2-2/8-8
LP6008114-DNA_H06	1	150	long		long			49	2.0	2/238	2-2/211-265
LP6008114-DNA_B07	1	150	wt		wt			44	2.0	2/2	2-2/2-2
LP6008114-DNA_C07	1	150	wt		wt			47	2.0/6.0	2/6	2-2/6-6
LP6008114-DNA_E07	1	150	wt		wt			47	2.0	2/2	2-2/2-2
LP6008114-DNA_F07	1	150	wt		wt			45	2.0	2/2	2-2/2-2
LP6008114-DNA_H07	1	150	wt		wt			66	2.0/8.0	2/8	2-2/8-8
LP6008114-DNA_B08	1	150	wt		wt			44	2.0/10.0	2/10	2-2/10-10
LP6008114-DNA_C08	1	150	wt		wt			47	2.0	2/12	2-2/12-12
LP6008114-DNA_E08	1	150	long		long			44	2.0/2.33333	2/294	2-2/262-326
LP6008114-DNA_F08	1	150	long		long			43	2.33333/10.0	10/296	10-10/263-328
LP6008114-DNA_H08	1	150	long		long			44	2.0/3.0	2/325	2-2/292-359
LP6008114-DNA_B09	1	150	wt		wt			46	5.0	5/13	5-5/13-13
LP6008114-DNA_C09	1	150	long		long			43	1.33333/10.0	10/383	10-10/346-420
LP6008114-DNA_F09	1	150	long		long			47	2.0	2/266	2-2/237-294
LP6008114-DNA_H09	1	150	wt		wt			47	2.0/10.0	2/10	2-2/10-10
LP6008114-DNA_C10	1	150	wt		wt			46	2.33333/6.0	6/8	6-6/8-8
LP6008114-DNA_E10	1	150	wt		wt			48	2.0	2/2	2-2/2-2
LP6008114-DNA_F10	1	150	wt		wt			44	2.0/8.33333	2/16	2-2/16-16
LP6008114-DNA_H10	1	150	wt		wt			47	2.0	2/2	2-2/2-2
LP6008114-DNA_B11	1	150	long		long			42	2.0	2/239	2-2/211-268
LP6008114-DNA_C11	1	150	wt		wt			66	2.0	2/2	2-2/2-2
LP6008114-DNA_E11	1	150	wt		wt			46	2.0	2/2	2-2/2-2
LP6008114-DNA_F11	1	150	wt		wt			47	2.0/2.33333	2/16	2-2/16-16
LP6008114-DNA_H11	1	150	wt		wt			47	2.0	2/2	2-2/2-2
LP6008114-DNA_B12	1	150	wt		wt			45	2.0/4.0	2/4	2-2/4-4
LP6008114-DNA_C12	1	150	wt		wt			46	3.0/11.0	2/11	2-2/11-11
LP6008114-DNA_E12	1	150	wt		wt			43	2.0/5.0	2/5	2-2/5-5
LP6008114-DNA_F12	1	150	wt		wt			43	2.0	2/2	2-2/2-2
LP6008114-DNA_H12	1	150	wt		wt			46	2.0/6.83333	2/2	2-2/2-2
LP6008115-DNA_A01	1	150	wt		wt			46	2.0/6.0	2/6	2-2/6-6
LP6008115-DNA_C01	1	150	wt		wt			45	2.0/4.0	2/4	2-2/4-4
LP6008115-DNA_D01	1	150	wt		wt			44	2.0	2/2	2-2/2-2
LP6008115-DNA_F01	1	150	wt		wt			45	2.0/5.0	2/5	2-2/5-5
LP6008115-DNA_G01	1	150	wt		wt			46	7.0/8.0	7/8	7-7/8-8
LP6008115-DNA_A02	1	150	long		long			46	2.0	2/329	2-2/295-361
LP6008115-DNA_C02	1	150	wt		wt			44	2.0/10.0	2/10	2-2/10-10
LP6008115-DNA_D02	1	150	long		long			43	2.0	2/476	2-2/434-518
LP6008115-DNA_F02	1	150	wt		wt			50	2.0	2/2	2-2/2-2
LP6008115-DNA_G02	1	150	wt		wt			49	2.0/5.0	2/5	2-2/5-5
LP6008115-DNA_A03	1	150	wt		wt			49	2.0/5.0	2/5	2-2/5-5
LP6008115-DNA_C03	1	150	long		long			45	2.0	2/245	2-2/216-272
LP6008115-DNA_D03	1	150	wt		wt			46	2.33333/6.0	6/12	6-6/12-12
LP6008115-DNA_F03	1	150	wt		wt			46	5.0/7.0	5/7	5-5/7-7
LP6008115-DNA_G03	1	150	wt		wt			42	2.0	2/2	2-2/2-2
LP6008115-DNA_A04	1	150	wt		wt			42	2.0	2/2	2-2/2-2
LP6008115-DNA_C04	1	150	wt		wt			46	2.0/8.0	2/8	2-2/8-8
LP6008115-DNA_D04	1	150	wt		wt			49	2.0	2/2	2-2/2-2
LP6008115-DNA_G04	1	150	wt		wt			50	2.0/8.0	2/8	2-2/8-8
LP6008115-DNA_A05	1	150	long		long			47	1.33333/10.3333	18/504	18-18/464-544
LP6008115-DNA_C05	1	150	wt		wt			49	2.0	2/2	2-2/2-2
LP6008115-DNA_D05	1	150	long		long			51	1.33333/5.0	5/321	5-5/291-352
LP6008115-DNA_G05	1	150	wt		wt			41	2.0/5.0	2/5	2-2/5-5
LP6008115-DNA_A06	1	150	wt		wt			47	2.0	2/2	2-2/2-2
LP6008115-DNA_C06	1	150	wt		wt			49	2.0	2/2	2-2/2-2
LP6008115-DNA_D06	1	150	wt		wt			50	2.0/4.0	2/4	2-2/4-4
LP6008115-DNA_F06	1	150	wt		wt			44	2.0	2/2	2-2/2-2
LP6008115-DNA_G06	1	150	wt		wt			45	2.0/8.0	2/8	2-2/8-8
LP6008115-DNA_A07	1	150	wt		wt			45	2.0/8.0	2/8	2-2/8-8
LP6008115-DNA_C07	1	150	wt		wt			43	2.0/8.0	2/8	2-2/8-8
LP6008115-DNA_D07	1	150	wt		wt			45	2.0/5.0	2/5	2-2/5-5
LP6008115-DNA_F07	1	150	wt		wt			44	2.0/5.0	2/5	2-2/5-5
LP6008115-DNA_G07	1	150	wt		wt			45	2.0/5.0	2/5	2-2/5-5
LP6008115-DNA_A08	1	150	long		long			43		14/507	14-14/465-550
LP6008115-DNA_C08	1	150	long		long			44	3.0/5.0	5/319	5-5/285-351
LP6008115-DNA_D08	1	150	long		long			47	2.0	2/189	2-2/164-213
LP6008115-DNA_F08	1	150	wt		wt			55	4.0/5.0	4/5	4-4/5-5
LP6008115-DNA_G08	1	150	wt		wt			50	2.0/6.0	2/6	2-2/6-6
LP6008115-DNA_A09	1	150	wt		wt			48	2.33333/5.0	5/18	5-5/18-18
LP6008115-DNA_C09	1	150	wt		wt			49	5.0/8.0	5/8	5-5/8-8
LP6008115-DNA_D09	1	150	wt		wt			44	3.0/6.0	5/6	5-5/6-6
LP6008115-DNA_F09	1	150	wt		wt			49	2.0	2/2	2-2/2-2
LP6008115-DNA_G09	1	150	wt		wt			48	2.0	2/2	2-2/2-2
LP6008115-DNA_A10	1	150	wt		wt			38	2.0/2.33333	2/14	2-2/14-14
LP6008115-DNA_C10	1	150	wt		wt			48	2.0/5.0	2/5	2-2/5-5
LP6008115-DNA_D10	1	150	wt		wt			43	2.0	2/2	2-2/2-2
LP6008115-DNA_F10	1	150	wt		wt			42	2.0/5.0	2/5	2-2/5-5
LP6008115-DNA_G10	1	150	wt		wt			47	2.0	2/2	2-2/2-2
LP6008115-DNA_A11	1	150	wt		wt			49	2.0	2/2	2-2/2-2
LP6008115-DNA_C11	1	150	wt		wt			49	2.0	2/2	2-2/2-2
LP6008115-DNA_D11	1	150	wt		wt			49	5.0/8.0	5/8	5-5/8-8
LP6008115-DNA_F11	1	150	wt		wt			48	2.0	2/2	2-2/2-2
LP6008115-DNA_G11	1	150	long		long			47	3.0/8.0	8/542	8-8/500-584
LP6008115-DNA_A12	1	150	wt		wt			45	2.0/5.0	2/5	2-2/5-5
LP6008115-DNA_C12	1	150	wt		wt			45	2.16667/5.0	5/8	5-5/8-8
LP6008115-DNA_D12	1	150	wt		wt			49	1.66667/2.0	2/2	2-2/2-2
LP6008115-DNA_F12	1	150	wt		wt			51	2.0/8.0	2/8	2-2/8-8
LP6008115-DNA_G12	1	150	wt		wt			50	2.0/5.0	2/5	2-2/5-5
LP6008116-DNA_A01	1	150	wt		wt			45	2.0/3.0	2/2	2-2/2-2
LP6008116-DNA_B01	1	150	wt		wt			44	2.0	2/2	2-2/2-2
LP6008116-DNA_G01	1	150	wt		wt			48	2.0	2/2	2-2/2-2
LP6008116-DNA_A02	1	150	wt		wt			50	2.0	2/2	2-2/2-2
LP6008116-DNA_B02	1	150	wt		wt			44	2.0/10.0	2/10	2-2/10-10
LP6008116-DNA_D02	1	150	wt		wt			48	4.0/5.0	4/5	4-4/5-5
LP6008116-DNA_E02	1	150	wt		wt			44	2.0/11.0	2/11	2-2/11-11
LP6008116-DNA_G02	1	150	wt		wt			49	2.0	2/2	2-2/2-2
[truncated: 1,002 more rows]
