# Supplementary material for: Detection of long repeat expansions from PCR-free whole-genome sequence data
Source: Genome Res. 2017 Nov;27(11):1895–903. doi: 10.1101/gr.225672.117 (PMC5668946; doi:10.1101/gr.225672.117)
Supplement: Supplemental Material [file supp_gr.225672.117_Supplemental_Table_4.xlsx]

## Sheet: table-s4
Sample ID	Anchored IRR count	Size based on anchored IRRs	Cohort	Depth	EH genotype	EH genotype CI	LobSTR genotype	Original PCR	2nd PCR	Final PCR	Read length
LP6005616-DNA_A01	NA	NA	1	47	19/23	17-21/16-26		long	wt	wt, 20 repeats	100
LP6005874-DNA_E11	15	30	1	40	2/346	2-2/316-375	2.0	wt	long	long	100
LP6005869-DNA_G04	32	42	1	44	6/362	6-6/335-390	1.33333/3.0	wt	long	long	100
LP6008186-DNA_D04	42	81	1	38	5/1177	5-5/1106-1247	5.0	wt		long	150
LP6008186-DNA_C09	NA	NA	1	46	2/5	2-2/5-5	2.0/5.0	long		wt	150
LP6008118-DNA_G09	14	41	1	46	8/429	8-8/391-467	2.33333/8.0	8		long	150
LP6008123-DNA_G07	24	48	1	53	2/427	2-2/392-461	2.0/2.33333	2		long	150
LP6008234-DNA_B12	18	45	2	47	2/271	2-2/243-300	1.33333/2.0	2		long	150
LP6008240-DNA_A11	24	53	2	44	2/351	2-2/316-386	2.0	21		long	150
LP6008240-DNA_C02	13	41	2	43	2/343	2-2/308-379	2.0	22		long	150
LP6008240-DNA_E11	NA	NA	2	44	2/2	2-2/2-2	2.0	long		wt	150
