# Supplementary material for: Detection of long repeat expansions from PCR-free whole-genome sequence data
Source: Genome Res. 2017 Nov;27(11):1895–903. doi: 10.1101/gr.225672.117 (PMC5668946; doi:10.1101/gr.225672.117)
Supplement: Supplemental Material [file supp_gr.225672.117_Supplemental_Table_5.xlsx]

## Sheet: table-s5
Sample ID	Cohort	Read length	Original PCR	2nd PCR	Final PCR	SB repeat number	SB position	Depth	LobSTR genotype	EH genotype	EH genotype CI
LP6008118-DNA_C04	1	150	8		8			49	2.0	2/2	2-2/2-2
LP6008118-DNA_G09	1	150	8		long			46	2.33333/8.0	8/429	8-8/391-467
LP6008119-DNA_A08	1	150	8		8			46	2.0	2/2	2-2/2-2
LP6008119-DNA_A09	1	150	10		10			47	2.0	2/2	2-2/2-2
LP6008119-DNA_A12	1	150	8		8			44	2.0	2/2	2-2/2-2
LP6008119-DNA_C06	1	150	2		2			45	2.0/5.0	2/5	2-2/5-5
LP6008119-DNA_D05	1	150	2		2			48	2.0/6.0	2/6	2-2/6-6
LP6008119-DNA_G01	1	150	22		22			43	2.0/2.33333	2/26	2-2/25-27
LP6008120-DNA_C09	1	150	8		8			43	2.0	2/2	2-2/2-2
LP6008120-DNA_H07	1	150	5		5			47	5.0/8.0	5/8	5-5/8-8
LP6008121-DNA_C01	1	150	15		15			47	2.0	2/11	2-2/11-11
LP6008121-DNA_H05	1	150	5		5			44	1.66667/2.0	2/2	2-2/2-2
LP6008121-DNA_H09	1	150	19		19			47	5.0	5/17	5-5/17-17
LP6008122-DNA_A09	1	150	13		13			41	2.0	2/12	2-2/12-12
LP6008122-DNA_G10	1	150	16		16			45	3.0/5.0	5/17	5-5/17-17
LP6008123-DNA_C08	1	150	16		16			44	3.0/8.0	8/17	8-8/17-17
LP6008123-DNA_F08	1	150	21		21			49	5.0	5/27	5-5/25-29
LP6008123-DNA_G07	1	150	2		long			53	2.0/2.33333	2/427	2-2/392-461
LP6008124-DNA_A06	1	150	5		5			48	2.0	2/2	2-2/2-2
LP6008124-DNA_D03	1	150	18		18			49	2.0/2.33333	2/16	2-2/16-16
LP6008124-DNA_F12	1	150	9		9			47	2.0/5.0	2/5	2-2/5-5
LP6008125-DNA_A04	1	150	4		4			51	2.0/5.0	2/5	2-2/5-5
LP6008125-DNA_C12	1	150	9		9			42	2.0/2.33333	2/13	2-2/13-13
LP6008125-DNA_F03	1	150	16		16			48	2.0	2/17	2-2/17-17
LP6008234-DNA_B12	2	150	2		long			47	1.33333/2.0	2/271	2-2/243-300
LP6008234-DNA_E09	2	150	7		7			47	2.0/8.0	2/8	2-2/8-8
LP6008234-DNA_H06	2	150	22		22			46	2.0/2.33333	2/26	2-2/25-27
LP6008235-DNA_A07	2	150	21		21			44	2.33333	13/26	13-13/25-27
LP6008235-DNA_B08	2	150	12		12			44	2.0	2/13	2-2/13-13
LP6008235-DNA_G03	2	150	24		24			47	5.0	5/30	5-5/26-34
LP6008235-DNA_H11	2	150	13		13			47	2.0/11.1667	2/8	2-2/8-8
LP6008236-DNA_C02	2	150	9		9			49	5.0/10.0	5/10	5-5/10-10
LP6008236-DNA_G11	2	150	2		2			38	2.0	2/8	2-2/8-8
LP6008237-DNA_B10	2	150	18		18			45	3.0/7.0	7/27	7-7/25-29
LP6008237-DNA_G01	2	150	8		8			40	2.0	2/2	2-2/2-2
LP6008238-DNA_F05	2	150	22		22			47	2.0	2/23	2-2/23-23
LP6008239-DNA_B03	2	150	8		8			41	2.0	2/2	2-2/2-2
LP6008239-DNA_E08	2	150	7		7			43	2.0/5.0	2/5	2-2/5-5
LP6008240-DNA_A02	2	150	15		15			44	2.0	2/16	2-2/16-16
LP6008240-DNA_A11	2	150	21		long			44	2.0	2/351	2-2/316-386
LP6008240-DNA_C02	2	150	22		long			43	2.0	2/343	2-2/308-379
LP6008240-DNA_D02	2	150	10		10			45	2.0/11.0	2/11	2-2/11-11
LP6008240-DNA_D06	2	150	8		8			49	2.0	2/2	2-2/2-2
LP6008240-DNA_D10	2	150	7		7			47	2.0/8.0	2/8	2-2/8-8
