# Supplementary material for: Detection of long repeat expansions from PCR-free whole-genome sequence data
Source: Genome Res. 2017 Nov;27(11):1895–903. doi: 10.1101/gr.225672.117 (PMC5668946; doi:10.1101/gr.225672.117)
Supplement: Supplemental Material [file supp_gr.225672.117_Supplemental_Table_6.xlsx]

## Sheet: Sheet1
Sample ID	Read Depth	Indels	Singletons	SNVs	Ti/Tv
LP6005616-DNA_A02	47.8382	576493	18548	3488551	2.08072
LP6005616-DNA_A03	46.56	564699	18075	3475376	2.07602
LP6005616-DNA_A05	46.0664	574791	18996	3494353	2.07929
LP6005616-DNA_B02	46.6729	568031	18749	3492407	2.08126
LP6005616-DNA_B04	48.0433	591172	23859	3524548	2.07899
LP6005616-DNA_C01	47.7559	578028	18555	3490111	2.07935
LP6005616-DNA_C03	44.9432	566725	19027	3489812	2.08016
LP6005616-DNA_C04	44.1587	583364	19827	3491567	2.08044
LP6005616-DNA_C10	48.6918	570802	18670	3493551	2.08043
LP6005616-DNA_D02	46.2416	564601	16575	3473707	2.07762
LP6005616-DNA_D04	53.1049	613238	36779	3656340	2.08047
LP6005616-DNA_E01	50.7447	578999	18677	3486895	2.07847
LP6005616-DNA_F01	57.6479	581325	18754	3481715	2.07857
LP6005616-DNA_F02	47.8216	574133	17612	3489342	2.07951
LP6005616-DNA_F10	49.1143	570447	17183	3485105	2.07878
LP6005616-DNA_G01	47.7688	573577	19362	3483058	2.08083
LP6005616-DNA_H01	46.3412	572107	20275	3496272	2.07714
LP6005616-DNA_H04	50.3741	579041	16740	3483849	2.08101
LP6005617-DNA_D03	43.8866	573513	20411	3499557	2.07962
LP6005617-DNA_E03	43.1549	570718	18237	3492990	2.07657
LP6005616-DNA_A01	47.0702	574814	18139	3496819	2.08135
LP6005616-DNA_B01	46.112	580581	18334	3486938	2.08001
LP6005616-DNA_D10	51.932	578134	16913	3492798	2.07951
LP6005616-DNA_E02	45.7636	570352	19524	3493642	2.07921
LP6005616-DNA_G02	49.582	591717	34883	3590623	2.07797
LP6005616-DNA_H02	48.4001	570787	17275	3470383	2.0805
LP6005616-DNA_H11	50.2445	572244	19380	3476919	2.08204
LP6005617-DNA_A02	55.4851	584848	17735	3488410	2.08104
LP6005617-DNA_A07	50.3276	574665	18474	3492201	2.08078
LP6005617-DNA_B07	44.7912	567712	16882	3487160	2.07981
LP6005617-DNA_C07	46.4272	572394	16691	3482699	2.07789
LP6005617-DNA_C09	45.0458	561998	18226	3484820	2.0799
LP6005617-DNA_D07	47.9273	579569	18311	3523636	2.07833
LP6005617-DNA_D08	45.0716	567146	19946	3478632	2.08149
LP6005617-DNA_D09	53.6947	568400	17482	3457519	2.08151
LP6005617-DNA_E01	51.3029	584241	18036	3476170	2.08116
LP6005617-DNA_E06	45.7619	571324	19545	3480889	2.07702
LP6005617-DNA_E07	44.5459	571054	20563	3494187	2.07839
LP6005617-DNA_E08	46.3017	570755	18472	3498031	2.0788
LP6005617-DNA_F06	47.8017	576954	17750	3474029	2.08228
LP6005617-DNA_F07	51.2626	579565	17059	3481544	2.08151
LP6005617-DNA_F08	45.5308	563720	21273	3473383	2.0804
LP6005617-DNA_F09	48.7248	571906	18239	3490669	2.08085
LP6005617-DNA_G06	50.0756	581676	17944	3468076	2.07882
LP6005617-DNA_G09	45.4952	574536	20721	3498618	2.07958
LP6005616-DNA_A04	52.9599	585849	17891	3478799	2.07806
LP6005616-DNA_D03	46.4075	558220	18793	3480085	2.07885
LP6005616-DNA_E03	46.9663	557233	18518	3485160	2.07962
LP6005616-DNA_E11	52.4955	567893	19603	3472985	2.0821
LP6005616-DNA_F03	47.8525	569025	19417	3484474	2.07939
LP6005616-DNA_G11	48.7399	570325	19401	3497373	2.08119
LP6005616-DNA_H03	51.3134	590013	17426	3502934	2.07966
LP6005616-DNA_H10	53.3056	568747	18522	3480444	2.08032
LP6005617-DNA_A03	47.2448	575002	18826	3483777	2.07828
LP6005617-DNA_A04	43.4988	579950	19333	3482337	2.0799
LP6005617-DNA_A05	43.0338	569907	18375	3481858	2.07842
LP6005617-DNA_A10	44.205	554755	18231	3482770	2.07864
LP6005617-DNA_B02	51.8299	583201	17349	3486303	2.07777
LP6005617-DNA_B03	42.705	574856	17286	3510361	2.07945
LP6005617-DNA_B06	40.5016	548187	21731	3486786	2.07966
LP6005617-DNA_B08	40.9047	567270	17422	3488604	2.07892
LP6005617-DNA_C02	34.9679	550160	17285	3489456	2.07987
LP6005617-DNA_C03	46.4742	570677	17619	3477711	2.08252
LP6005617-DNA_C04	41.8809	582720	18923	3492958	2.08096
LP6005617-DNA_C06	46.8219	573315	18383	3484231	2.07964
LP6005617-DNA_C08	43.9565	567913	18280	3498304	2.07784
LP6005617-DNA_D04	41.4374	566050	18683	3490031	2.07766
LP6005617-DNA_E02	46.2793	566745	18117	3491526	2.07653
LP6005617-DNA_F04	39.6587	546454	17067	3475952	2.0789
LP6005617-DNA_G03	42.5947	558031	19644	3475288	2.07891
LP6005617-DNA_G04	40.7419	562580	59833	3553871	2.07452
LP6005617-DNA_G05	43.423	556921	21036	3469048	2.08106
LP6005617-DNA_H03	43.8628	568646	17854	3482932	2.07962
LP6005617-DNA_H04	42.0281	563894	18445	3470694	2.07902
LP6005617-DNA_H05	40.3928	559802	20222	3503292	2.08157
LP6005616-DNA_A07	43.7354	576469	18723	3472017	2.08044
LP6005616-DNA_D07	43.545	574968	18489	3484457	2.08053
LP6005617-DNA_A11	44.0378	569489	16798	3486856	2.08053
LP6005617-DNA_B11	46.1109	571241	16896	3481502	2.07848
LP6005617-DNA_F01	57.7211	581542	18226	3473215	2.07848
LP6005617-DNA_G01	58.3014	573680	18299	3485525	2.07902
LP6005617-DNA_H01	52.1309	572835	17360	3488134	2.07921
LP6005618-DNA_A05	44.4315	575045	18907	3471728	2.07646
LP6005618-DNA_A08	41.114	546551	21562	3464275	2.07765
LP6005618-DNA_A11	43.2981	570088	18435	3467554	2.08262
LP6005618-DNA_B08	38.0377	548947	16679	3477335	2.07747
LP6005618-DNA_C06	42.9102	561970	17959	3482503	2.08011
LP6005618-DNA_D12	42.317	558509	18892	3475353	2.07696
LP6005618-DNA_E07	47.9574	572553	19109	3491669	2.07834
LP6005618-DNA_F04	48.0492	579055	18676	3493932	2.07844
LP6005618-DNA_F07	46.0346	571820	18235	3492076	2.07907
LP6005618-DNA_G04	50.6955	571097	16517	3449918	2.0757
LP6005618-DNA_H07	42.0029	553800	19446	3500054	2.07873
LP6005620-DNA_A01	41.2816	562027	17104	3482863	2.07792
LP6005616-DNA_B09	34.3297	541221	17816	3480061	2.08066
LP6005617-DNA_C10	45.8394	563798	20811	3478903	2.08005
LP6005617-DNA_E10	47.7387	569625	19128	3498707	2.07871
LP6005617-DNA_F03	40.3708	563226	17433	3484867	2.07948
LP6005617-DNA_F05	37.8059	556814	27060	3492252	2.08051
LP6005617-DNA_F10	46.943	576071	19071	3497120	2.07848
LP6005617-DNA_G10	47.9512	578241	17869	3498659	2.07771
LP6005617-DNA_H09	46.3047	567797	18171	3495028	2.08029
LP6005617-DNA_H10	47.2057	575610	18139	3492852	2.08062
LP6005618-DNA_A01	49.9943	570523	17834	3495261	2.07861
LP6005618-DNA_A02	47.254	562419	16006	3474417	2.07973
LP6005618-DNA_B01	47.8526	570264	20323	3491009	2.08107
LP6005618-DNA_C01	49.4602	571853	17589	3476667	2.08224
LP6005618-DNA_C09	46.8679	569484	17385	3492823	2.07901
LP6005618-DNA_F02	49.5434	578288	18817	3475601	2.08109
LP6005618-DNA_G01	49.548	569869	17224	3496486	2.08161
LP6005618-DNA_G02	46.8151	570584	18039	3493336	2.08431
LP6005621-DNA_A05	49.6159	566333	25226	3460432	2.07767
LP6005621-DNA_A12	37.7994	548163	18236	3502453	2.08272
LP6005621-DNA_B12	42.8009	564007	15605	3457350	2.08038
LP6005621-DNA_D12	46.2573	570749	20800	3495877	2.07811
LP6005621-DNA_E05	39.8024	546116	18550	3490033	2.0816
LP6005621-DNA_E12	42.402	562763	19987	3483373	2.07968
LP6005616-DNA_G06	43.8287	574064	17617	3462258	2.07828
LP6005618-DNA_B05	42.6446	566422	18410	3473153	2.07859
LP6005618-DNA_B06	42.8402	563012	18076	3474731	2.07717
LP6005618-DNA_C03	42.1882	549735	16936	3485519	2.08102
LP6005618-DNA_C05	45.4796	568950	18221	3486605	2.08136
LP6005618-DNA_C11	43.7654	571214	19698	3503235	2.07806
LP6005618-DNA_D04	46.9149	571745	18236	3489183	2.08024
LP6005618-DNA_E04	47.8256	573544	21464	3498629	2.07691
LP6005618-DNA_E11	42.3744	554168	18154	3465701	2.08055
LP6005618-DNA_F05	42.8013	568143	18766	3484732	2.08019
LP6005618-DNA_F11	41.3516	556615	17949	3489128	2.08044
LP6005618-DNA_G10	45.2222	559783	17817	3473785	2.08239
LP6005618-DNA_G11	43.7826	556237	18110	3483564	2.07816
LP6005618-DNA_H02	44.7181	550695	18003	3491834	2.08256
LP6005618-DNA_H10	42.3373	560431	19444	3488014	2.07993
LP6005616-DNA_A09	53.256	583248	20877	3490289	2.07884
LP6005617-DNA_C11	47.0291	568959	19908	3477577	2.07742
LP6005617-DNA_D06	39.6992	563820	17665	3465174	2.08028
LP6005617-DNA_D11	46.0454	572031	17726	3479426	2.0805
LP6005617-DNA_D12	45.6415	570108	18695	3496064	2.0803
LP6005617-DNA_E11	47.3155	573471	21112	3481556	2.0782
LP6005617-DNA_E12	50.6612	573655	18475	3484542	2.07817
LP6005617-DNA_F11	47.569	575693	17392	3490776	2.08129
LP6005617-DNA_F12	46.2067	568974	19293	3495659	2.08009
LP6005617-DNA_G11	46.2118	575217	18820	3500856	2.07905
LP6005617-DNA_G12	46.9895	573277	18969	3489760	2.08199
LP6005618-DNA_A03	43.3065	553083	17531	3486380	2.07937
LP6005618-DNA_A07	46.1643	572615	18559	3485934	2.07913
LP6005618-DNA_B03	42.4878	555759	30480	3541659	2.07863
LP6005618-DNA_B04	43.5514	557141	17721	3492042	2.08141
LP6005618-DNA_B07	43.0397	563687	17322	3462912	2.08032
LP6005618-DNA_B12	38.1062	553251	17066	3481751	2.07944
LP6005618-DNA_C07	45.1771	569389	19872	3486864	2.07987
LP6005618-DNA_D01	50.7216	581442	21933	3481908	2.07736
LP6005618-DNA_D02	45.0032	581637	18665	3494893	2.0809
LP6005618-DNA_D03	41.0541	554711	36295	3534239	2.08123
LP6005618-DNA_D07	46.4035	569985	18859	3475456	2.08118
LP6005618-DNA_D08	40.3451	561883	21546	3468220	2.07972
LP6005618-DNA_E01	49.1176	577631	17709	3469030	2.0797
LP6005618-DNA_E06	46.3585	570396	17730	3489725	2.07955
LP6005618-DNA_F03	42.132	565858	18878	3490049	2.07937
LP6005618-DNA_G03	43.985	567110	18621	3488181	2.07981
LP6005618-DNA_G05	47.6079	575361	19956	3496319	2.08172
LP6005618-DNA_G06	44.3046	569794	18810	3488681	2.07842
LP6005618-DNA_H03	47.6322	571427	19147	3501261	2.07905
LP6005618-DNA_H06	44.7388	579352	43333	3571723	2.07475
LP6005618-DNA_H12	41.6088	566970	18563	3514402	2.08124
LP6005621-DNA_A10	46.5579	564915	17928	3476352	2.07693
LP6005621-DNA_A11	44.5954	573761	19354	3485749	2.07901
LP6005621-DNA_B10	34.2555	527842	17006	3464708	2.08026
LP6005621-DNA_C06	51.8347	570426	21783	3502462	2.07988
LP6005621-DNA_C11	44.4118	578681	19308	3496473	2.08141
LP6005621-DNA_D10	36.0603	532909	16800	3469616	2.0811
LP6005621-DNA_E07	49.2149	569505	16318	3454657	2.07892
LP6005621-DNA_E10	41.4094	563640	18335	3502086	2.08041
LP6005621-DNA_E11	43.8468	565184	19794	3477807	2.0798
LP6005621-DNA_F12	45.6037	571122	17802	3510057	2.07694
LP6005621-DNA_G06	57.0197	582334	17525	3484442	2.07914
LP6005621-DNA_G07	40.6456	566063	18289	3494270	2.08103
LP6005621-DNA_G09	51.1179	579388	18653	3465133	2.08203
LP6005621-DNA_H06	45.7498	577477	19455	3484135	2.08227
LP6005617-DNA_H02	45.3877	565006	17955	3475955	2.08071
LP6005620-DNA_H04	38.0179	572180	40357	3544612	2.08012
LP6005621-DNA_H10	46.2229	570961	18376	3471108	2.07987
LP6005621-DNA_A09	48.6613	591887	18997	3496550	2.08203
LP6005621-DNA_D09	44.0167	567543	18785	3492517	2.07989
LP6005617-DNA_G07	53.6063	579153	21110	3507666	2.07812
LP6005618-DNA_E08	42.9981	559003	17758	3497005	2.07846
LP6005618-DNA_H08	40.3901	559802	20777	3482698	2.07705
LP6005621-DNA_D01	47.7094	571189	17770	3477771	2.08058
LP6005618-DNA_H09	37.1943	551960	17257	3471572	2.08045
LP6005621-DNA_C09	48.4516	567192	18885	3482117	2.07907
LP6005621-DNA_B09	47.0322	584333	19944	3489610	2.07974
LP6005616-DNA_F12	48.849	568347	18217	3481881	2.08334
LP6005621-DNA_C01	48.6407	577240	19053	3492199	2.08078
LP6005617-DNA_C01	51.4273	588525	20246	3495958	2.08016
LP6005618-DNA_F10	42.8221	559600	15440	3496533	2.0789
LP6005621-DNA_C12	44.7184	570319	20265	3482522	2.07877
LP6005621-DNA_G10	46.0905	581311	36945	3546071	2.07829
LP6005621-DNA_G11	41.2613	546123	18495	3498875	2.0788
LP6005621-DNA_H12	48.38	567400	15602	3469852	2.07996
LP6005615-DNA_B08	49.5612	571906	17227	3478311	2.08084
LP6005615-DNA_B09	47.1417	575773	21244	3501874	2.08094
LP6005615-DNA_C11	51.4601	576368	12010	3478146	2.0784
LP6005615-DNA_D07	56.4845	578224	19848	3492107	2.07898
LP6005615-DNA_D11	50.1729	580501	12023	3501817	2.07919
LP6005615-DNA_E06	37.6595	555087	18555	3489992	2.08098
LP6005615-DNA_F06	44.4429	561747	19133	3482140	2.08161
LP6005615-DNA_F10	43.3109	555256	12215	3492473	2.08096
LP6005615-DNA_A10	54.0763	580421	18954	3486576	2.07782
LP6005615-DNA_F09	47.9962	572984	18062	3486886	2.08011
LP6005615-DNA_G08	47.3021	560843	17211	3471093	2.08158
LP6005615-DNA_D10	48.2964	575021	19093	3486534	2.07888
LP6005615-DNA_A11	48.5316	564224	12018	3482332	2.07804
LP6005615-DNA_E10	47.0165	572345	12043	3497556	2.08243
LP6005615-DNA_A06	52.2177	573050	18827	3485403	2.07912
LP6005615-DNA_B06	48.9686	574668	21944	3501565	2.07875
LP6005615-DNA_A02	52.2328	584176	17272	3504203	2.07839
LP6005615-DNA_A05	47.2945	572544	18130	3468943	2.07904
LP6005615-DNA_B03	43.938	567750	19487	3492979	2.08
LP6005615-DNA_C01	41.3078	572571	18506	3480212	2.08058
LP6005615-DNA_D03	39.9077	564981	18668	3498634	2.07987
LP6005615-DNA_D04	42.9728	566479	18060	3471301	2.08197
LP6005615-DNA_D05	49.4677	573280	19173	3478631	2.07696
LP6005615-DNA_E04	41.3789	574385	19566	3500204	2.08246
LP6005615-DNA_G02	47.2608	580068	23169	3510500	2.07858
LP6005615-DNA_G04	49.1658	580742	28740	3517674	2.08094
LP6005615-DNA_H02	41.5293	562577	17986	3486650	2.07889
LP6005615-DNA_H04	42.8852	566788	17461	3480552	2.08038
LP6005616-DNA_C12	47.4831	560780	18889	3478434	2.08078
LP6005616-DNA_D01	47.3793	576114	18786	3484364	2.08106
LP6005616-DNA_G07	48.2803	565222	18265	3484318	2.07979
LP6005618-DNA_A04	44.5951	560043	20533	3479515	2.08009
LP6005618-DNA_A06	44.9829	566181	19279	3478633	2.08115
LP6005618-DNA_C02	50.6351	581979	18322	3486834	2.08048
LP6005618-DNA_C04	49.0405	576152	19050	3502835	2.08104
LP6005618-DNA_F06	46.1522	572124	18252	3489133	2.07898
LP6005618-DNA_G09	36.8887	549174	17696	3471418	2.07819
LP6005620-DNA_G03	39.9013	570027	17473	3486115	2.07832
LP6005621-DNA_B07	40.2571	563442	21352	3502099	2.081
LP6005621-DNA_E04	59.7315	560580	19005	3464785	2.08373
LP6005617-DNA_A12	46.5358	569568	18532	3483002	2.07995
LP6005617-DNA_H11	47.9676	577247	19023	3479267	2.08024
LP6005618-DNA_E02	47.1671	597541	47441	3574025	2.07961
LP6005618-DNA_H04	44.5567	571302	18549	3463171	2.08085
LP6005615-DNA_F08	51.0413	569967	19040	3484448	2.08018
LP6005615-DNA_H06	51.1638	576614	28377	3513308	2.0819
LP6005615-DNA_B07	34.2742	555033	18037	3488470	2.07832
LP6005615-DNA_C08	56.6041	570963	19707	3490353	2.07737
LP6005617-DNA_A08	43.3272	566802	17005	3483099	2.07855
LP6005617-DNA_H07	48.7251	572056	18705	3473611	2.07767
LP6005618-DNA_E09	40.9897	591640	38904	3660593	2.08122
LP6005620-DNA_A04	38.6582	554208	19230	3493491	2.08093
LP6005620-DNA_H03	36.7606	544957	17996	3469193	2.07797
LP6005621-DNA_F07	55.6799	548900	16018	3421729	2.0808
LP6005621-DNA_H09	52.4023	556207	18015	3494248	2.0816
LP6005621-DNA_H11	50.3903	551509	18413	3475614	2.07985
LP6005681-DNA_B10	37.8054	548529	18245	3489264	2.07767
LP6005681-DNA_B12	41.4092	560760	18350	3506006	2.08144
LP6005681-DNA_C12	37.5256	553597	18337	3486428	2.0807
LP6005681-DNA_D10	37.9056	557352	21128	3494725	2.07747
LP6005681-DNA_E09	35.3616	542846	17650	3496374	2.07846
LP6005681-DNA_E10	40.995	565826	17610	3489158	2.0801
LP6005681-DNA_F09	40.2432	546524	18054	3483344	2.07824
LP6005681-DNA_F10	39.0622	555835	19205	3476512	2.0785
LP6005681-DNA_G10	39.6387	575981	17148	3498406	2.08033
LP6005681-DNA_H10	40.0835	575607	18708	3481602	2.08293
LP6005682-DNA_A02	49.4269	550856	17418	3467474	2.07744
LP6005682-DNA_A03	48.2544	552758	18481	3469259	2.08187
LP6005682-DNA_B02	47.0263	568684	17630	3488040	2.07683
LP6005682-DNA_B03	47.3546	554371	17374	3435358	2.08135
LP6005682-DNA_C02	48.1405	568143	18199	3477811	2.08014
LP6005682-DNA_C03	43.7822	554347	23666	3492036	2.07904
LP6005682-DNA_D02	49.5336	572971	18853	3482771	2.07976
LP6005682-DNA_D03	43.7379	550870	18499	3463654	2.08055
LP6005682-DNA_E01	34.2543	536931	18944	3464169	2.07628
LP6005682-DNA_E02	48.0543	572316	18154	3502221	2.08098
LP6005682-DNA_E03	44.9233	547073	17614	3474160	2.07919
LP6005682-DNA_F01	38.7471	561442	17429	3484482	2.07894
LP6005682-DNA_F02	48.41	568822	17717	3476052	2.08038
LP6005682-DNA_F03	44.4838	550000	18837	3490690	2.07896
LP6005682-DNA_G01	39.1515	562700	17942	3483210	2.07679
LP6005682-DNA_G02	46.1446	558821	17387	3477218	2.07831
LP6005682-DNA_G03	45.029	547995	25505	3487773	2.0787
LP6005682-DNA_H01	38.1525	564606	19950	3488891	2.08116
LP6005682-DNA_H02	44.4267	555235	16949	3504151	2.07835
LP6005682-DNA_H03	43.1471	540757	17572	3486499	2.0798
LP6005682-DNA_H06	47.5383	555243	18525	3460070	2.07744
LP6005681-DNA_D09	38.6061	555123	21596	3494643	2.07839
LP6005681-DNA_G11	41.7514	560959	19385	3478870	2.0813
LP6005681-DNA_E08	39.79	563090	18498	3494026	2.07901
LP6005681-DNA_C09	44.591	571779	18584	3488649	2.0793
LP6005681-DNA_E11	37.7511	561074	17048	3487305	2.07834
LP6005681-DNA_H09	40.6492	559972	18940	3474737	2.07921
LP6005681-DNA_A09	38.6386	540117	17611	3466090	2.07939
LP6005681-DNA_C11	41.5996	567674	19013	3492239	2.08001
LP6005682-DNA_E08	40.6207	549411	19401	3488136	2.07732
LP6005682-DNA_C07	39.2476	563139	17786	3508939	2.07905
LP6005681-DNA_H11	39.2233	557195	23294	3489473	2.08238
LP6005682-DNA_E06	43.8967	560569	18486	3490423	2.08161
LP6005682-DNA_A06	46.8859	576805	43522	3624754	2.07737
LP6005682-DNA_B07	42.9369	563078	17481	3465352	2.08063
LP6005682-DNA_C08	42.1539	551225	16975	3486668	2.08044
LP6005681-DNA_F11	37.3732	561573	19829	3498532	2.08013
LP6005681-DNA_F08	38.067	556497	17430	3477159	2.07742
LP6005681-DNA_G09	39.1843	556379	18365	3476190	2.07886
LP6005681-DNA_D12	37.0235	560765	28301	3510776	2.07762
LP6005681-DNA_B09	39.3349	564278	17984	3492742	2.07767
LP6005681-DNA_B11	34.8794	552898	17154	3495310	2.07983
LP6005681-DNA_E12	34.1481	547904	17976	3506604	2.07825
LP6005681-DNA_A12	35.3166	544124	19048	3483170	2.08206
LP6005682-DNA_F08	40.149	551152	17477	3509259	2.08175
LP6005682-DNA_H05	39.2374	550492	20411	3478541	2.08098
LP6005615-DNA_B11	52.4473	573308	12040	3522706	2.07995
LP6005681-DNA_A05	39.2259	564796	18482	3473994	2.07913
LP6005681-DNA_A06	35.9363	557809	18495	3482122	2.07931
LP6005681-DNA_C05	32.9234	549178	17743	3478706	2.08047
LP6005681-DNA_C10	40.1232	559753	18722	3483877	2.08093
LP6005681-DNA_D05	33.5411	547813	17564	3469061	2.08044
LP6005681-DNA_E06	39.5046	568029	19623	3471614	2.07929
LP6005681-DNA_F06	32.5355	546441	17731	3485751	2.07974
LP6005681-DNA_G06	34.6705	549662	17945	3489121	2.07914
LP6005682-DNA_A08	39.7845	546404	21485	3453635	2.07832
LP6005682-DNA_B01	44.3227	573207	18029	3485216	2.0783
LP6005682-DNA_B08	52.2566	587597	40039	3555604	2.07868
LP6005682-DNA_C01	41.3632	559733	20034	3498915	2.07465
LP6005681-DNA_B08	41.0917	559845	19903	3493279	2.0813
LP6005681-DNA_C08	40.3464	565228	18845	3497048	2.08197
LP6005681-DNA_D08	41.4653	566145	17117	3477816	2.08075
LP6005681-DNA_D11	38.4898	565262	17610	3502825	2.08003
LP6005681-DNA_E05	35.1732	555388	18905	3496562	2.08084
LP6005681-DNA_E07	40.0672	562610	18104	3493115	2.0803
LP6005681-DNA_F05	36.2937	552420	17769	3480314	2.07875
LP6005681-DNA_G12	34.2036	539868	18496	3493274	2.08045
LP6005681-DNA_H07	42.7506	566208	20999	3477729	2.08078
LP6005682-DNA_C06	49.6132	565405	18587	3493895	2.0796
LP6005682-DNA_D06	46.567	560772	17159	3472874	2.07843
LP6005682-DNA_D07	42.8314	561556	17424	3464692	2.07996
LP6005682-DNA_E07	40.9558	557594	19418	3479553	2.07966
LP6005682-DNA_F06	48.0976	556674	18578	3478367	2.07616
LP6005682-DNA_F07	43.605	562893	18478	3490436	2.0808
LP6005682-DNA_G06	43.3945	556871	16965	3461674	2.07942
LP6005682-DNA_G07	38.4121	552539	18181	3474572	2.08092
LP6005682-DNA_G08	40.0144	549425	17959	3507440	2.08096
LP6005681-DNA_A01	33.1268	548736	17421	3468461	2.07954
LP6005681-DNA_A02	37.7617	563011	17865	3496596	2.07739
LP6005681-DNA_A03	34.048	547804	19202	3476213	2.07908
LP6005681-DNA_A04	35.9776	558544	17654	3486537	2.08009
LP6005681-DNA_A07	33.1662	559876	18058	3487881	2.08132
LP6005681-DNA_A10	34.9788	550337	20233	3481555	2.08166
LP6005681-DNA_A11	39.4882	560254	20260	3496328	2.07957
LP6005681-DNA_B01	36.923	564500	17948	3481432	2.08188
LP6005681-DNA_B03	37.0664	560844	16827	3478266	2.07819
LP6005681-DNA_B04	32.8984	565402	23041	3539772	2.07973
LP6005681-DNA_B06	35.8171	561631	17998	3504864	2.08024
LP6005681-DNA_B07	40.2841	578077	19182	3485945	2.0807
LP6005681-DNA_C01	36.1929	566774	19723	3499036	2.07997
LP6005681-DNA_C03	36.2826	559000	18605	3498049	2.08202
LP6005681-DNA_C04	33.4582	554559	17533	3494661	2.07934
LP6005681-DNA_C06	36.7867	575444	44196	3601691	2.0776
LP6005681-DNA_C07	37.0494	565087	17998	3500909	2.08329
LP6005681-DNA_D01	34.3254	559771	18325	3484197	2.07808
LP6005681-DNA_D03	35.9925	557841	17812	3486702	2.08152
LP6005681-DNA_D04	37.743	567823	18716	3491071	2.0799
LP6005681-DNA_D06	39.4407	569451	17274	3477812	2.07916
LP6005681-DNA_E01	40.3066	575027	18895	3489647	2.078
LP6005681-DNA_E02	38.8456	566670	31490	3486991	2.0804
LP6005681-DNA_E03	39.5781	564710	17759	3494705	2.08113
LP6005681-DNA_F01	40.0508	573916	16534	3486170	2.0809
LP6005681-DNA_F02	33.2928	549277	18122	3487308	2.08214
LP6005681-DNA_F03	33.3158	541605	17495	3480024	2.07838
LP6005681-DNA_F07	37.6821	571067	18764	3509315	2.07792
LP6005681-DNA_F12	45.077	567381	17843	3487693	2.07868
LP6005681-DNA_G01	36.5586	556205	22181	3489224	2.07773
LP6005681-DNA_G03	36.5959	557908	17510	3493327	2.0792
LP6005681-DNA_G05	40.479	569828	17874	3493607	2.08105
LP6005681-DNA_G07	35.6839	565269	17457	3483417	2.08078
LP6005681-DNA_H02	37.8597	560478	17669	3487222	2.07947
LP6005681-DNA_H04	33.137	551727	17828	3466003	2.07843
LP6005681-DNA_H05	35.9678	561623	18169	3483537	2.08027
LP6005681-DNA_H06	39.5901	571931	19979	3498905	2.07741
LP6005681-DNA_H08	43.2881	561880	19701	3492656	2.07885
LP6005682-DNA_H07	43.0769	572033	18338	3503653	2.07873
LP6005616-DNA_D12	48.6443	559950	17657	3487666	2.08033
LP6005616-DNA_E07	45.5265	562076	23861	3481876	2.08075
LP6005621-DNA_E02	44.9894	567095	18728	3489383	2.07685
LP6005621-DNA_G03	48.626	557426	18115	3477106	2.07944
LP6005621-DNA_G05	41.9618	534132	17759	3473321	2.08119
LP6005616-DNA_F07	41.5578	568650	54634	3545354	2.07738
LP6005618-DNA_A10	42.9254	567095	17190	3482084	2.07907
LP6005618-DNA_B10	42.3182	560212	17956	3467566	2.08181
LP6005618-DNA_H05	43.4171	572665	19595	3490839	2.08058
LP6005620-DNA_A03	49.9869	585620	17472	3499262	2.08042
LP6005620-DNA_A05	41.9077	561186	18889	3466540	2.08083
LP6005620-DNA_A06	40.4385	552556	19816	3489290	2.0797
LP6005620-DNA_A07	38.8972	546318	17925	3484458	2.08231
LP6005620-DNA_A08	36.5601	546741	17545	3487407	2.07894
LP6005620-DNA_A09	52.0406	586158	17578	3486708	2.078
LP6005620-DNA_A10	35.9959	549990	18352	3484871	2.07954
LP6005620-DNA_A11	55.2558	574425	17323	3471299	2.08139
LP6005620-DNA_B06	37.2516	549405	19288	3504487	2.08016
LP6005620-DNA_B07	41.4808	556347	17012	3502656	2.08229
LP6005620-DNA_B08	39.8444	546077	17578	3466498	2.07777
LP6005620-DNA_B09	43.3123	570191	17890	3491941	2.08019
LP6005620-DNA_C06	35.8046	530683	17874	3482193	2.07869
LP6005620-DNA_C09	39.9924	558914	18259	3483387	2.07726
LP6005620-DNA_D05	37.953	554828	18022	3459278	2.08177
LP6005620-DNA_D06	47.1106	577929	19043	3479894	2.07946
LP6005620-DNA_D08	40.2842	549029	18567	3488737	2.0813
LP6005620-DNA_D09	41.6949	556485	18956	3482901	2.07997
LP6005620-DNA_E06	39.3184	533362	18176	3503864	2.07592
LP6005620-DNA_E07	39.2278	550501	18273	3486302	2.07741
LP6005620-DNA_F06	40.7095	530908	18151	3474424	2.08012
LP6005620-DNA_F09	36.744	547397	17076	3497410	2.08127
LP6005620-DNA_G04	43.3032	558854	17764	3475698	2.07958
LP6005620-DNA_G05	41.3384	564419	18241	3497471	2.07935
LP6005620-DNA_G06	43.9245	560174	18279	3509004	2.08223
LP6005620-DNA_G07	41.7242	558104	19895	3514884	2.07798
LP6005620-DNA_G08	40.9033	554055	18838	3471722	2.07889
LP6005620-DNA_G09	35.6422	538197	18412	3475831	2.07982
LP6005620-DNA_H05	37.797	556651	18905	3492720	2.07878
LP6005620-DNA_H07	54.1562	586361	19022	3472026	2.08003
LP6005620-DNA_H08	48.0384	576304	18307	3500003	2.08145
LP6005620-DNA_H09	34.3205	535790	17711	3475963	2.08026
LP6005620-DNA_H10	43.1146	575046	20035	3506940	2.07786
LP6005621-DNA_E09	35.8263	532435	19027	3471473	2.07839
LP6005616-DNA_A06	45.041	566779	20106	3481888	2.08181
LP6005616-DNA_A08	48.55	555754	18403	3494957	2.0805
LP6005616-DNA_A10	51.3666	568887	17420	3476283	2.0791
LP6005616-DNA_A11	39.9121	563686	17824	3500699	2.07831
LP6005616-DNA_B05	44.0596	576224	19155	3482064	2.08115
LP6005616-DNA_B06	47.8522	568122	19306	3476009	2.0772
LP6005616-DNA_B07	48.8536	578289	12050	3480288	2.0791
LP6005616-DNA_B10	54.942	568477	19193	3451606	2.07974
LP6005616-DNA_C05	45.0648	581048	17331	3484333	2.07665
LP6005616-DNA_C09	51.5737	568853	17686	3470721	2.08156
LP6005616-DNA_C11	53.9238	578944	18239	3479688	2.07789
LP6005616-DNA_D05	44.1189	587823	18948	3499516	2.07904
LP6005616-DNA_D06	37.3612	555971	17619	3489326	2.07998
LP6005616-DNA_E12	50.4613	559353	17626	3482633	2.07973
LP6005616-DNA_F04	45.4912	565673	18292	3488940	2.08009
LP6005617-DNA_D02	53.9248	584956	17398	3470493	2.07926
LP6005618-DNA_B09	39.9436	568789	18365	3482939	2.08233
LP6005621-DNA_B03	50.2499	557486	18485	3486779	2.08031
LP6005621-DNA_C02	40.5476	541043	19757	3476615	2.07976
LP6005621-DNA_D02	40.6807	541764	19964	3485051	2.08199
LP6005621-DNA_F02	41.0705	570488	17512	3484475	2.07779
LP6005621-DNA_F09	48.4975	573686	18954	3490843	2.0792
LP6005621-DNA_H02	46.0381	575465	17734	3476583	2.08028
LP6005621-DNA_H05	41.7978	550177	17742	3487064	2.08151
LP6005616-DNA_F05	45.6345	568088	17867	3492836	2.07822
LP6005616-DNA_G09	52.4891	573414	18952	3490919	2.08088
LP6005616-DNA_G12	48.4255	565363	17124	3474333	2.0792
LP6005616-DNA_H05	46.7033	567344	20258	3482554	2.07479
LP6005616-DNA_H06	51.1712	578744	18938	3489316	2.08176
LP6005616-DNA_H07	49.1729	558013	18415	3495528	2.08157
LP6005616-DNA_H08	52.8627	591072	16866	3471256	2.08156
LP6005620-DNA_G01	44.1815	572511	17786	3475283	2.07915
LP6005620-DNA_H01	47.5481	575650	18217	3492089	2.08074
LP6005621-DNA_B08	42.7719	565005	18215	3485803	2.07964
LP6005621-DNA_G04	50.0694	570676	18297	3476125	2.07864
LP6005621-DNA_G08	48.836	579862	18113	3488777	2.07732
LP6005621-DNA_H07	42.5356	567653	19300	3482811	2.08031
LP6005621-DNA_H08	35.2139	544138	17907	3459499	2.08151
LP6005617-DNA_A01	45.996	571487	18194	3491541	2.07908
LP6005618-DNA_A09	43.4556	566354	17924	3496114	2.07735
LP6005618-DNA_C10	43.7574	569901	19003	3494089	2.08154
LP6005618-DNA_E12	38.4731	571187	17107	3478588	2.08357
LP6005618-DNA_F09	44.0257	570193	18526	3473519	2.0795
LP6005620-DNA_D01	42.5021	565589	19789	3487967	2.07902
LP6005620-DNA_E01	43.6656	565214	21817	3482309	2.07961
LP6005620-DNA_F01	39.343	571492	19389	3496995	2.07841
LP6005620-DNA_F02	43.6967	568572	24043	3509133	2.07883
LP6005620-DNA_F12	49.5654	573099	19858	3460955	2.07886
LP6005620-DNA_G12	47.7339	581066	22273	3493892	2.08091
LP6005621-DNA_A01	52.8894	576908	18852	3488542	2.07948
LP6005621-DNA_A02	44.105	551414	16981	3470180	2.07866
LP6005621-DNA_A08	40.8088	561649	18073	3483598	2.08057
LP6005621-DNA_B06	49.0657	573317	18644	3488051	2.07983
LP6005621-DNA_C08	49.4787	580291	20822	3506676	2.07996
LP6005621-DNA_G01	50.7339	562462	20034	3484860	2.07705
LP6005621-DNA_H01	46.5299	559771	19068	3482149	2.08002
LP6005615-DNA_G10	44.3315	562611	12072	3485979	2.07649
LP6005616-DNA_B11	52.615	573977	18276	3462297	2.07885
LP6005620-DNA_A12	42.7737	573392	18281	3486399	2.08072
LP6005620-DNA_B11	44.297	555490	18487	3441736	2.07919
LP6005620-DNA_B12	45.4404	581527	18314	3489329	2.07997
LP6005620-DNA_D11	33.629	522777	18447	3471532	2.07924
LP6005620-DNA_E03	50.9213	589773	18423	3502544	2.08085
LP6005620-DNA_E08	36.9674	537248	17984	3472225	2.08099
LP6005620-DNA_F03	53.4539	584197	17355	3476070	2.08109
LP6005620-DNA_F04	45.2232	572383	18397	3476496	2.07901
LP6005620-DNA_F08	36.6575	539026	18486	3497986	2.08027
LP6005620-DNA_H11	42.1691	547887	18066	3491749	2.08069
LP6005615-DNA_E05	44.264	573786	17487	3501598	2.07745
LP6005615-DNA_H11	47.5387	575162	12037	3474008	2.08238
LP6005616-DNA_A12	50.4124	569982	17989	3462703	2.08117
LP6005616-DNA_B08	49.4224	580842	18298	3485274	2.07861
LP6005616-DNA_B12	54.6574	566308	18147	3457346	2.0802
LP6005616-DNA_C06	39.8936	566928	18789	3493802	2.08038
LP6005616-DNA_C07	49.5966	576662	19153	3479165	2.08044
LP6005616-DNA_C08	48.1551	578552	19318	3489470	2.07994
LP6005616-DNA_D08	50.1193	580781	17487	3486707	2.07826
LP6005616-DNA_D09	48.7321	560495	17240	3468552	2.07849
LP6005616-DNA_E09	49.5918	566393	18728	3485722	2.07981
LP6005616-DNA_F08	48.6411	576827	19874	3481374	2.08061
LP6005616-DNA_F09	52.09	571020	19079	3492993	2.07696
LP6005616-DNA_G04	43.8334	562497	19531	3486223	2.08274
LP6005616-DNA_G05	47.7832	569158	12014	3481457	2.07815
LP6005616-DNA_G08	51.1248	582404	18297	3461920	2.07996
LP6005616-DNA_H09	51.8982	571714	18766	3487756	2.08144
LP6005618-DNA_D10	42.8398	562285	18838	3482375	2.07833
LP6005618-DNA_F12	39.7982	574831	17302	3498196	2.07924
LP6005618-DNA_G08	44.9357	568007	18320	3475485	2.08035
LP6005618-DNA_G12	43.6428	573068	19552	3477560	2.07876
LP6005620-DNA_B01	39.0288	561352	16830	3481838	2.07728
LP6005620-DNA_B02	49.7674	570383	18134	3488467	2.0788
LP6005620-DNA_C02	50.3939	573870	18074	3503456	2.07707
LP6005620-DNA_C12	52.858	579781	18324	3490001	2.08181
LP6005620-DNA_D12	46.0415	569538	17436	3460043	2.0784
LP6005620-DNA_E12	49.6195	576312	18457	3488615	2.07923
LP6005681-DNA_A08	35.4739	559259	19178	3494522	2.08064
LP6005681-DNA_B02	38.0862	566638	16986	3489250	2.07829
LP6005681-DNA_B05	38.5335	572671	18533	3505887	2.08071
LP6005681-DNA_C02	37.3001	563858	18542	3499486	2.07878
LP6005681-DNA_D02	33.5901	545220	18234	3468802	2.08071
LP6005681-DNA_E04	32.7633	553586	17249	3484378	2.0796
LP6005681-DNA_F04	33.8779	564036	17979	3492169	2.0786
LP6005681-DNA_G02	39.7151	569350	19034	3507154	2.08237
LP6005681-DNA_G04	33.6993	552157	19089	3499744	2.07837
LP6005681-DNA_G08	37.8691	558437	17085	3479455	2.07711
LP6005681-DNA_H03	38.7891	563588	17965	3491469	2.07796
LP6005682-DNA_A01	43.3475	575356	17018	3482192	2.07719
LP6005869-DNA_E03	45.3168	549107	17603	3461072	2.07825
LP6005874-DNA_C10	47.4513	551326	18672	3400587	2.07932
LP6005874-DNA_D07	48.4541	561055	17103	3480828	2.0782
LP6005874-DNA_B02	49.4608	573792	18805	3505932	2.07923
LP6005874-DNA_D02	46.4242	568828	18517	3489734	2.07928
LP6005874-DNA_C07	47.4668	562233	17874	3476638	2.07896
LP6005874-DNA_F01	43.0247	545996	21191	3477231	2.07644
LP6005874-DNA_E02	46.4369	570273	17880	3487067	2.07627
LP6005871-DNA_C11	48.9835	581671	47960	3570480	2.07587
LP6005874-DNA_H01	48.3621	571199	18058	3487080	2.08033
LP6005874-DNA_C02	47.7953	568142	18799	3485208	2.07859
LP6005871-DNA_G08	48.0481	564494	17164	3488216	2.07845
LP6005869-DNA_G01	42.263	560631	23745	3500423	2.07924
LP6005871-DNA_B11	47.3364	568340	19045	3472293	2.0788
LP6005871-DNA_H10	47.696	565338	18270	3508753	2.07844
LP6005871-DNA_A08	43.0446	540588	19165	3464119	2.07718
LP6005874-DNA_B10	47.2077	561691	19051	3459085	2.07783
LP6005871-DNA_D08	49.4058	561249	17707	3482696	2.07851
LP6005874-DNA_E01	41.4739	545620	18286	3489406	2.07705
LP6005874-DNA_D10	46.9673	565121	20375	3501670	2.08137
LP6005874-DNA_E10	44.5669	556396	18069	3479642	2.0786
LP6005874-DNA_A10	42.3016	554592	18010	3498549	2.07439
LP6005871-DNA_F08	46.0833	565097	18958	3501156	2.07785
LP6005874-DNA_A02	49.3457	569288	20194	3469213	2.07942
LP6005874-DNA_H09	43.8898	551127	20463	3506929	2.07835
LP6005874-DNA_F02	44.387	565114	17314	3463059	2.07866
LP6005869-DNA_H01	46.8154	565612	17876	3478476	2.07845
LP6005869-DNA_C03	44.8388	545695	17975	3478713	2.07816
LP6005869-DNA_B01	43.6708	557006	18451	3484035	2.08106
LP6005869-DNA_F01	39.3512	554883	17565	3467011	2.07892
LP6005869-DNA_B03	45.2092	547182	19622	3477753	2.08053
LP6005869-DNA_C01	50.8386	562680	18503	3476522	2.08023
LP6005871-DNA_A11	49.4516	568894	19373	3475529	2.07746
LP6005869-DNA_D01	47.2965	556798	17936	3471123	2.08038
LP6005874-DNA_A03	47.707	566023	18186	3491247	2.07801
LP6005874-DNA_G08	44.4879	549901	18176	3470791	2.07867
LP6005874-DNA_E06	44.2257	563520	19189	3494894	2.07903
LP6005874-DNA_D04	39.7429	555451	18248	3485875	2.07815
LP6005874-DNA_B07	46.4057	563892	20664	3482834	2.07685
LP6005874-DNA_D05	41.225	550456	17763	3478545	2.07904
LP6005874-DNA_A06	46.0343	559949	19158	3477377	2.07933
LP6005874-DNA_E05	38.7707	549347	24444	3499854	2.08115
LP6005874-DNA_H02	47.2242	564938	19558	3471204	2.07781
LP6005874-DNA_C01	44.2775	557918	16646	3457090	2.08055
LP6005874-DNA_G05	44.1868	553159	20756	3488179	2.07967
LP6005874-DNA_H05	43.13	555657	18966	3493529	2.07771
LP6005874-DNA_H06	45.3886	566097	19145	3483901	2.08028
LP6005874-DNA_B06	44.7463	559669	16953	3493785	2.08179
LP6005874-DNA_D01	41.7565	561417	18916	3485582	2.0785
LP6005874-DNA_C05	44.6372	556324	17006	3479645	2.0787
LP6005874-DNA_B04	44.6869	560812	21331	3511489	2.0805
LP6005874-DNA_C04	43.957	559335	17775	3477838	2.08014
LP6005874-DNA_A07	48.1516	569458	17458	3490271	2.07624
LP6005874-DNA_F06	43.3899	568851	18917	3492227	2.08013
LP6005874-DNA_B01	44.1777	567393	18684	3496855	2.08203
LP6005874-DNA_D06	49.3133	568114	19385	3488165	2.07918
LP6005874-DNA_H08	42.4065	551164	17972	3477305	2.07695
LP6005874-DNA_E09	48.344	572765	18660	3509683	2.07887
LP6005874-DNA_E04	36.3796	549103	19978	3491993	2.08185
LP6005874-DNA_F05	41.872	548553	17403	3468429	2.07828
LP6005874-DNA_G06	46.0287	572786	18458	3499572	2.07888
LP6005874-DNA_B09	47.1657	572651	17527	3483098	2.07876
LP6005872-DNA_E02	50.0089	565305	19087	3490139	2.07762
LP6005871-DNA_D11	48.681	576157	19272	3490788	2.0767
LP6005872-DNA_H11	35.0245	550661	17046	3498620	2.08066
LP6005871-DNA_H11	45.3772	571092	18571	3492701	2.07865
LP6005874-DNA_F07	43.8102	555084	19884	3480674	2.07822
LP6005872-DNA_C04	47.4599	564710	17930	3492260	2.07726
LP6005874-DNA_H11	42.5874	555370	23567	3503805	2.08102
LP6005874-DNA_D12	40.271	547570	17205	3470235	2.08031
LP6005874-DNA_D09	47.6184	572548	19205	3491099	2.0798
LP6005871-DNA_E11	46.7835	578972	35044	3543151	2.07658
LP6005874-DNA_G11	41.2586	553965	19145	3490163	2.0772
LP6005874-DNA_E08	42.6025	559747	18110	3488473	2.07708
LP6005871-DNA_D07	51.4848	581433	19035	3482496	2.07995
LP6005872-DNA_E03	53.6604	586436	17487	3497139	2.07985
LP6005874-DNA_C12	42.562	561006	21630	3490551	2.08072
LP6005872-DNA_B04	52.3902	589398	18111	3487046	2.08014
LP6005874-DNA_D08	43.9745	558182	18383	3485358	2.07888
LP6005872-DNA_B03	45.8358	553304	19046	3490584	2.08024
LP6005872-DNA_D11	48.6146	560436	17990	3491382	2.07955
LP6005872-DNA_F02	49.5287	569393	17386	3456959	2.08031
LP6005871-DNA_F10	49.7299	580697	17292	3500815	2.07904
LP6005872-DNA_H02	48.6753	566533	17499	3475340	2.07791
LP6005874-DNA_A12	43.0338	559841	18347	3493572	2.07965
LP6005871-DNA_G11	46.3515	574438	21318	3512986	2.08294
LP6005872-DNA_D03	50.1703	578742	16744	3476988	2.08184
LP6005871-DNA_F11	41.8314	570015	19349	3503038	2.07818
LP6005872-DNA_E11	46.3478	559787	18712	3485667	2.0799
LP6005872-DNA_A04	52.0251	590923	25956	3521995	2.08134
LP6005871-DNA_E07	49.2046	575256	18850	3478304	2.08068
LP6005872-DNA_D02	50.7609	565910	18080	3477613	2.07872
LP6005874-DNA_H12	43.4214	566240	18690	3512173	2.08011
LP6005872-DNA_D04	44.747	547393	18992	3485920	2.08029
LP6005871-DNA_H07	47.2724	557143	17884	3480688	2.07777
LP6005872-DNA_E01	46.9718	563619	18350	3504778	2.08244
LP6005871-DNA_C09	46.9845	569155	18043	3514636	2.07751
LP6005872-DNA_A02	51.201	565907	18537	3479130	2.07942
LP6005871-DNA_G07	47.1747	570782	18253	3489514	2.07989
LP6005872-DNA_B01	47.9715	565006	17338	3468975	2.07639
LP6005871-DNA_H08	49.689	565454	19521	3478658	2.08075
LP6005871-DNA_G10	48.8755	566180	18293	3490879	2.08017
LP6005871-DNA_C10	51.3368	573730	18243	3502458	2.08045
LP6005871-DNA_B08	45.2229	551423	18109	3505038	2.078
LP6005872-DNA_F09	45.1118	559962	19145	3485408	2.07842
LP6005872-DNA_D01	47.5397	568570	18115	3479217	2.08026
LP6005874-DNA_H07	40.2567	548176	18604	3482062	2.07649
LP6005872-DNA_H01	47.0459	549413	19306	3491348	2.07942
LP6005872-DNA_C01	51.5306	567950	16650	3457231	2.07964
LP6005871-DNA_F07	48.0114	567702	17756	3482678	2.0788
LP6005871-DNA_E10	49.4398	566986	17415	3480255	2.0802
LP6005874-DNA_C09	46.6859	568811	17789	3467915	2.07965
LP6005872-DNA_F11	53.7912	590245	20855	3501276	2.0806
LP6005872-DNA_G02	47.0753	568931	17274	3482311	2.08132
LP6005871-DNA_B09	49.7498	567218	21175	3488183	2.07662
LP6005874-DNA_A08	42.5869	537931	17779	3464887	2.08189
LP6005872-DNA_G11	51.9661	579597	16981	3473732	2.07974
LP6005872-DNA_G09	47.1529	562263	19507	3493960	2.07868
LP6005872-DNA_A01	46.624	568156	17761	3496211	2.07812
LP6005872-DNA_E04	43.9038	540405	14719	3468530	2.07779
LP6005871-DNA_G05	46.9036	559117	19162	3479831	2.08064
LP6005873-DNA_D01	47.5643	550731	17771	3487235	2.08069
LP6005869-DNA_A03	43.5092	558772	20835	3480468	2.08321
LP6005869-DNA_A07	45.055	560959	17970	3481458	2.07781
LP6005869-DNA_B07	48.1366	559869	18353	3473277	2.08006
LP6005869-DNA_C07	41.2504	550750	21977	3494487	2.07867
LP6005869-DNA_D03	48.8628	561005	17615	3463514	2.07937
LP6005869-DNA_E12	44.2177	565901	21846	3492401	2.07933
LP6005869-DNA_F03	45.6019	556306	19308	3477019	2.07889
LP6005869-DNA_F12	44.5523	565553	17916	3493655	2.07911
LP6005869-DNA_G03	43.5249	554238	18021	3494879	2.07796
LP6005869-DNA_G12	43.8391	561354	19675	3477843	2.07772
LP6005869-DNA_H12	44.5935	557462	19360	3482325	2.07915
LP6005871-DNA_A01	46.5555	563238	17436	3493904	2.08004
LP6005871-DNA_A04	53.3195	571066	17302	3474036	2.07851
LP6005871-DNA_A05	46.9711	552738	21492	3471273	2.08165
LP6005871-DNA_B01	50.3497	566536	17130	3479836	2.07772
LP6005871-DNA_B04	50.5218	572157	18872	3500213	2.0809
LP6005871-DNA_B05	48.8799	554841	18684	3475602	2.07942
LP6005871-DNA_C04	46.7324	567819	17593	3490856	2.07802
LP6005871-DNA_C05	47.4543	557351	17976	3485277	2.07843
LP6005871-DNA_C07	49.168	571683	16914	3478615	2.07767
LP6005871-DNA_D04	46.9239	566542	18307	3487314	2.07782
LP6005871-DNA_D05	47.2118	557060	18213	3488037	2.07795
LP6005871-DNA_E04	47.1571	563871	18762	3491804	2.07926
LP6005871-DNA_E05	46.8258	559920	19987	3493143	2.08098
LP6005871-DNA_F03	48.4274	580138	18076	3495422	2.07737
LP6005871-DNA_F05	46.8957	557051	18066	3456667	2.07991
LP6005871-DNA_G03	47.7465	582037	17443	3514198	2.07755
LP6005871-DNA_H03	47.9839	571797	17941	3477078	2.07659
LP6005873-DNA_C02	56.1733	571731	19496	3489646	2.08141
LP6005873-DNA_E01	44.2415	550060	19073	3470686	2.07965
LP6005873-DNA_E03	34.3621	530248	18043	3477021	2.07574
LP6005873-DNA_F01	42.9255	555287	18406	3488324	2.07833
LP6005869-DNA_A01	46.9367	560221	18202	3484934	2.07459
LP6005869-DNA_A02	46.6809	558938	17832	3492133	2.07651
LP6005869-DNA_A06	38.9999	535963	18815	3465506	2.079
LP6005869-DNA_A12	40.2162	562847	18221	3489227	2.08089
LP6005869-DNA_B02	49.3985	560174	17887	3481807	2.08125
LP6005869-DNA_B05	44.3835	544602	18214	3485001	2.0754
LP6005869-DNA_B06	43.6023	551833	19094	3486453	2.07847
LP6005869-DNA_B12	44.0335	566768	17576	3487733	2.0796
LP6005869-DNA_C02	47.9513	561248	16488	3453586	2.07678
LP6005869-DNA_C06	43.1838	548383	17855	3477843	2.08053
LP6005869-DNA_C12	43.1384	559879	19109	3493854	2.08132
LP6005869-DNA_D02	48.4836	567621	17044	3488417	2.08017
LP6005869-DNA_D05	42.8797	549917	18497	3478093	2.07628
LP6005869-DNA_D06	47.4154	562271	18736	3486296	2.0806
LP6005869-DNA_D07	39.5037	537380	18598	3489428	2.08041
LP6005869-DNA_D12	37.8862	550203	19315	3498762	2.08067
LP6005869-DNA_E01	49.4897	561942	17886	3498601	2.07682
LP6005869-DNA_E02	46.7382	565132	19310	3495252	2.08112
LP6005869-DNA_E05	44.0358	550847	17208	3488944	2.07866
LP6005869-DNA_E06	46.3618	561106	17958	3476036	2.08196
LP6005869-DNA_E07	42.1532	538562	16767	3479363	2.08058
LP6005869-DNA_F02	41.7555	561113	19298	3489783	2.07909
LP6005869-DNA_F05	40.4754	539628	17715	3474275	2.07993
LP6005869-DNA_F06	46.1275	565414	18949	3495241	2.07868
LP6005869-DNA_F07	42.0362	542148	20081	3472534	2.07906
LP6005869-DNA_G06	47.7951	566634	18818	3480019	2.08068
LP6005869-DNA_G07	48.3117	556709	16805	3475674	2.07947
LP6005869-DNA_H02	41.4908	561249	19710	3495515	2.07853
LP6005869-DNA_H03	41.3964	554758	18830	3467979	2.08144
LP6005869-DNA_H06	46.107	565082	18542	3485415	2.08067
LP6005869-DNA_H07	48.9192	554196	15870	3443872	2.08027
LP6005869-DNA_H11	39.6781	560365	17277	3492982	2.07707
LP6005871-DNA_C08	49.3643	562292	17514	3473917	2.07752
LP6005871-DNA_E08	33.9711	527101	18881	3477100	2.07776
LP6005872-DNA_A09	46.9303	569544	17853	3478070	2.08047
LP6005872-DNA_D12	35.1661	531861	18429	3473050	2.08243
LP6005873-DNA_A06	46.6736	559179	17883	3495065	2.08024
LP6005873-DNA_A07	48.5341	553996	18585	3469919	2.08147
LP6005873-DNA_A08	49.6931	551282	18213	3461851	2.07877
LP6005873-DNA_A09	43.9832	555174	21291	3477612	2.0749
LP6005873-DNA_B03	41.5993	535735	19959	3490181	2.07991
LP6005873-DNA_B06	52.6966	581781	17558	3489635	2.07904
LP6005873-DNA_B08	54.56	555174	20301	3489124	2.08081
LP6005873-DNA_B10	33.8185	535373	16713	3484080	2.08003
LP6005873-DNA_C08	54.0146	562715	18958	3478832	2.0781
LP6005873-DNA_C09	50.7116	563004	18060	3486345	2.0779
LP6005873-DNA_C10	51.2817	569146	19201	3486258	2.07793
LP6005873-DNA_C11	38.6528	543301	18743	3485510	2.07737
LP6005873-DNA_D07	53.9168	555100	20836	3475720	2.08037
LP6005873-DNA_D09	50.2118	559845	18436	3507793	2.07846
LP6005873-DNA_D10	51.9464	567482	19393	3486118	2.07941
LP6005873-DNA_E02	46.7399	545087	17281	3484839	2.07901
LP6005873-DNA_E07	43.9357	556831	17628	3475021	2.07946
LP6005873-DNA_E09	52.7164	556016	19384	3493272	2.07954
LP6005873-DNA_F02	46.3193	544856	18826	3482795	2.07879
LP6005873-DNA_F04	54.1966	565905	17767	3495110	2.07866
LP6005873-DNA_F07	38.62	547942	27470	3530505	2.08029
LP6005873-DNA_F08	52.8827	569133	22286	3489115	2.0775
LP6005873-DNA_F10	49.3833	556861	18141	3491650	2.07976
LP6005873-DNA_G02	50.3486	546653	19262	3471089	2.0765
LP6005873-DNA_G03	48.3527	565325	18207	3488824	2.07963
LP6005873-DNA_G07	52.9131	554397	17431	3480084	2.07846
LP6005873-DNA_G10	45.7865	547913	18771	3461557	2.07893
LP6005873-DNA_H03	52.9699	571703	20149	3494173	2.07926
LP6005873-DNA_H07	51.0844	557678	20434	3505669	2.08017
LP6005873-DNA_H08	46.5716	563662	21630	3493610	2.08107
LP6005873-DNA_H09	44.3012	550177	17221	3491220	2.081
LP6005871-DNA_D10	50.3573	567097	17829	3476598	2.08012
LP6005871-DNA_E09	33.4644	533663	20250	3497554	2.07719
LP6005871-DNA_F09	44.1921	583632	36780	3654108	2.07918
LP6005871-DNA_G09	44.6215	562453	18671	3481760	2.07718
LP6005872-DNA_B09	52.9268	572600	17942	3498246	2.07956
LP6005872-DNA_E12	51.5787	563963	17407	3486216	2.07863
LP6005872-DNA_F12	51.4738	563910	17518	3485632	2.07905
LP6005872-DNA_G12	49.357	568231	16925	3472727	2.08085
LP6005872-DNA_H12	53.2781	575326	17879	3470648	2.07846
LP6005873-DNA_A03	49.7914	557084	17807	3471110	2.08137
LP6005873-DNA_A05	42.5138	564432	18587	3493694	2.07919
LP6005873-DNA_B01	44.4505	541551	18173	3490673	2.07868
LP6005873-DNA_B02	35.1166	538079	20055	3490983	2.08001
LP6005873-DNA_B04	56.1475	574737	20628	3477666	2.08049
LP6005873-DNA_B05	44.2887	543050	17624	3465723	2.07673
LP6005873-DNA_C01	45.4963	548420	17748	3473643	2.08238
LP6005873-DNA_C04	55.9357	576348	19327	3484759	2.07936
LP6005873-DNA_C05	40.7403	539378	17051	3477741	2.07825
LP6005873-DNA_D02	52.3316	570840	18695	3495454	2.07938
LP6005873-DNA_D04	55.8151	568415	17454	3476070	2.07958
LP6005873-DNA_E04	57.7159	562439	17192	3490708	2.07969
LP6005873-DNA_F05	55.0524	583305	19093	3472342	2.08103
LP6005873-DNA_G04	52.9922	582181	18149	3505776	2.08093
LP6005873-DNA_H02	47.9408	556621	17705	3482805	2.07714
LP6005873-DNA_H04	53.1905	596139	31930	3597711	2.07757
LP6005874-DNA_B12	40.9921	562627	38270	3519361	2.0776
LP6005874-DNA_E07	38.3763	552696	17296	3466650	2.07879
LP6005874-DNA_F09	40.3611	558852	18775	3487960	2.07861
LP6005874-DNA_G12	34.2307	521635	18985	3481851	2.07998
LP6005874-DNA_H04	40.5548	553008	17518	3486483	2.07937
LP6005869-DNA_A05	46.9836	553468	17815	3487214	2.07664
LP6005869-DNA_C05	44.6388	548658	17729	3480893	2.07942
LP6005869-DNA_C10	44.5445	561368	19755	3488918	2.08178
LP6005869-DNA_G05	46.7361	552685	17395	3486534	2.08057
LP6005869-DNA_H05	40.7951	546585	20616	3474662	2.078
LP6005869-DNA_H09	44.5827	571560	16903	3500652	2.07828
LP6005871-DNA_G04	38.0827	538127	19813	3469755	2.08207
LP6005871-DNA_H04	48.8312	558945	29063	3524091	2.08043
LP6005873-DNA_A01	50.2921	562034	17422	3482398	2.07746
LP6005873-DNA_A11	62.4089	574437	19566	3480181	2.07893
LP6005873-DNA_B11	48.0062	559147	18783	3484981	2.07833
LP6005873-DNA_C03	52.151	567241	17370	3488021	2.07792
LP6005873-DNA_E05	49.7956	573796	17430	3478150	2.08025
LP6005873-DNA_E06	51.2028	578512	18804	3482642	2.08127
LP6005873-DNA_F06	54.7913	574675	18402	3488591	2.08189
LP6005873-DNA_F09	49.2631	566130	23472	3526084	2.07661
LP6005873-DNA_G01	46.2776	562732	17392	3475982	2.07665
LP6005873-DNA_G09	47.2652	558322	16536	3486022	2.07859
LP6005873-DNA_H01	45.3117	570219	38009	3512180	2.08075
LP6005873-DNA_H10	49.6923	560902	17809	3482549	2.07874
LP6005873-DNA_H11	44.0652	550835	17004	3484075	2.08087
LP6005874-DNA_A01	41.744	559740	19968	3506459	2.07994
LP6005874-DNA_A04	47.8708	569534	18252	3489280	2.07878
LP6005874-DNA_A05	46.0179	564002	17569	3493915	2.0775
LP6005874-DNA_B03	45.8456	564920	18410	3499716	2.07847
LP6005874-DNA_B11	41.3594	556927	18892	3496185	2.08246
LP6005874-DNA_C08	47.7166	555365	19166	3485651	2.0798
LP6005874-DNA_D03	41.5906	559323	18098	3487436	2.07789
LP6005874-DNA_E03	38.8213	559653	16965	3476178	2.07646
LP6005874-DNA_F03	42.5488	562642	18664	3491330	2.08055
LP6005874-DNA_G01	42.2869	559229	17642	3482651	2.08127
LP6005874-DNA_G04	38.3616	554731	18729	3491113	2.07993
LP6005874-DNA_G09	44.4903	557379	17014	3482777	2.07999
LP6005871-DNA_B07	44.8499	548017	19113	3489504	2.07695
LP6005871-DNA_C12	49.7901	567531	18105	3495430	2.07764
LP6005872-DNA_A06	51.8178	571576	35619	3472611	2.07817
LP6005872-DNA_A08	53.0866	572892	17669	3467841	2.07918
LP6005872-DNA_A10	54.0605	567804	18526	3454765	2.07979
LP6005872-DNA_B06	54.6207	578107	17372	3477058	2.08337
LP6005872-DNA_B07	52.2975	565777	19293	3472896	2.08039
LP6005872-DNA_B08	55.2812	576102	21112	3481096	2.07751
LP6005872-DNA_B10	52.4321	565476	19620	3454249	2.07785
LP6005872-DNA_C07	51.3918	559137	18075	3455679	2.07764
LP6005872-DNA_C08	49.3525	575331	18910	3493484	2.08046
LP6005872-DNA_C09	49.0135	570164	25191	3533770	2.08028
LP6005872-DNA_C10	48.1258	561706	17587	3494982	2.07857
LP6005872-DNA_D08	48.2898	572587	18716	3479397	2.07815
LP6005872-DNA_E08	45.6502	568079	17121	3481728	2.07977
LP6005872-DNA_F05	48.9071	571967	24014	3503253	2.08337
LP6005872-DNA_F07	50.6691	570592	17183	3479803	2.07957
LP6005872-DNA_F08	45.5825	551054	19651	3489486	2.07859
LP6005872-DNA_F10	49.4324	569898	18052	3484376	2.08309
LP6005872-DNA_G04	50.4029	566466	17968	3490770	2.07568
LP6005872-DNA_G08	38.7977	542856	18420	3491864	2.08123
LP6005872-DNA_G10	46.4	566389	18346	3490723	2.08175
LP6005872-DNA_H03	49.2138	565927	21189	3461515	2.07964
LP6005872-DNA_H05	48.0011	565457	19395	3475065	2.08022
LP6005872-DNA_H07	51.2007	572319	19600	3453418	2.08024
LP6005872-DNA_H08	48.9224	566430	20622	3496459	2.07875
LP6005872-DNA_H09	49.7577	564735	17829	3460547	2.07569
LP6005874-DNA_A09	42.7452	560681	16956	3486933	2.07837
LP6005871-DNA_B12	45.775	565177	19406	3487010	2.07854
LP6005871-DNA_D12	50.2265	563445	20706	3475544	2.07692
LP6005871-DNA_E12	50.0408	573329	24730	3473580	2.07966
LP6005871-DNA_G12	50.5209	572305	22332	3480809	2.08021
LP6005871-DNA_H12	51.8945	572947	18707	3481880	2.07797
LP6005872-DNA_A05	49.6685	561865	16892	3479678	2.08005
LP6005872-DNA_A07	48.836	566775	18185	3476521	2.07852
LP6005872-DNA_B02	53.0518	565209	17719	3473217	2.08196
LP6005872-DNA_B05	44.5746	556411	18977	3483835	2.07954
LP6005872-DNA_C02	47.8935	564574	18020	3462516	2.08001
LP6005872-DNA_C05	50.6839	566825	20998	3488326	2.07778
LP6005872-DNA_D05	45.8729	556146	17776	3490522	2.07873
LP6005872-DNA_D07	51.0991	558253	19268	3476566	2.07874
LP6005872-DNA_E05	48.6778	556892	18556	3478911	2.07803
LP6005872-DNA_E07	48.264	562817	20672	3495506	2.0817
LP6005872-DNA_E09	51.4618	562138	19784	3490593	2.07847
LP6005872-DNA_F03	50.7875	569716	18056	3482522	2.07982
LP6005872-DNA_F04	53.962	569219	18183	3504744	2.07646
LP6005872-DNA_G03	49.0993	564527	18739	3497391	2.07854
LP6005872-DNA_G05	49.8418	570703	18089	3495959	2.08052
LP6005872-DNA_G07	51.1936	572005	17951	3481216	2.07941
LP6005872-DNA_H04	34.4839	536806	21899	3531195	2.0791
LP6005874-DNA_E11	41.0708	537497	17571	3496471	2.08011
LP6005874-DNA_G10	46.5007	576922	18721	3473719	2.07883
LP6005874-DNA_H03	42.2117	561445	17980	3493372	2.08049
LP6005874-DNA_H10	46.4825	573969	18535	3487764	2.08034
LP6005869-DNA_A04	49.7336	575622	19024	3480975	2.08218
LP6005869-DNA_A09	40.1852	555691	17514	3481399	2.08108
LP6005869-DNA_A10	42.9513	561199	17937	3487435	2.07983
LP6005869-DNA_A11	44.5696	564679	18132	3484139	2.08019
LP6005869-DNA_B04	50.7566	579016	19631	3481082	2.08095
LP6005869-DNA_B09	41.4011	563823	12131	3518848	2.07958
LP6005869-DNA_B10	44.8207	550793	17195	3422286	2.08206
LP6005869-DNA_B11	45.8328	568949	17320	3490682	2.08037
LP6005869-DNA_C04	48.3882	577795	17888	3485031	2.07837
LP6005869-DNA_C09	40.6401	561349	20366	3495434	2.08063
LP6005869-DNA_C11	50.151	571590	19716	3484703	2.08126
LP6005869-DNA_D09	49.872	575991	19639	3495615	2.08108
LP6005869-DNA_D11	49.2133	582613	19012	3492344	2.08107
LP6005869-DNA_E09	45.19	567774	17509	3486857	2.08008
LP6005869-DNA_F09	42.196	566170	12207	3501484	2.07978
LP6005869-DNA_F11	45.9915	578236	18323	3472390	2.08105
LP6005869-DNA_G08	44.9151	560663	17788	3478351	2.0814
LP6005869-DNA_G09	43.5332	577745	54803	3587695	2.07455
LP6005869-DNA_G11	42.1382	572462	17974	3477751	2.07859
LP6005869-DNA_H08	43.6252	559385	18407	3482541	2.07899
LP6005869-DNA_H10	41.8042	557151	19043	3483140	2.08075
LP6005871-DNA_A02	42.7905	538247	19151	3482356	2.0805
LP6005871-DNA_A06	47.8033	570513	17851	3496785	2.07936
LP6005871-DNA_A07	46.1493	544437	19188	3476198	2.08089
LP6005871-DNA_B02	42.3131	539379	17239	3480171	2.07887
LP6005871-DNA_B06	45.2225	569113	17900	3464310	2.07864
LP6005871-DNA_C01	51.8564	574393	18636	3478679	2.07966
LP6005871-DNA_C06	43.979	544260	21070	3485908	2.0779
LP6005871-DNA_D01	47.2773	570424	17606	3475043	2.08262
LP6005871-DNA_D06	40.0253	534794	18255	3465977	2.08135
LP6005871-DNA_E06	45.7455	546129	17423	3467673	2.07611
LP6005871-DNA_F06	43.4548	542859	19526	3481147	2.08078
LP6005871-DNA_H05	46.759	562517	17898	3473818	2.07815
LP6005871-DNA_H06	45.6122	547566	18083	3470410	2.07985
LP6005869-DNA_D04	45.4274	566109	18514	3485604	2.07946
LP6005869-DNA_D08	38.6306	542000	18336	3481282	2.0808
LP6005869-DNA_E08	42.7865	546307	17902	3495811	2.08262
LP6005869-DNA_E10	44.0233	567111	18926	3504507	2.08495
LP6005869-DNA_F08	43.2354	549405	19083	3485031	2.08149
LP6005869-DNA_F10	44.9137	567297	18318	3491510	2.08036
LP6005869-DNA_G10	42.6598	557835	19512	3485270	2.08144
LP6005871-DNA_A03	45.6529	570649	17796	3500004	2.07726
LP6005871-DNA_A10	45.5771	561689	17296	3487078	2.0789
LP6005871-DNA_B03	48.2837	570758	16808	3478165	2.07895
LP6005871-DNA_B10	44.7021	557576	18502	3492985	2.07832
LP6005871-DNA_C02	50.5161	556148	16791	3427506	2.07972
LP6005871-DNA_C03	47.7915	575118	17189	3465178	2.08069
LP6005871-DNA_D02	46.5491	559690	17753	3482076	2.08082
LP6005871-DNA_E02	45.2346	541158	18920	3446485	2.08016
LP6005871-DNA_F02	48.6593	566888	18360	3486589	2.07945
LP6005871-DNA_H02	42.2947	566730	17526	3504230	2.07956
LP6005871-DNA_H09	45.776	559853	19785	3483591	2.08339
LP6005872-DNA_A12	53.2652	573387	17991	3478054	2.08054
LP6005872-DNA_B11	51.8176	565420	17703	3478266	2.08088
LP6005872-DNA_B12	50.6719	570534	18069	3481350	2.07867
LP6005872-DNA_H10	48.4263	565811	17802	3480795	2.0806
LP6005873-DNA_C12	40.1815	539930	19079	3471197	2.08126
LP6005873-DNA_D12	40.9609	540827	17338	3468125	2.07982
LP6005874-DNA_G07	43.9866	561467	19067	3482810	2.07898
LP6005872-DNA_D10	45.9968	557011	18371	3492987	2.07792
LP6005869-DNA_E04	44.1164	562887	22159	3483256	2.07991
LP6005872-DNA_H06	47.9863	561870	20839	3469897	2.07945
LP6005871-DNA_E03	45.9897	574436	18683	3473805	2.08038
LP6005872-DNA_G06	49.2028	557881	20404	3473081	2.08023
LP6005869-DNA_G04	44.8133	561246	18393	3493401	2.08218
LP6005872-DNA_D09	55.0053	559939	17435	3466144	2.08043
LP6005872-DNA_C06	52.6385	568767	19281	3446773	2.07887
LP6005872-DNA_A11	51.2548	568652	18744	3483058	2.07959
LP6005872-DNA_E10	49.1616	555787	19428	3479806	2.07873
LP6005871-DNA_G06	42.4173	543511	18521	3468073	2.08234
LP6005871-DNA_G01	45.6196	556677	17664	3497557	2.08024
LP6005869-DNA_B08	45.5919	553626	17529	3476131	2.08268
LP6005871-DNA_H01	44.8256	549458	20740	3500252	2.07995
LP6005874-DNA_F08	42.7729	567129	19282	3472264	2.07944
LP6005869-DNA_D10	45.7774	563928	18121	3489488	2.08048
LP6005874-DNA_C06	47.3085	571759	17489	3482671	2.07812
LP6005872-DNA_C11	53.2397	562139	17636	3473587	2.0792
LP6005871-DNA_E01	46.5848	568406	17963	3488431	2.07943
LP6005872-DNA_F06	52.7126	563797	20209	3479026	2.08386
LP6005869-DNA_H04	42.4995	554412	18691	3480529	2.07881
LP6005871-DNA_A09	47.2759	568239	17625	3489606	2.08017
LP6005872-DNA_E06	53.0037	574689	19446	3487869	2.08004
LP6005869-DNA_C08	41.9255	552747	17909	3503042	2.07832
LP6005869-DNA_A08	46.599	560147	18130	3496111	2.07766
LP6005871-DNA_F01	45.9784	562411	29236	3536252	2.07944
LP6005872-DNA_D06	53.4701	574757	18515	3481440	2.07953
LP6005869-DNA_F04	48.9621	566959	17357	3476329	2.08258
LP6005871-DNA_D03	50.1513	581355	19350	3506001	2.0787
LP6005871-DNA_F04	43.9755	547740	18762	3450522	2.07818
LP6005871-DNA_G02	46.7147	566837	17605	3490221	2.07641
LP6005873-DNA_A04	43.3128	561506	17398	3479584	2.07948
LP6005873-DNA_A10	48.2287	560466	18477	3493137	2.07708
LP6005873-DNA_A12	47.5261	555346	18619	3471201	2.07912
LP6005873-DNA_B12	52.0441	561087	18469	3477099	2.07849
LP6005873-DNA_C06	43.7616	562871	19329	3479004	2.0777
LP6005873-DNA_C07	50.8097	556971	18411	3492826	2.07785
LP6005873-DNA_D06	47.8498	556955	16557	3468028	2.07898
LP6005873-DNA_D11	48.6456	561155	16629	3480475	2.07757
LP6005873-DNA_E11	46.6002	563726	18807	3483955	2.07432
LP6005873-DNA_E12	46.0598	561797	19374	3469176	2.07945
LP6005873-DNA_F03	33.5782	528869	18933	3478609	2.08038
LP6005873-DNA_F11	39.6499	548930	18657	3490399	2.07881
LP6005873-DNA_F12	36.2065	538857	17363	3476302	2.08116
LP6005873-DNA_G11	48.9567	555679	19748	3463600	2.08006
LP6005873-DNA_G12	48.8518	572273	18704	3500359	2.07774
LP6005873-DNA_H06	45.7277	564754	18272	3499725	2.08037
LP6005873-DNA_H12	47.6288	566540	18217	3494691	2.07922
LP6005874-DNA_A11	43.4101	573025	18833	3471709	2.07817
LP6005874-DNA_B08	47.7364	567896	19430	3510660	2.08063
LP6005874-DNA_C11	46.7729	563517	18623	3468623	2.08041
LP6005874-DNA_D11	42.2908	549574	16825	3481112	2.07823
LP6005874-DNA_F10	43.1319	561716	18173	3505865	2.07856
LP6005874-DNA_F12	42.0262	552917	17987	3494319	2.08083
LP6005874-DNA_G02	44.2984	565473	20478	3482990	2.07846
LP6005874-DNA_G03	49.2833	546347	19582	3479546	2.07802
LP6005875-DNA_A05	51.1415	568509	20372	3490996	2.07961
LP6005875-DNA_B04	46.1629	547392	16983	3470351	2.07974
LP6005875-DNA_C01	50.5949	572334	18932	3483565	2.07887
LP6005875-DNA_D04	37.665	531365	18488	3482944	2.07694
LP6005875-DNA_E02	35.6122	538567	17700	3483795	2.07847
LP6005875-DNA_F06	50.6954	576361	17940	3472131	2.08018
LP6005875-DNA_G03	48.4433	543357	20381	3471377	2.08008
LP6005875-DNA_G04	52.1725	569280	18525	3495865	2.0798
LP6005875-DNA_G06	49.8257	576524	18584	3483717	2.07839
LP6005875-DNA_H01	35.5256	541454	20247	3489393	2.07981
LP6005876-DNA_A02	50.4768	571656	19304	3511376	2.07537
LP6005876-DNA_A04	40.8845	531979	18252	3469282	2.08066
LP6005876-DNA_B02	54.2575	570005	18311	3490874	2.07834
LP6005876-DNA_B04	39.7666	532370	18683	3475901	2.08027
LP6005876-DNA_B05	48.7508	583718	17677	3502502	2.0798
LP6005876-DNA_C01	47.3323	575795	17383	3483309	2.08037
LP6005876-DNA_C02	45.9961	562140	19565	3482991	2.08038
LP6005876-DNA_C04	44.5328	550836	21073	3503696	2.08086
LP6005876-DNA_D01	50.2878	567195	18405	3478844	2.08177
LP6005876-DNA_D02	44.3246	556609	18294	3485857	2.07692
LP6005876-DNA_D04	41.3078	563751	18333	3503515	2.08129
LP6005876-DNA_D05	51.7668	577982	18302	3496825	2.0819
LP6005876-DNA_E02	47.2601	557281	19539	3480981	2.07752
LP6005876-DNA_E04	47.2899	573638	17650	3490600	2.0801
LP6005876-DNA_E05	47.7168	549873	18042	3509015	2.08089
LP6005876-DNA_F01	47.5399	560981	17185	3470242	2.07682
LP6005876-DNA_F02	43.3813	557315	17241	3477812	2.07954
LP6005876-DNA_F03	44.1905	547029	18429	3502181	2.07936
LP6005876-DNA_F05	45.9145	542232	18110	3479255	2.08006
LP6005876-DNA_G01	48.9436	559426	18597	3484318	2.07996
LP6005876-DNA_G02	47.5224	559504	21725	3486552	2.07841
LP6005876-DNA_G03	40.6918	529179	17287	3444833	2.08124
LP6005876-DNA_H09	45.6095	569481	18423	3493012	2.08016
LP6005876-DNA_H08	49.2281	568584	19829	3477445	2.08143
LP6005876-DNA_H05	47.7734	580138	18905	3508848	2.08141
LP6005876-DNA_G07	49.7099	565380	18969	3487967	2.07863
LP6005876-DNA_F08	49.6179	566105	35877	3527012	2.07945
LP6005876-DNA_F07	49.6863	565133	18476	3475528	2.07891
LP6005876-DNA_F06	51.7097	566935	18435	3492952	2.07827
LP6005876-DNA_E08	46.6786	557382	16466	3493671	2.08066
LP6005876-DNA_E07	48.3768	562282	17342	3479135	2.0787
LP6005876-DNA_D09	50.4696	568023	20241	3475118	2.07884
LP6005876-DNA_D08	47.0811	556899	20257	3501960	2.07834
LP6005876-DNA_D07	47.4208	547110	19896	3484157	2.0781
LP6005876-DNA_D06	50.2619	557887	17395	3499500	2.07951
LP6005876-DNA_C09	52.0606	566228	18213	3493212	2.08036
LP6005876-DNA_C08	47.0932	556967	21843	3496951	2.07917
LP6005876-DNA_C06	48.9553	573350	48133	3597328	2.07986
LP6005876-DNA_B09	50.7928	566000	18220	3491141	2.08223
LP6005876-DNA_B08	46.2321	556364	18051	3489920	2.08049
LP6005876-DNA_B07	46.7229	540707	19998	3483962	2.08079
LP6005876-DNA_A10	46.9544	568815	17017	3470604	2.07998
LP6005876-DNA_A08	45.6254	558154	19591	3489349	2.07867
LP6005876-DNA_A07	44.7801	536256	17977	3463544	2.08045
LP6005876-DNA_A06	46.7908	581362	17886	3485113	2.0789
LP6005875-DNA_H07	49.0985	557226	17950	3495819	2.0775
LP6005875-DNA_G07	49.5431	553884	17701	3487238	2.07681
LP6005875-DNA_D08	50.1519	560279	18377	3476779	2.08103
LP6005875-DNA_D05	49.6271	569908	19853	3499052	2.0783
LP6005875-DNA_C09	52.3966	571263	18787	3497905	2.07818
LP6005875-DNA_C05	45.8454	553115	19539	3458171	2.07951
LP6005875-DNA_B09	33.7808	538980	18635	3494474	2.07939
LP6005875-DNA_B08	46.032	556538	17788	3478447	2.08246
LP6005875-DNA_B05	47.3678	562375	18493	3496814	2.0785
LP6005875-DNA_A08	49.2702	561443	20040	3492957	2.07808
LP6005875-DNA_A01	52.3877	570857	20830	3467161	2.07993
LP6005875-DNA_A02	43.4267	550250	17579	3480646	2.08206
LP6005875-DNA_A03	48.2045	566113	17767	3485385	2.0797
LP6005875-DNA_A06	51.3402	574273	18805	3493619	2.08231
LP6005875-DNA_B01	51.167	569716	17545	3479536	2.07751
LP6005875-DNA_B02	39.8677	539277	17794	3471773	2.07905
LP6005875-DNA_B06	52.3938	574172	19046	3478513	2.08046
LP6005875-DNA_C06	54.635	587749	18853	3497820	2.07983
LP6005875-DNA_D01	49.9082	581594	19459	3492622	2.07889
LP6005875-DNA_D02	48.9092	563424	17324	3479440	2.07914
LP6005875-DNA_D06	53.026	583194	16564	3475540	2.07936
LP6005875-DNA_E01	47.86	574917	17512	3481468	2.07929
LP6005875-DNA_E03	49.9231	560722	19743	3491216	2.07922
LP6005875-DNA_E04	50.9378	567878	20069	3515468	2.08248
LP6005875-DNA_E05	51.5898	571808	17936	3479000	2.0799
LP6005875-DNA_F01	50.3994	575570	19231	3469254	2.07849
LP6005875-DNA_F02	54.6	574262	18596	3472238	2.07865
LP6005875-DNA_F03	51.1721	560183	18411	3479406	2.07928
LP6005875-DNA_F05	51.67	576247	17981	3488909	2.07954
LP6005875-DNA_G01	48.7589	573392	18107	3502279	2.07844
LP6005875-DNA_G02	52.5229	566685	20544	3491692	2.07862
LP6005875-DNA_H02	53.059	561732	18536	3471989	2.08063
LP6005875-DNA_H04	49.936	566087	18820	3478644	2.07957
LP6005875-DNA_H05	34.9585	537072	17241	3471004	2.07785
LP6005876-DNA_D03	45.0371	556925	18604	3481003	2.0797
LP6005875-DNA_A04	47.1157	551663	17911	3479669	2.08021
LP6005875-DNA_A09	43.5908	552474	16956	3473549	2.08058
LP6005875-DNA_C04	52.573	555876	17969	3488575	2.08
LP6005875-DNA_H03	50.868	560240	18330	3470748	2.08103
LP6005875-DNA_H08	45.2948	550408	20335	3493304	2.07838
LP6005876-DNA_A03	44.829	550943	18306	3489844	2.08134
LP6005876-DNA_A11	42.4879	545763	17027	3467923	2.07988
LP6005876-DNA_B03	41.9772	540762	17908	3486472	2.08071
LP6005876-DNA_C03	45.0569	550569	20899	3492396	2.0772
LP6005876-DNA_C05	36.441	561550	18197	3502870	2.07957
LP6005876-DNA_E11	47.5734	558136	17217	3475871	2.07936
LP6005876-DNA_F11	46.1447	558753	17700	3495576	2.07938
LP6005876-DNA_G10	42.9377	548498	18455	3481090	2.07961
LP6005876-DNA_G12	47.3143	561543	16152	3502010	2.07763
LP6005876-DNA_H10	41.7307	541746	17614	3469878	2.07856
LP6005876-DNA_H12	49.4961	555142	18150	3464981	2.07818
LP6005877-DNA_A06	46.3027	551482	19043	3498255	2.07967
LP6005877-DNA_A08	45.0505	565275	19057	3499612	2.07793
LP6005877-DNA_B06	48.8973	556007	18790	3481923	2.08037
LP6005877-DNA_B07	41.6724	534910	18270	3477156	2.08027
LP6005877-DNA_B08	48.4819	563105	18690	3483763	2.08169
LP6005877-DNA_C06	49.4562	561796	19988	3470545	2.08215
LP6005877-DNA_C07	51.5751	564152	17918	3487991	2.08153
LP6005877-DNA_D05	45.6898	559568	18282	3471552	2.07737
LP6005877-DNA_D07	53.4959	564453	17452	3480244	2.07911
LP6005877-DNA_E05	48.3046	560269	18633	3479419	2.08367
LP6005877-DNA_E06	42.1221	538552	19353	3486739	2.07854
LP6005877-DNA_F07	49.3725	564803	17259	3494126	2.08035
LP6005877-DNA_G05	47.7363	559746	18457	3486181	2.07677
LP6005877-DNA_G07	47.6301	558624	18290	3486818	2.07709
LP6005877-DNA_G08	38.3349	547998	18928	3474198	2.07909
LP6005877-DNA_H05	47.1612	558528	19986	3503799	2.07803
LP6005877-DNA_C08	45.8793	556273	19036	3477352	2.07905
LP6005877-DNA_D08	43.8656	555596	19168	3490899	2.07871
LP6005877-DNA_E08	45.1854	557876	18172	3479668	2.07955
LP6005875-DNA_H12	47.5333	563753	23769	3484559	2.08386
LP6005875-DNA_H11	55.4208	564208	17197	3468961	2.0805
LP6005875-DNA_H10	45.0965	552849	17289	3482886	2.07862
LP6005876-DNA_C12	45.1003	577526	47519	3720704	2.08273
LP6005875-DNA_E09	53.0163	561604	21091	3507403	2.0803
LP6005875-DNA_F10	39.0536	525755	18239	3476134	2.07851
LP6005875-DNA_G09	53.2847	555604	18799	3482379	2.07911
LP6005875-DNA_E12	50.1144	593211	38894	3664817	2.08156
LP6005875-DNA_D10	46.3256	547262	18309	3474098	2.0787
LP6005875-DNA_E11	52.187	566635	19529	3500743	2.08106
LP6005875-DNA_A12	52.7464	579351	46389	3563264	2.0788
LP6005875-DNA_C12	52.3584	565123	18244	3481028	2.07768
LP6005875-DNA_B10	48.1208	553196	18018	3482826	2.07917
LP6005875-DNA_H09	53.2439	553799	17970	3452212	2.0804
LP6005875-DNA_D12	53.9753	569204	14381	3499234	2.07911
LP6005875-DNA_F12	47.0719	561993	19147	3493053	2.07923
LP6005877-DNA_D02	44.4746	551883	18986	3470799	2.08158
LP6005877-DNA_C01	46.8677	571254	17867	3477329	2.081
LP6005877-DNA_B03	45.9097	560434	20463	3482806	2.07896
LP6005877-DNA_E02	47.3758	559243	19243	3492463	2.08162
LP6005877-DNA_G02	45.552	534859	17169	3472862	2.08102
LP6005877-DNA_F04	52.1513	576576	18055	3462300	2.08262
LP6005877-DNA_A04	46.3167	575634	36162	3553037	2.07755
LP6005877-DNA_H04	50.9155	580364	19295	3495971	2.07906
LP6005877-DNA_H01	41.797	539197	17670	3482702	2.07839
LP6005877-DNA_F02	46.6463	552248	18226	3492835	2.07957
LP6005877-DNA_E01	47.5858	566744	17972	3488824	2.07926
LP6005875-DNA_G08	34.8663	522967	19364	3476057	2.07812
LP6005877-DNA_G03	46.3683	565037	17968	3484456	2.07909
LP6005877-DNA_A02	49.5911	564143	17029	3492653	2.07902
LP6005877-DNA_G04	53.0738	579173	17605	3473893	2.08108
LP6005877-DNA_H02	43.5294	537100	17500	3465216	2.08189
LP6005877-DNA_G01	42.675	537103	21997	3479041	2.07751
LP6005877-DNA_H03	47.9178	570292	17918	3485481	2.07983
LP6005877-DNA_D04	49.8137	582612	27415	3504735	2.07891
LP6005875-DNA_A11	44.8273	554541	16769	3482473	2.07971
LP6005877-DNA_C03	45.2986	555739	18873	3475180	2.08128
LP6005877-DNA_A01	45.7255	569342	18026	3480234	2.08002
LP6005877-DNA_B02	45.07	562276	17530	3474294	2.0772
LP6005877-DNA_F01	45.2822	554050	18641	3479803	2.08129
LP6005876-DNA_A09	52.3167	573086	17359	3479619	2.08086
LP6005875-DNA_C03	51.8969	567569	18853	3492678	2.07975
LP6005876-DNA_E10	48.1895	561124	19992	3493128	2.07899
LP6005876-DNA_E09	47.9471	577421	18244	3486437	2.08339
LP6005876-DNA_G08	48.2509	568348	18213	3470768	2.07996
LP6005876-DNA_G05	51.148	572597	17460	3464652	2.07703
LP6005875-DNA_A07	48.8165	566943	17976	3476782	2.0833
LP6005876-DNA_C10	53.2252	586671	17974	3483969	2.07893
LP6005876-DNA_D10	35.2798	548427	17549	3469517	2.07928
LP6005875-DNA_B07	39.1401	544981	18939	3465446	2.08157
LP6005876-DNA_A05	43.8155	550516	18999	3469454	2.08109
LP6005875-DNA_E06	34.4498	551335	18353	3492281	2.07868
LP6005875-DNA_F08	52.3703	559442	19049	3493440	2.08088
LP6005876-DNA_B06	48.5079	557455	17554	3474496	2.07673
LP6005876-DNA_F04	48.615	565619	19986	3494333	2.08054
LP6005875-DNA_D03	48.7242	565457	18226	3477560	2.07788
LP6005876-DNA_B12	45.4956	546957	18159	3475876	2.0819
LP6005875-DNA_C07	52.687	563121	17905	3472637	2.0797
LP6005876-DNA_B11	47.4386	584401	61780	3570342	2.07668
LP6005876-DNA_H06	48.4508	539915	19167	3476088	2.0799
LP6005876-DNA_E06	51.6251	568713	25006	3479384	2.07818
LP6005876-DNA_H11	47.3177	567044	16684	3481040	2.07912
LP6005876-DNA_G06	47.895	548754	20646	3478299	2.07734
LP6005876-DNA_A12	45.3167	563581	17728	3487014	2.08079
LP6005876-DNA_F09	48.4241	573308	17016	3478204	2.07915
LP6005875-DNA_E08	49.473	561027	18101	3511382	2.07983
LP6005876-DNA_B10	52.1023	585642	18576	3478242	2.07739
LP6005875-DNA_B03	47.6476	561982	19669	3498230	2.08055
LP6005876-DNA_G04	45.5726	553717	19297	3468462	2.08035
LP6005876-DNA_G09	45.8145	570629	19309	3507223	2.07903
LP6005876-DNA_G11	49.4924	562525	19186	3459351	2.07815
LP6005875-DNA_C02	41.8675	559708	18252	3493594	2.08188
LP6005875-DNA_C08	44.6957	559253	18121	3492846	2.08129
LP6005877-DNA_D06	33.2096	531669	17282	3490892	2.07845
LP6005877-DNA_E07	46.4669	560540	19530	3475944	2.08262
LP6005877-DNA_F05	35.9375	530647	19092	3486104	2.07752
LP6005877-DNA_F08	42.4768	553448	17684	3491593	2.07878
LP6005875-DNA_B12	49.5597	570054	19731	3493092	2.07755
LP6005875-DNA_F09	51.5253	556820	19427	3479385	2.08171
LP6005876-DNA_C07	48.1977	554478	19153	3489869	2.07876
LP6005876-DNA_C11	34.0837	536966	19816	3482532	2.07912
LP6005876-DNA_D11	34.0283	541965	17463	3483216	2.08074
LP6005877-DNA_A05	49.6689	577179	16924	3460318	2.08065
LP6005877-DNA_B01	45.9612	566900	20561	3472082	2.08141
LP6005877-DNA_B04	46.7124	560432	20186	3496578	2.07989
LP6005877-DNA_B05	50.5131	580849	18982	3464335	2.07673
LP6005877-DNA_C02	47.2687	564910	19398	3485164	2.08103
LP6005877-DNA_C04	49.6842	560999	19298	3467409	2.07881
LP6005877-DNA_C05	48.2864	581443	18356	3484803	2.07849
LP6005877-DNA_D01	50.8106	569016	17912	3479731	2.07726
LP6005877-DNA_D03	46.3482	553877	17093	3483674	2.078
LP6005877-DNA_E03	45.5886	553756	17710	3484271	2.07833
LP6005877-DNA_E04	50.2788	574154	16973	3470166	2.07821
LP6005877-DNA_F03	46.6861	560703	19813	3486249	2.07973
LP6005877-DNA_B09	50.1614	571247	18655	3486368	2.07898
LP6005877-DNA_C09	47.5057	567714	19602	3487723	2.07945
LP6005876-DNA_A01	49.2493	571489	17608	3451874	2.07884
LP6005876-DNA_B01	48.2624	576642	19470	3478842	2.08005
LP6005876-DNA_E01	49.1506	565593	19707	3484501	2.08037
LP6005877-DNA_A07	45.5758	554640	18245	3485790	2.08027
LP6005877-DNA_H06	41.2165	530164	17265	3467728	2.07988
LP6005877-DNA_A03	42.8588	543296	18114	3492555	2.07878
LP6005877-DNA_A09	45.6788	573181	18694	3498438	2.08133
LP6005877-DNA_A10	48.6446	556903	17243	3473752	2.08181
LP6005877-DNA_B10	47.2775	558328	18355	3476539	2.08146
LP6005877-DNA_C10	46.3298	555829	17341	3470486	2.07804
LP6005877-DNA_D09	48.3329	565666	21604	3526178	2.0778
LP6005877-DNA_D10	42.2906	565021	17699	3489051	2.08159
LP6005877-DNA_E09	46.9198	558138	18413	3471382	2.07926
LP6005877-DNA_E10	46.5227	570755	17878	3489445	2.0818
LP6005877-DNA_F06	42.4049	536555	19119	3493008	2.07636
LP6005877-DNA_F09	47.4344	557771	17925	3475888	2.08133
LP6005877-DNA_G06	41.6643	530688	17251	3472802	2.07986
LP6005877-DNA_G09	47.9702	561951	18832	3493012	2.08021
LP6005877-DNA_H09	46.8766	554150	16881	3466406	2.07752
LP6005875-DNA_A10	53.9971	571382	17604	3466753	2.07991
LP6005875-DNA_B11	55.688	559165	14159	3486020	2.07993
LP6005875-DNA_E10	44.8123	549565	20152	3495019	2.07626
LP6005875-DNA_F11	46.1599	544572	17682	3468764	2.08208
LP6005875-DNA_G11	46.1667	540642	16380	3482709	2.08101
LP6005875-DNA_G12	44.5919	546691	17658	3480316	2.0795
LP6005877-DNA_H08	55.0087	560164	18774	3492715	2.08119
LP6005880-DNA_C05	50.7651	570292	18460	3474231	2.07796
LP6008183-DNA_A01	42.966	784733	18066	3499574	2.07891
LP6008183-DNA_B01	43.1181	791674	22426	3512299	2.07656
LP6008183-DNA_E01	43.522	783830	19769	3477723	2.0772
LP6008183-DNA_F01	51.1785	799280	21096	3497451	2.07951
LP6008183-DNA_A02	46.1324	795885	38649	3521577	2.07618
LP6008183-DNA_B02	57.5759	793126	18852	3471785	2.07912
LP6008183-DNA_E02	47.0027	786322	18320	3493488	2.07958
LP6008183-DNA_F02	48.8341	792393	18172	3493348	2.07656
LP6008183-DNA_A03	63.6976	799547	20120	3480530	2.07741
LP6008183-DNA_B03	45.4726	786353	19324	3490396	2.07872
LP6008183-DNA_C03	48.1308	797727	19279	3510622	2.07751
LP6008183-DNA_E03	44.6833	795107	20803	3482501	2.07704
LP6008183-DNA_F03	46.5634	792077	23232	3502814	2.07664
LP6008183-DNA_A04	45.1471	790688	19539	3507605	2.07844
LP6008183-DNA_B04	44.3095	790547	19320	3503854	2.07745
LP6008183-DNA_E04	46.5728	789412	17994	3485521	2.07973
LP6008183-DNA_F04	50.258	788338	19626	3498340	2.07535
LP6008183-DNA_A05	45.9436	792087	17955	3496095	2.07997
LP6008183-DNA_B05	66.9226	796056	20403	3493141	2.07855
LP6008183-DNA_E05	42.7634	783603	18971	3498333	2.07732
LP6008183-DNA_F05	46.6965	789247	19583	3482052	2.07788
LP6008183-DNA_B06	50.8649	798224	20473	3485861	2.07691
LP6008183-DNA_E06	48.2902	784320	20589	3477236	2.07875
LP6008183-DNA_F06	46.3871	787323	18289	3497734	2.079
LP6008183-DNA_A07	47.8993	788083	20220	3491425	2.07835
LP6008183-DNA_B07	41.4157	777588	22214	3496737	2.0784
LP6008183-DNA_E07	47.5183	795091	36964	3545459	2.07706
LP6008183-DNA_F07	50.2359	791518	19090	3485586	2.07753
LP6008183-DNA_A08	40.3093	779009	18387	3471290	2.07544
LP6008183-DNA_B08	49.4751	792615	21460	3502459	2.07609
LP6008183-DNA_E08	49.1546	787192	18669	3471254	2.07937
LP6008183-DNA_F08	49.0796	788346	17698	3484702	2.07871
LP6008183-DNA_A09	44.8468	771937	19509	3474977	2.07809
LP6008183-DNA_B09	48.2475	795883	18573	3498279	2.07886
LP6008183-DNA_E09	42.446	777029	19041	3496039	2.07807
LP6008183-DNA_F09	45.5003	779635	13778	3482892	2.07949
LP6008183-DNA_A10	44.7543	778101	19511	3481372	2.07797
LP6008183-DNA_B10	45.8789	781096	19536	3475723	2.08093
LP6008183-DNA_E10	45.5055	783680	18983	3486138	2.07782
LP6008183-DNA_F10	42.7644	781447	22175	3485164	2.07862
LP6008183-DNA_A11	42.6921	775355	18739	3478512	2.07863
LP6008183-DNA_B11	41.0655	784805	18541	3492370	2.07767
LP6008183-DNA_E11	45.1193	792622	22387	3495941	2.07898
LP6008183-DNA_F11	51.3929	801606	19219	3497458	2.07943
LP6008183-DNA_A12	51.3035	795859	21798	3487991	2.07757
LP6008183-DNA_B12	51.5569	796273	21141	3479429	2.07998
LP6008183-DNA_E12	50.7293	812638	37582	3559333	2.07916
LP6008183-DNA_F12	45.6555	789166	19540	3480316	2.0756
LP6008184-DNA_A01	51.7057	790945	21664	3493604	2.08109
LP6008184-DNA_D01	44.7955	784400	18101	3467440	2.07726
LP6008184-DNA_E01	44.7252	788206	19922	3486779	2.07677
LP6008184-DNA_H01	45.6683	790763	18286	3502034	2.07516
LP6008184-DNA_A02	44.521	790510	19544	3504883	2.07867
LP6008184-DNA_D02	46.6901	791020	18881	3495953	2.07654
LP6008184-DNA_E02	46.8746	794551	18052	3504929	2.07597
LP6008184-DNA_H02	46.5484	778539	19795	3469733	2.07989
LP6008184-DNA_A03	47.9187	785352	20303	3497442	2.07877
LP6008184-DNA_D03	57.5432	791552	18005	3483824	2.07921
LP6008184-DNA_E03	45.496	784994	20198	3502550	2.07915
LP6008184-DNA_H03	48.3058	788256	19368	3482403	2.07636
LP6008184-DNA_A04	48.1352	784061	18366	3465537	2.08019
LP6008184-DNA_D04	47.9543	792718	18178	3493026	2.07593
LP6008184-DNA_E04	44.5226	792086	18720	3496933	2.0783
LP6008184-DNA_H04	43.3105	794903	19226	3476635	2.0769
LP6008184-DNA_A05	47.3353	794363	19433	3493793	2.07542
LP6008184-DNA_D05	47.1538	787552	18337	3481517	2.07759
LP6008184-DNA_E05	49.2862	789819	18249	3481916	2.07745
LP6008184-DNA_H05	41.642	774669	21088	3481956	2.0795
LP6008184-DNA_D06	44.6844	791067	18621	3492718	2.07799
LP6008184-DNA_E06	36.8996	776050	22160	3483618	2.07763
LP6008184-DNA_H06	40.3501	785954	20016	3490734	2.07977
LP6008184-DNA_A07	47.014	794065	19056	3493423	2.07827
LP6008184-DNA_D07	45.3297	797278	20035	3499987	2.07949
LP6008184-DNA_E07	62.4747	802351	19459	3505600	2.07726
LP6008184-DNA_H07	46.4681	791087	21570	3484722	2.07912
LP6008184-DNA_A08	44.2089	786978	19201	3486435	2.08107
LP6008184-DNA_D08	45.8216	791748	22104	3504518	2.07865
LP6008184-DNA_E08	45.795	793074	18789	3494810	2.07893
LP6008184-DNA_H08	42.7251	783308	18943	3481166	2.07906
LP6008184-DNA_A09	46.0572	791216	19326	3478074	2.07843
LP6008184-DNA_D09	45.1561	789715	19807	3493420	2.07745
LP6008184-DNA_E09	44.894	780649	19856	3466101	2.07716
LP6008184-DNA_H09	44.7292	787608	18401	3483518	2.07962
LP6008184-DNA_A10	46.6732	793095	19231	3477702	2.07793
LP6008184-DNA_E10	49.0479	803790	20250	3511657	2.0766
LP6008184-DNA_H10	52.9233	795049	19959	3487809	2.07902
LP6008184-DNA_A11	42.6477	786149	19303	3483543	2.0746
LP6008184-DNA_D11	38.6522	780551	17872	3479156	2.07846
LP6008184-DNA_E11	42.7955	782855	19637	3485143	2.08051
LP6008184-DNA_H11	43.1573	781211	18391	3489835	2.07829
LP6008184-DNA_A12	39.5065	784810	20668	3488412	2.07749
LP6008184-DNA_D12	44.78	796963	20233	3507232	2.07787
LP6008184-DNA_E12	44.5506	786627	18786	3496492	2.07854
LP6008184-DNA_G12	38.4096	779207	19493	3490571	2.0801
LP6008184-DNA_H12	43.4526	788441	19645	3501214	2.08076
LP6008185-DNA_A01	46.2733	789915	19134	3494816	2.07921
LP6008185-DNA_B01	57.2843	789822	18901	3475289	2.07695
LP6008185-DNA_F01	42.5511	784409	18970	3473237	2.07922
LP6008185-DNA_G01	42.607	778448	18565	3461918	2.08047
LP6008185-DNA_H01	45.8545	788494	18001	3474364	2.07559
LP6008185-DNA_A02	44.4628	785469	18072	3488909	2.07665
LP6008185-DNA_B02	42.6	778313	21163	3489756	2.07903
LP6008185-DNA_F02	49.0927	787247	19672	3461889	2.07991
LP6008185-DNA_G02	57.0056	794477	19721	3482312	2.07744
LP6008185-DNA_H02	44.9384	805825	47811	3555720	2.07774
LP6008185-DNA_A03	40.8929	789251	19785	3501952	2.07923
LP6008185-DNA_B03	43.8438	789304	19795	3484961	2.07728
LP6008185-DNA_F03	42.405	787571	19167	3489665	2.07856
LP6008185-DNA_G03	43.5299	788461	19728	3483040	2.07945
LP6008185-DNA_H03	44.9613	776573	19373	3469900	2.07548
LP6008185-DNA_A04	46.0155	787809	19640	3492017	2.07664
LP6008185-DNA_B04	48.1057	783192	19200	3491028	2.07683
LP6008185-DNA_F04	40.9047	777628	18884	3477209	2.0801
LP6008185-DNA_G04	40.3369	786728	22255	3480833	2.08046
LP6008185-DNA_H04	40.6854	780443	19849	3488753	2.07599
LP6008185-DNA_A05	38.3085	783810	21516	3498264	2.07734
LP6008185-DNA_B05	48.3904	793942	20654	3474195	2.07952
LP6008185-DNA_F05	45.3603	790987	19282	3485485	2.07885
LP6008185-DNA_G05	40.2367	791485	19800	3486778	2.07694
LP6008185-DNA_H05	45.5983	793977	22305	3502040	2.07821
LP6008185-DNA_A06	36.8208	787433	17949	3495249	2.07883
LP6008185-DNA_B06	44.6221	779140	17871	3447851	2.07786
LP6008185-DNA_F06	45.7325	786862	19770	3490043	2.07949
LP6008185-DNA_G06	44.3039	788149	23111	3505329	2.07683
LP6008185-DNA_H06	44.6392	785982	20540	3485881	2.08209
LP6008185-DNA_A07	47.3472	791800	19142	3491255	2.08186
LP6008185-DNA_B07	60.1048	792081	18576	3475186	2.08005
LP6008185-DNA_F07	43.9478	789049	19880	3496935	2.07917
LP6008185-DNA_G07	47.639	793070	20500	3483242	2.08053
LP6008185-DNA_H07	45.5519	793588	18992	3489094	2.07842
LP6008185-DNA_A08	47.2103	790320	19537	3481807	2.0798
LP6008185-DNA_B08	48.0448	788393	20073	3478380	2.08121
LP6008185-DNA_F08	45.3219	786675	18717	3480782	2.07565
LP6008185-DNA_G08	48.639	788565	18057	3486688	2.07852
LP6008185-DNA_H08	47.774	789434	18623	3474766	2.07572
LP6008185-DNA_A09	47.421	786737	17417	3466227	2.07682
LP6008185-DNA_B09	41.788	786340	20966	3497301	2.07765
LP6008185-DNA_F09	44.5387	785884	18563	3483877	2.07854
LP6008185-DNA_H09	46.8623	787460	19566	3485908	2.07927
LP6008185-DNA_A10	46.5145	790721	19118	3501481	2.08042
LP6008185-DNA_B10	38.6739	773622	19923	3476507	2.07912
LP6008185-DNA_F10	47.0208	787270	20715	3489438	2.07802
LP6008185-DNA_G10	45.3154	784243	19061	3483571	2.08152
LP6008185-DNA_H10	45.3992	795675	21486	3495807	2.07796
LP6008185-DNA_A11	42.9568	781084	23711	3492093	2.0776
LP6008185-DNA_B11	46.9107	791220	19887	3486257	2.07868
LP6008185-DNA_F11	43.1734	776895	19556	3475070	2.07987
LP6008185-DNA_G11	45.8903	791452	19401	3484134	2.08178
LP6008185-DNA_H11	44.3906	777923	19376	3477269	2.0782
LP6008185-DNA_A12	40.3899	775519	20327	3467407	2.07779
LP6008185-DNA_B12	43.8522	793260	19220	3525640	2.08095
LP6008185-DNA_F12	43.0079	785762	19007	3487481	2.0809
LP6008185-DNA_G12	43.5427	789692	17756	3490187	2.07687
LP6008185-DNA_H12	44.4524	789821	18938	3483591	2.08113
LP6008186-DNA_C01	45.2655	791665	23047	3498368	2.07844
LP6008186-DNA_D01	46.1268	788612	18503	3475794	2.07912
LP6008186-DNA_E01	47.5458	778159	18798	3434619	2.07678
LP6008186-DNA_G01	45.5834	780188	20684	3472163	2.07825
LP6008186-DNA_H01	45.8353	785624	17925	3484646	2.0775
LP6008186-DNA_C02	50.4512	800991	19575	3499541	2.07772
LP6008186-DNA_D02	48.1056	796136	20819	3486113	2.08256
LP6008186-DNA_G02	49.5637	794776	19129	3483791	2.07652
LP6008186-DNA_H02	48.9253	793869	18189	3478507	2.07748
LP6008186-DNA_C03	49.4992	795014	20317	3490732	2.07714
LP6008186-DNA_D03	49.3657	789769	19502	3480744	2.0781
LP6008186-DNA_E03	49.1728	791315	17569	3483760	2.07733
LP6008186-DNA_G03	48.2224	771024	18989	3401798	2.07828
LP6008186-DNA_H03	38.3914	778184	20175	3493918	2.08047
LP6008186-DNA_C04	45.191	787453	17880	3472539	2.08137
LP6008186-DNA_D04	38.8478	784288	20685	3488557	2.07539
LP6008186-DNA_E04	48.1564	786984	19197	3467564	2.07989
LP6008186-DNA_G04	43.6791	786640	18152	3491205	2.0776
LP6008186-DNA_H04	48.0975	790677	20998	3495888	2.08058
LP6008186-DNA_C05	45.7058	780979	19934	3482438	2.08067
LP6008186-DNA_D05	46.808	783049	19858	3463020	2.07836
LP6008186-DNA_E05	49.3029	793891	22382	3488640	2.07691
LP6008186-DNA_G05	46.4164	784779	18823	3486362	2.07638
LP6008186-DNA_C06	40.6849	783207	18530	3481539	2.07955
LP6008186-DNA_D06	46.2938	791891	25588	3493786	2.07968
LP6008186-DNA_E06	45.0729	782522	24413	3474319	2.07929
LP6008186-DNA_G06	40.4474	781888	20067	3484235	2.08179
LP6008186-DNA_H06	65.4109	802539	19641	3502465	2.07971
LP6008186-DNA_C07	40.3207	775739	20500	3483707	2.0765
LP6008186-DNA_D07	40.0184	774892	20032	3473645	2.07927
LP6008186-DNA_E07	41.3661	777850	21943	3471115	2.07956
LP6008186-DNA_G07	50.6228	792034	18337	3490570	2.07811
LP6008186-DNA_H07	46.3627	790282	19118	3491733	2.0769
LP6008186-DNA_C08	41.0058	776785	20124	3495612	2.07916
LP6008186-DNA_D08	40.709	784893	20339	3499770	2.08011
LP6008186-DNA_E08	41.014	779442	21134	3491146	2.07838
LP6008186-DNA_G08	45.6838	790786	17564	3486552	2.07659
LP6008186-DNA_H08	38.2579	781783	19645	3473250	2.07677
LP6008186-DNA_C09	46.8709	786545	18990	3466552	2.07708
LP6008186-DNA_D09	44.5854	792594	20119	3500813	2.07873
LP6008186-DNA_E09	45.806	791560	22004	3495692	2.07925
LP6008186-DNA_G09	46.2611	797837	19542	3497518	2.07857
LP6008186-DNA_H09	46.6309	788654	20292	3494659	2.07587
LP6008186-DNA_C10	44.2758	794172	20530	3499178	2.07887
LP6008186-DNA_D10	47.4057	798722	17798	3494754	2.07753
LP6008186-DNA_E10	41.8238	789939	18412	3491629	2.07674
LP6008186-DNA_G10	46.644	795468	20321	3483206	2.07957
LP6008186-DNA_H10	45.9419	791221	17900	3474781	2.07782
LP6008186-DNA_C11	50.0721	796988	20489	3502692	2.07944
LP6008186-DNA_D11	49.9302	797679	18662	3500505	2.07487
LP6008186-DNA_E11	69.4066	795546	18519	3480167	2.07746
LP6008186-DNA_G11	48.9308	796907	20019	3494098	2.0779
LP6008186-DNA_H11	47.4316	791293	18671	3469599	2.07657
LP6008186-DNA_C12	39.8207	783520	20841	3506278	2.08039
LP6008186-DNA_D12	46.7589	787469	20595	3507376	2.07668
LP6008186-DNA_E12	41.8285	785111	19152	3478793	2.07845
LP6008186-DNA_G12	44.0147	788167	19319	3497516	2.07655
LP6008186-DNA_H12	44.2418	790765	24266	3498694	2.07637
LP6008187-DNA_D01	42.9158	783981	19366	3469371	2.07816
LP6008187-DNA_E01	37.9226	783486	18952	3489618	2.07731
LP6008187-DNA_F01	46.0561	788987	18415	3484217	2.07844
LP6008187-DNA_G01	46.6307	794849	18214	3483664	2.07705
LP6008187-DNA_H01	45.0709	794927	18964	3490394	2.07767
LP6008187-DNA_D02	39.7499	783905	20827	3480499	2.07615
LP6008187-DNA_E02	39.0391	777450	18187	3472019	2.07831
LP6008187-DNA_F02	42.0203	795317	33266	3521197	2.0798
LP6008187-DNA_G02	42.4179	786468	21286	3490068	2.07814
LP6008187-DNA_H02	41.5176	788487	18847	3508070	2.07987
LP6008187-DNA_D03	49.5072	792787	18882	3478530	2.07768
LP6008187-DNA_E03	47.7803	790826	19010	3477507	2.07885
LP6008187-DNA_F03	49.9977	797099	19351	3497597	2.07757
LP6008187-DNA_G03	45.7925	789569	19418	3492404	2.07775
LP6008187-DNA_D04	46.0491	792209	22111	3491411	2.07742
LP6008187-DNA_E04	40.554	782284	18807	3476074	2.07888
LP6008187-DNA_F04	40.8705	784659	17779	3486542	2.07974
LP6008187-DNA_G04	39.1011	785722	22671	3497996	2.07983
LP6008187-DNA_H04	40.0555	780398	19998	3489067	2.07783
LP6008187-DNA_D05	47.8331	793027	17804	3502458	2.07782
LP6008187-DNA_E05	43.9814	786750	19968	3494448	2.07726
LP6008187-DNA_F05	44.3076	788686	21805	3491592	2.07784
LP6008187-DNA_G05	46.4268	786946	19011	3479501	2.0774
LP6008187-DNA_H05	45.2059	796705	40376	3545616	2.07802
LP6008187-DNA_D06	42.7156	786672	20276	3492079	2.07928
LP6008187-DNA_E06	42.8129	788846	19108	3490164	2.07739
LP6008187-DNA_F06	41.3793	804241	42589	3590228	2.07739
LP6008187-DNA_G06	41.7907	783022	19485	3465207	2.08161
LP6008187-DNA_H06	43.1406	783902	18501	3485011	2.08108
LP6008187-DNA_D07	47.9735	791822	18141	3479473	2.0789
LP6008187-DNA_E07	39.8992	788842	19323	3496146	2.07709
LP6008187-DNA_F07	49.1731	792966	18674	3468629	2.07945
LP6008187-DNA_G07	45.4665	796318	20806	3510508	2.07733
LP6008187-DNA_H07	49.6853	799458	25209	3519579	2.0748
LP6008187-DNA_D08	47.6705	794277	21175	3498581	2.08022
LP6008187-DNA_E08	37.1599	775025	18980	3476791	2.08015
LP6008187-DNA_F08	46.3839	787355	17808	3461997	2.07873
LP6008187-DNA_G08	41.0863	788453	17719	3488426	2.0785
LP6008187-DNA_H08	46.7495	791780	20026	3491361	2.07901
LP6008187-DNA_D09	48.9049	795477	18695	3490736	2.07702
LP6008187-DNA_E09	45.4922	783538	18149	3473907	2.07683
LP6008187-DNA_F09	44.3359	787230	18129	3479275	2.07762
LP6008187-DNA_G09	46.7495	790949	18991	3475699	2.07863
LP6008187-DNA_H09	48.5598	792416	18017	3480175	2.07807
LP6008187-DNA_D10	41.7915	788222	22922	3483930	2.07774
LP6008187-DNA_E10	51.6495	794635	19583	3492609	2.07951
LP6008187-DNA_F10	43.1681	787967	19924	3497878	2.07823
LP6008187-DNA_G10	42.6408	781356	23446	3468610	2.07834
LP6008187-DNA_H10	40.5137	776467	19436	3482455	2.077
LP6008187-DNA_D11	52.2959	796380	19892	3495243	2.07886
LP6008187-DNA_E11	45.8926	786643	19602	3485670	2.07705
LP6008187-DNA_F11	50.5354	794892	18851	3494231	2.07713
LP6008187-DNA_G11	47.7821	788473	17729	3474587	2.07706
LP6008187-DNA_H11	64.587	793185	20212	3474000	2.07739
LP6008187-DNA_B12	48.1777	789444	17881	3483161	2.07729
LP6008187-DNA_D12	44.2706	791310	20498	3506022	2.07932
LP6008187-DNA_E12	43.9889	785144	20269	3486729	2.07919
LP6008187-DNA_F12	43.6721	779393	21111	3475546	2.08136
LP6008187-DNA_G12	40.1081	772247	20001	3463168	2.07877
LP6008188-DNA_A01	43.9149	791369	20280	3515946	2.07874
LP6008188-DNA_B01	39.9842	783153	19844	3500649	2.07919
LP6008188-DNA_C01	38.7145	780354	20046	3492420	2.07748
LP6008188-DNA_F01	46.1105	790410	19454	3487377	2.07798
LP6008188-DNA_G01	42.331	787769	20545	3509278	2.0763
LP6008188-DNA_A02	46.5809	788072	20030	3479254	2.07404
LP6008188-DNA_C02	47.7634	794676	18488	3497097	2.07884
LP6008188-DNA_G02	48.5105	792761	19826	3499865	2.0782
LP6008188-DNA_A03	44.0438	788655	18184	3498475	2.0785
LP6008188-DNA_B03	40.4152	793093	20128	3496864	2.07931
LP6008188-DNA_C03	43.6972	797465	42773	3529139	2.0792
LP6008188-DNA_F03	37.5402	780105	19707	3490095	2.07758
LP6008188-DNA_A04	60.7359	792304	18192	3477780	2.07779
LP6008188-DNA_B04	44.8103	792005	18946	3484512	2.07752
LP6008188-DNA_C04	40.063	781247	20411	3482866	2.08022
LP6008188-DNA_F04	43.4496	780719	20996	3488597	2.08043
LP6008188-DNA_G04	43.656	792004	18005	3485831	2.07673
LP6008188-DNA_A05	44.8055	785251	18321	3499563	2.07568
LP6008188-DNA_B05	38.8392	779853	18791	3482896	2.07732
LP6008188-DNA_C05	46.5515	789817	18869	3497432	2.07916
LP6008188-DNA_F05	42.7315	781332	19350	3478746	2.07933
LP6008188-DNA_G05	43.8016	785392	18597	3488324	2.07571
LP6008188-DNA_A06	43.7692	778406	19271	3468737	2.07724
LP6008188-DNA_B06	41.939	782269	17791	3473228	2.08016
LP6008188-DNA_C06	43.455	786988	19388	3483234	2.07716
LP6008188-DNA_F06	49.1352	798632	20174	3494677	2.08036
LP6008188-DNA_G06	45.0771	798151	25543	3514336	2.07916
LP6008188-DNA_A07	44.8184	785545	26807	3499427	2.07621
LP6008188-DNA_B07	65.1481	797221	23133	3482930	2.07732
LP6008188-DNA_C07	45.6712	797885	20581	3500094	2.07789
LP6008188-DNA_F07	35.3265	773827	20051	3480954	2.08122
LP6008188-DNA_G07	46.8756	799695	18701	3500347	2.07902
LP6008188-DNA_A08	43.2776	791526	18257	3487892	2.0762
LP6008188-DNA_B08	40.9371	786678	19536	3474969	2.07887
LP6008188-DNA_C08	43.4147	786885	21308	3485867	2.0777
LP6008188-DNA_F08	48.0814	787528	19835	3478230	2.07873
LP6008188-DNA_G08	42.4011	789871	20468	3497735	2.07846
LP6008188-DNA_A09	45.9577	789461	19724	3485875	2.07737
LP6008188-DNA_B09	43.866	790409	19065	3496583	2.08098
LP6008188-DNA_C09	38.3289	772688	19983	3479056	2.07496
LP6008188-DNA_F09	43.9424	781837	19499	3463854	2.07998
LP6008188-DNA_G09	42.3162	783984	22110	3487321	2.07874
LP6008188-DNA_A10	47.944	796923	19111	3486393	2.07933
LP6008188-DNA_B10	44.7448	792984	19796	3488478	2.07727
LP6008188-DNA_C10	41.8727	783386	19399	3492643	2.08097
LP6008188-DNA_F10	41.5733	775077	19460	3475317	2.07534
LP6008188-DNA_G10	46.7322	792472	20693	3474812	2.07957
LP6008188-DNA_A11	51.6833	794236	18885	3497686	2.07789
LP6008188-DNA_B11	39.3059	773059	19636	3466093	2.07945
LP6008188-DNA_C11	42.7641	797286	18961	3510295	2.07765
LP6008188-DNA_F11	46.3594	800441	20343	3503678	2.08012
LP6008188-DNA_G11	48.1943	794857	18466	3488533	2.07836
LP6008188-DNA_B12	47.7009	792957	18947	3477655	2.07816
LP6008188-DNA_C12	49.8402	798582	18217	3492585	2.07918
LP6008188-DNA_F12	46.2623	798182	18774	3492535	2.07866
LP6008188-DNA_G12	42.1119	839270	47172	3736459	2.07737
LP6008189-DNA_A01	46.0747	790448	20705	3492586	2.07811
LP6008189-DNA_B01	45.1611	783599	18274	3473891	2.07888
LP6008189-DNA_D01	67.3107	794202	19961	3485023	2.08292
LP6008189-DNA_F01	46.7096	792985	18649	3492985	2.07566
LP6008189-DNA_H01	45.9705	808917	39569	3550056	2.07679
LP6008189-DNA_A02	47.4864	796001	17500	3470512	2.0797
LP6008189-DNA_B02	48.7559	788092	18782	3465160	2.07994
LP6008189-DNA_D02	46.6324	793052	17877	3491027	2.07667
LP6008189-DNA_F02	44.9274	786890	18537	3471458	2.07731
LP6008189-DNA_H02	44.4861	788828	20055	3480448	2.07888
LP6008189-DNA_A03	50.8622	793039	18774	3474176	2.07868
LP6008189-DNA_B03	43.7117	787903	18809	3483323	2.07675
LP6008189-DNA_D03	45.411	791911	20601	3487852	2.07798
LP6008189-DNA_F03	45.1894	793585	18236	3478628	2.07886
LP6008189-DNA_H03	70.0659	801348	19898	3483942	2.07768
LP6008189-DNA_A04	43.8263	787839	19014	3490952	2.07979
LP6008189-DNA_B04	43.0439	792268	23626	3506734	2.07936
LP6008189-DNA_D04	45.9161	793707	18894	3487325	2.07568
LP6008189-DNA_F04	45.7609	797071	21678	3510226	2.07686
LP6008189-DNA_H04	46.6901	798482	18580	3501649	2.07438
LP6008189-DNA_A05	47.2323	788720	19022	3480399	2.07722
LP6008189-DNA_B05	45.2542	792523	19025	3492611	2.07994
LP6008189-DNA_D05	45.2608	790959	19124	3492844	2.07929
LP6008189-DNA_F05	46.7489	781601	19361	3468916	2.07656
LP6008189-DNA_H05	40.6405	790895	21580	3501403	2.07942
LP6008189-DNA_A06	43.5299	786662	18843	3493278	2.07731
LP6008189-DNA_B06	50.8962	792423	22278	3486686	2.07812
LP6008189-DNA_D06	48.0498	790176	18629	3473447	2.07953
LP6008189-DNA_F06	42.3422	783034	18535	3473099	2.08058
LP6008189-DNA_H06	45.8279	788748	17963	3469232	2.07954
LP6008189-DNA_A07	47.213	805471	26380	3534837	2.08067
LP6008189-DNA_B07	45.0838	792224	27983	3494874	2.07678
LP6008189-DNA_D07	44.4425	792684	19140	3487137	2.07873
LP6008189-DNA_F07	45.8023	795156	20221	3495305	2.07887
LP6008189-DNA_H07	39.9569	787472	18535	3482094	2.07842
LP6008189-DNA_A08	44.3396	792821	20133	3487575	2.0791
LP6008189-DNA_B08	36.8666	781603	18606	3493069	2.08054
LP6008189-DNA_D08	45.2329	794824	20341	3496323	2.07897
LP6008189-DNA_F08	39.2857	786389	20255	3506858	2.07751
LP6008189-DNA_H08	41.5284	790765	22870	3509902	2.07729
LP6008189-DNA_A09	43.3557	806629	54147	3549664	2.07776
LP6008189-DNA_B09	43.1832	777499	19318	3448797	2.08183
LP6008189-DNA_D09	42.5078	785668	21863	3476253	2.08097
LP6008189-DNA_F09	42.2419	783083	22044	3487679	2.07786
LP6008189-DNA_H09	41.1448	780034	19192	3484803	2.08122
LP6008189-DNA_A10	66.8382	798876	19896	3479062	2.07723
LP6008189-DNA_D10	49.7735	788698	22731	3472836	2.07827
LP6008189-DNA_F10	41.7085	793636	22483	3512564	2.07875
LP6008189-DNA_H10	47.6283	796988	19179	3500408	2.07608
LP6008189-DNA_A11	44.4245	795109	17738	3494612	2.07547
LP6008189-DNA_B11	49.2171	790230	19980	3456277	2.07806
LP6008189-DNA_D11	47.8586	792726	18797	3489553	2.0758
LP6008189-DNA_F11	46.1936	796627	20796	3493670	2.07595
LP6008189-DNA_H11	46.5079	795961	18561	3484384	2.07671
LP6008189-DNA_A12	42.9926	790871	25362	3481304	2.07546
LP6008189-DNA_B12	48.3423	799935	19518	3500310	2.07868
LP6008189-DNA_D12	46.9379	789607	19026	3463280	2.0823
LP6008189-DNA_H12	43.529	786518	20727	3479953	2.07789
LP6008190-DNA_B01	47.7735	793505	17852	3476058	2.07793
LP6008190-DNA_C01	46.8159	795463	19668	3488641	2.07743
LP6008190-DNA_D01	40.9222	786026	19323	3483997	2.07413
LP6008190-DNA_E01	43.2752	789565	17943	3490937	2.07909
LP6008190-DNA_F01	46.5226	790633	19211	3477733	2.07678
LP6008190-DNA_B02	44.5372	787674	18659	3476418	2.07811
LP6008190-DNA_C02	45.6433	790634	19189	3479967	2.07997
LP6008190-DNA_D02	43.3783	790789	25014	3493312	2.07843
LP6008190-DNA_E02	44.6352	794475	20493	3498350	2.07792
LP6008190-DNA_F02	43.4868	788959	18850	3484039	2.07987
LP6008190-DNA_B03	45.3461	795450	20847	3479435	2.07632
LP6008190-DNA_C03	46.1142	791886	19183	3474328	2.07971
LP6008190-DNA_D03	48.1367	796318	20931	3490650	2.07846
LP6008190-DNA_E03	43.4614	777968	18261	3477728	2.07863
LP6008190-DNA_F03	46.7433	794550	18497	3495069	2.08043
LP6008190-DNA_B04	48.167	803332	22140	3507816	2.07826
LP6008190-DNA_E04	37.8557	784386	17774	3486935	2.07763
LP6008190-DNA_F04	45.9665	788864	19096	3468291	2.07829
LP6008190-DNA_D05	44.9209	795150	18392	3493379	2.07581
LP6008190-DNA_E05	35.0797	767827	18380	3478713	2.08008
LP6008190-DNA_F05	57.7087	792321	19157	3479031	2.07977
LP6008190-DNA_C06	42.4393	783490	20348	3476686	2.07781
LP6008190-DNA_D06	40.1244	781016	20344	3494327	2.07648
LP6008190-DNA_E06	43.688	791596	18988	3474471	2.07953
LP6008190-DNA_F06	41.8676	778989	18852	3459125	2.07762
LP6008190-DNA_B07	51.9479	797470	21464	3492072	2.07612
LP6008190-DNA_C07	50.937	802144	19116	3510579	2.07739
LP6008190-DNA_D07	53.4254	797273	21041	3496274	2.07659
LP6008190-DNA_E07	48.7984	795513	19439	3485228	2.07895
LP6008190-DNA_F07	50.5448	803389	19739	3505783	2.07728
LP6008190-DNA_B08	46.4293	793554	18317	3474340	2.07873
LP6008190-DNA_C08	47.1458	800366	19385	3491854	2.08154
LP6008190-DNA_D08	45.6161	792082	19349	3491336	2.07833
LP6008190-DNA_E08	44.0763	783110	19268	3480125	2.07944
LP6008190-DNA_F08	45.7346	783401	20202	3484005	2.07726
LP6008190-DNA_B09	44.5015	793800	17769	3477268	2.07747
LP6008190-DNA_C09	46.0936	791343	19596	3495754	2.07689
LP6008190-DNA_D09	43.621	788381	18276	3490192	2.07882
LP6008190-DNA_E09	42.0032	788990	18413	3478249	2.07863
LP6008190-DNA_F09	46.2558	793485	18507	3481774	2.07518
LP6008190-DNA_B10	49.5551	800698	19070	3500886	2.07481
LP6008190-DNA_C10	50.3496	796126	17990	3476192	2.07955
LP6008190-DNA_D10	42.7091	790210	19585	3503149	2.07766
LP6008190-DNA_E10	44.4391	776617	20467	3496432	2.07924
LP6008190-DNA_F10	46.152	788294	20263	3489441	2.07776
LP6008190-DNA_B11	39.1222	783066	20887	3477871	2.07816
LP6008190-DNA_C11	42.1799	780794	19530	3475134	2.07901
LP6008190-DNA_D11	36.9247	778791	24407	3492464	2.07961
LP6008190-DNA_E11	43.0747	784886	19407	3473455	2.07891
LP6008190-DNA_F11	45.5588	789451	20637	3480078	2.07976
LP6008190-DNA_B12	46.0705	792454	18524	3496337	2.07659
LP6008190-DNA_C12	47.3408	790407	19214	3487640	2.07711
LP6008190-DNA_D12	43.611	779835	18832	3471240	2.08056
LP6008190-DNA_E12	52.8847	788638	22464	3476150	2.07855
LP6008190-DNA_F12	45.9841	788571	18401	3499085	2.07769
LP6008191-DNA_A01	44.4944	792808	20389	3502892	2.07689
LP6008191-DNA_B01	42.0599	785713	19611	3495508	2.07804
LP6008191-DNA_F01	49.6946	794386	19328	3476335	2.07813
LP6008191-DNA_G01	40.7309	780728	21935	3503050	2.07815
LP6008191-DNA_H01	44.7487	788775	18555	3479165	2.07896
LP6008191-DNA_A02	43.2836	784086	18273	3475281	2.07896
LP6008191-DNA_B02	44.3762	788936	18349	3483267	2.07599
LP6008191-DNA_G02	45.4084	789056	17637	3491261	2.07888
LP6008191-DNA_H02	46.5273	791862	18407	3493330	2.07899
LP6008191-DNA_A03	48.63	786373	18289	3468231	2.07798
LP6008191-DNA_B03	47.8608	790319	18274	3481433	2.07765
LP6008191-DNA_F03	48.4185	790440	17887	3485438	2.07572
LP6008191-DNA_G03	41.7281	795126	25593	3537320	2.07868
LP6008191-DNA_H03	40.7685	783774	18097	3475257	2.07664
LP6008191-DNA_A04	45.0427	784241	15914	3471643	2.08035
LP6008191-DNA_B04	43.8523	783276	19769	3469126	2.07657
LP6008191-DNA_F04	44.5638	792216	20239	3499632	2.07979
LP6008191-DNA_G04	42.3179	786039	20296	3485712	2.07894
LP6008191-DNA_H04	42.7889	788984	22380	3486185	2.07534
LP6008191-DNA_A05	43.9291	783116	20939	3478077	2.07726
LP6008191-DNA_B05	42.859	786310	19464	3491006	2.0791
LP6008191-DNA_F05	42.8785	781526	18921	3477251	2.07868
LP6008191-DNA_G05	42.1919	783150	20475	3490997	2.07823
LP6008191-DNA_H05	49.8304	802345	20192	3500074	2.07961
LP6008191-DNA_A06	48.3287	797803	18477	3491145	2.07967
LP6008191-DNA_B06	46.3377	791592	18308	3477294	2.07915
LP6008191-DNA_F06	45.9691	795607	20338	3499843	2.07736
LP6008191-DNA_G06	46.3816	797090	19168	3495880	2.07836
LP6008191-DNA_H06	48.2642	795338	18876	3491173	2.07735
LP6008191-DNA_A07	44.4157	792893	18407	3475047	2.08135
LP6008191-DNA_B07	49.4562	794302	19837	3489121	2.07736
LP6008191-DNA_F07	47.7435	797090	19549	3503321	2.07857
LP6008191-DNA_G07	49.4998	795497	19658	3494319	2.08031
LP6008191-DNA_H07	54.523	793672	18814	3480065	2.07735
LP6008191-DNA_A08	47.5859	796516	18285	3488276	2.07608
LP6008191-DNA_B08	49.2138	799111	19757	3492030	2.07794
LP6008191-DNA_F08	46.7819	800823	19057	3509035	2.07768
LP6008191-DNA_G08	37.4001	783982	18616	3472381	2.07747
LP6008191-DNA_A09	46.2048	785692	17545	3481154	2.07867
LP6008191-DNA_B09	46.1114	793923	17960	3494514	2.07831
LP6008191-DNA_F09	59.5493	791185	17941	3465665	2.07983
LP6008191-DNA_G09	43.4341	784138	18852	3478087	2.0808
LP6008191-DNA_H09	42.9194	781922	19527	3481202	2.07569
LP6008191-DNA_A10	56.3243	792325	18623	3484298	2.07874
LP6008191-DNA_B10	40.7041	775786	20974	3505879	2.07639
LP6008191-DNA_F10	41.219	777843	19194	3477972	2.07914
LP6008191-DNA_G10	43.1812	792357	26739	3507313	2.0779
LP6008191-DNA_H10	44.5377	787516	19486	3493258	2.07639
LP6008191-DNA_A11	44.2758	793073	20631	3498235	2.08065
LP6008191-DNA_B11	37.9836	779235	18672	3478297	2.07975
LP6008191-DNA_F11	46.3268	789332	19731	3484427	2.07902
LP6008191-DNA_G11	38.8693	785612	18974	3481313	2.07605
LP6008191-DNA_H11	45.3601	791902	19124	3496552	2.07864
LP6008191-DNA_A12	61.868	793420	17964	3467351	2.07733
LP6008191-DNA_F12	41.2914	776808	19315	3480570	2.07642
LP6008191-DNA_G12	44.2074	786270	18803	3492302	2.07968
LP6008191-DNA_H12	37.9642	774271	19878	3482536	2.07785
LP6008192-DNA_A01	59.5414	797570	21073	3497633	2.07859
LP6008192-DNA_C01	46.5138	793169	19526	3475453	2.08224
LP6008192-DNA_D01	40.8581	789325	26142	3503553	2.07801
LP6008192-DNA_E01	46.5753	791321	19341	3493822	2.07832
LP6008192-DNA_H01	47.4304	793009	18597	3488527	2.07742
LP6008192-DNA_A02	44.7425	778871	20007	3481084	2.08059
LP6008192-DNA_C02	40.8811	786522	17970	3482519	2.08202
LP6008192-DNA_D02	48.7234	795185	17765	3481100	2.0788
LP6008192-DNA_E02	41.7494	788234	20519	3499914	2.08238
LP6008192-DNA_H02	47.1933	789881	19204	3491991	2.07813
LP6008192-DNA_A03	48.3489	791216	18986	3484661	2.07755
LP6008192-DNA_C03	48.1145	797726	18951	3486936	2.07841
LP6008192-DNA_D03	39.47	783303	19895	3503503	2.08058
LP6008192-DNA_E03	39.2368	787875	19714	3485461	2.07992
LP6008192-DNA_H03	46.2572	796340	17634	3502297	2.07735
LP6008192-DNA_A04	48.3992	791966	19426	3466363	2.07983
LP6008192-DNA_C04	47.0378	791489	18657	3488480	2.07416
LP6008192-DNA_D04	47.1117	788993	22259	3498731	2.08137
LP6008192-DNA_E04	42.4957	786297	19137	3479319	2.07814
LP6008192-DNA_H04	43.5019	792953	19905	3504161	2.07853
LP6008192-DNA_A05	46.1525	795141	17681	3491842	2.07464
LP6008192-DNA_C05	45.5312	793315	18851	3489964	2.0777
LP6008192-DNA_D05	46.6141	791362	20108	3490789	2.07996
LP6008192-DNA_E05	43.0486	778613	19460	3501357	2.08099
LP6008192-DNA_H05	45.4565	789345	19321	3511815	2.07742
LP6008192-DNA_A06	47.802	793173	19154	3486283	2.07743
LP6008192-DNA_C06	42.0912	778449	19230	3473057	2.0792
LP6008192-DNA_D06	43.7747	791583	18914	3499289	2.08026
LP6008192-DNA_E06	46.2533	787233	19084	3480235	2.07758
LP6008192-DNA_H06	50.3321	791804	18507	3476115	2.07813
LP6008192-DNA_A07	49.4041	796920	19293	3507031	2.07829
LP6008192-DNA_C07	48.676	789564	21155	3473003	2.07942
LP6008192-DNA_D07	40.6713	780465	19639	3497652	2.07758
LP6008192-DNA_E07	45.228	787733	19231	3485752	2.07749
LP6008192-DNA_H07	41.4383	786010	18878	3488304	2.0789
LP6008192-DNA_A08	37.546	784672	22907	3497445	2.07823
LP6008192-DNA_C08	45.0618	785524	18901	3474359	2.0786
LP6008192-DNA_D08	40.194	782415	18994	3476380	2.07838
LP6008192-DNA_E08	46.062	788970	20389	3491365	2.08058
LP6008192-DNA_H08	49.8067	798233	22397	3492275	2.07692
LP6008192-DNA_A09	46.9439	793775	19797	3495688	2.07792
LP6008192-DNA_C09	48.4229	793947	20989	3485915	2.07881
LP6008192-DNA_E09	50.4966	798599	20019	3494843	2.07701
LP6008192-DNA_H09	45.9636	794727	18612	3491762	2.07756
LP6008192-DNA_A10	48.6859	792586	18311	3484943	2.07896
LP6008192-DNA_C10	48.3775	791318	18280	3468493	2.07691
LP6008192-DNA_D10	43.7095	786438	18934	3482293	2.07796
LP6008192-DNA_E10	45.4539	787569	17858	3497089	2.0785
LP6008192-DNA_H10	48.4626	796633	18724	3484103	2.07842
LP6008192-DNA_A11	44.3721	796349	19526	3514803	2.07763
LP6008192-DNA_C11	50.28	795021	19898	3488095	2.07807
LP6008192-DNA_D11	46.2157	790586	21380	3482229	2.07474
LP6008192-DNA_E11	48.684	788057	18635	3478125	2.07835
LP6008192-DNA_H11	49.6298	799888	18378	3492873	2.07644
LP6008192-DNA_A12	49.2259	791398	19955	3475882	2.08265
LP6008192-DNA_C12	47.1956	799009	18895	3497780	2.07546
LP6008192-DNA_D12	36.3597	786150	18524	3501041	2.07945
LP6008192-DNA_E12	50.9575	795740	19267	3481502	2.0776
LP6008192-DNA_G12	48.9011	790266	19779	3478055	2.07951
LP6008192-DNA_H12	46.9686	799931	18330	3505714	2.07824
LP6008193-DNA_A01	49.3364	789035	17794	3478157	2.07797
LP6008193-DNA_B01	42.4314	776347	18786	3475965	2.07967
LP6008193-DNA_C01	43.4333	783792	18245	3487906	2.07748
LP6008193-DNA_F01	42.8952	787880	20069	3492554	2.07801
LP6008193-DNA_H01	47.126	793626	18141	3477759	2.07829
LP6008193-DNA_A02	46.596	791803	20421	3484819	2.07682
LP6008193-DNA_B02	46.3323	797067	19841	3505021	2.07685
LP6008193-DNA_C02	43.3152	793633	20921	3492412	2.07894
LP6008193-DNA_F02	42.1617	788994	22800	3503497	2.07692
LP6008193-DNA_G02	45.063	789917	19065	3486220	2.07785
LP6008193-DNA_H02	42.9846	779302	18380	3476901	2.07985
LP6008193-DNA_A03	43.5536	784976	19596	3494164	2.07944
LP6008193-DNA_B03	44.1731	787321	19728	3494197	2.07758
LP6008193-DNA_C03	42.9731	789446	18681	3492613	2.07929
LP6008193-DNA_F03	42.6401	784450	20144	3492436	2.07613
LP6008193-DNA_G03	43.8289	785341	19295	3467211	2.07788
LP6008193-DNA_H03	43.7265	788614	20935	3492887	2.08092
LP6008193-DNA_A04	44.1212	787250	18144	3493446	2.07905
LP6008193-DNA_B04	37.9583	781862	20402	3484232	2.07974
LP6008193-DNA_C04	42.7834	829237	45439	3664059	2.08105
LP6008193-DNA_G04	43.3824	813632	58229	3567693	2.07606
LP6008193-DNA_H04	44.6524	788459	18792	3484470	2.07852
LP6008193-DNA_A05	43.2179	793827	20626	3480834	2.08088
LP6008193-DNA_B05	45.9368	792229	18785	3486186	2.07817
LP6008193-DNA_C05	43.0494	787918	18515	3496270	2.07957
LP6008193-DNA_F05	40.3228	783314	19281	3479953	2.07684
LP6008193-DNA_G05	45.4022	784981	20038	3475079	2.07634
LP6008193-DNA_H05	40.8367	782593	19195	3487161	2.07868
LP6008113-DNA_A01	49.2076	790973	20686	3477617	2.07804
LP6008113-DNA_D01	50.4666	795361	20567	3480211	2.07702
LP6008113-DNA_E01	49.4286	795704	20454	3469031	2.077
LP6008113-DNA_G01	47.7335	796730	20594	3481704	2.07755
LP6008113-DNA_H01	44.8094	786597	21182	3478496	2.07826
LP6008113-DNA_A02	47.1159	789971	21401	3504530	2.07902
LP6008113-DNA_E02	46.1027	785717	20218	3482557	2.07783
LP6008113-DNA_G02	48.6745	792993	20151	3482093	2.07698
LP6008113-DNA_H02	45.4035	787760	21003	3491658	2.07898
LP6008113-DNA_D03	49.9096	794002	20548	3481858	2.07804
LP6008113-DNA_E03	45.9977	786629	19979	3484361	2.07673
LP6008113-DNA_G03	49.4194	792083	20418	3476716	2.07937
LP6008113-DNA_H03	47.6981	786050	20596	3470811	2.07719
LP6008113-DNA_D04	49.1703	795039	21036	3487007	2.07885
LP6008113-DNA_E04	50.8534	797804	20598	3504417	2.07814
LP6008113-DNA_G04	46.8139	790150	20676	3493515	2.07955
LP6008113-DNA_H04	45.1614	788517	20511	3485721	2.07956
LP6008113-DNA_A05	48.3446	796687	21333	3491224	2.07801
LP6008113-DNA_B05	50.4662	802439	20895	3493551	2.0801
LP6008113-DNA_E05	48.6236	799693	20997	3492073	2.0782
LP6008113-DNA_G05	49.4634	787659	20462	3466030	2.07549
LP6008113-DNA_H05	47.5046	795904	20941	3488669	2.07636
LP6008113-DNA_A06	47.5507	797479	20607	3495135	2.07713
LP6008113-DNA_B06	45.5551	795974	21603	3486715	2.0781
LP6008113-DNA_D06	46.5529	792414	21066	3478211	2.07398
LP6008113-DNA_E06	45.0152	792029	20540	3483865	2.07633
LP6008113-DNA_G06	45.9974	794848	20662	3489642	2.0792
LP6008113-DNA_H06	45.9441	794031	20928	3500759	2.07687
LP6008113-DNA_A07	45.6654	791123	20805	3476381	2.07643
LP6008113-DNA_G07	44.1128	785872	21013	3485282	2.07746
LP6008113-DNA_H07	43.7905	784950	20697	3486975	2.07458
LP6008113-DNA_A08	42.7261	777673	20983	3470003	2.07895
LP6008113-DNA_D08	44.2547	782248	21189	3466436	2.07675
LP6008113-DNA_E08	48.5758	800996	20594	3483078	2.0786
LP6008113-DNA_G08	46.8684	792941	20950	3477698	2.07714
LP6008113-DNA_H08	46.3883	791921	20426	3463079	2.07613
LP6008113-DNA_A09	48.5319	797762	21012	3488182	2.07783
LP6008113-DNA_B09	46.1643	794231	20830	3492139	2.07869
LP6008113-DNA_D09	47.2305	784647	20448	3481220	2.07766
LP6008113-DNA_E09	45.769	792055	20871	3473486	2.08033
LP6008113-DNA_G09	43.8627	792912	21207	3507033	2.07975
LP6008113-DNA_H09	50.1298	800827	20285	3496056	2.07837
LP6008113-DNA_A10	49.6751	792049	21082	3459654	2.07664
LP6008113-DNA_B10	51.531	796559	20548	3477624	2.07824
LP6008113-DNA_D10	49.3319	794913	20449	3480033	2.07756
LP6008113-DNA_E10	49.9471	793744	20055	3478055	2.07778
LP6008113-DNA_G10	48.4247	802703	20502	3499920	2.07798
LP6008113-DNA_H10	46.9788	794745	20837	3479803	2.07904
LP6008113-DNA_A11	51.5386	795928	20764	3493558	2.07484
LP6008113-DNA_B11	43.066	779775	20673	3480406	2.07736
LP6008113-DNA_D11	49.6979	795301	20897	3463247	2.07814
LP6008113-DNA_E11	50.0557	792708	21017	3482256	2.07824
LP6008113-DNA_G11	48.7179	792606	20753	3476665	2.08106
LP6008113-DNA_H11	64.9447	793865	13598	3483663	2.07851
LP6008113-DNA_A12	48.6533	800122	21035	3491383	2.07806
LP6008113-DNA_B12	45.9985	796424	20857	3492417	2.07932
LP6008113-DNA_D12	47.8107	790232	20902	3486130	2.08005
LP6008113-DNA_E12	46.945	792968	20968	3484802	2.07699
LP6008113-DNA_G12	47.3341	793686	20251	3475823	2.07886
LP6008113-DNA_H12	49.1503	793020	19856	3471251	2.07915
LP6008114-DNA_B01	43.5704	788574	20761	3494312	2.07589
LP6008114-DNA_C01	44.0465	788294	20876	3487484	2.07839
LP6008114-DNA_E01	44.4938	787608	20886	3486178	2.0802
LP6008114-DNA_F01	44.2903	787918	21194	3488189	2.07871
LP6008114-DNA_H01	43.2896	775266	21033	3491195	2.07874
LP6008114-DNA_B02	42.5738	783589	21090	3483803	2.07899
LP6008114-DNA_C02	43.1094	777165	21193	3455755	2.07946
LP6008114-DNA_E02	42.2995	785005	21198	3487892	2.0791
LP6008114-DNA_F02	42.0658	772471	20769	3476096	2.07925
LP6008114-DNA_H02	43.5151	784135	20914	3481757	2.07618
LP6008114-DNA_B03	49.609	793643	20560	3484537	2.07827
LP6008114-DNA_C03	50.127	792401	20513	3475099	2.07815
LP6008114-DNA_E03	50.2664	796884	20602	3494227	2.07906
LP6008114-DNA_H03	50.3657	789903	20730	3488563	2.07793
LP6008114-DNA_B04	48.7307	791362	21351	3491098	2.07857
LP6008114-DNA_C04	49.6937	796300	20404	3495539	2.07886
LP6008114-DNA_E04	51.6567	795376	20437	3491904	2.07832
LP6008114-DNA_F04	47.292	795382	20768	3489947	2.07792
LP6008114-DNA_H04	49.0136	797263	21449	3497043	2.0791
LP6008114-DNA_B05	48.5218	800495	20911	3499366	2.07714
LP6008114-DNA_C05	45.3649	791334	21084	3483234	2.07554
LP6008114-DNA_E05	47.5593	796220	20951	3489351	2.07821
LP6008114-DNA_F05	48.3016	797725	21335	3492507	2.07931
LP6008114-DNA_H05	45.1084	783956	21318	3475400	2.07728
LP6008114-DNA_B06	51.2376	800062	20492	3493392	2.07575
LP6008114-DNA_C06	49.8367	799226	20711	3477316	2.07896
LP6008114-DNA_E06	48.84	791740	20234	3463373	2.07682
LP6008114-DNA_F06	48.3614	800197	20943	3503801	2.07851
LP6008114-DNA_H06	49.3468	795176	20890	3486235	2.07982
LP6008114-DNA_B07	44.6399	782891	21582	3483246	2.07877
LP6008114-DNA_C07	47.2483	798500	20812	3492310	2.07746
LP6008114-DNA_E07	47.5193	799794	21743	3508242	2.07729
LP6008114-DNA_F07	45.3723	784874	20155	3484107	2.08019
LP6008114-DNA_H07	67.0538	797614	21052	3498031	2.0781
LP6008114-DNA_B08	45.019	787250	21054	3481585	2.07767
LP6008114-DNA_C08	47.5086	792821	20255	3492779	2.0755
LP6008114-DNA_E08	44.5553	794740	22021	3499308	2.07874
LP6008114-DNA_F08	43.8614	788068	20753	3475488	2.07834
LP6008114-DNA_H08	44.1918	785440	20823	3498030	2.07436
LP6008114-DNA_B09	46.7862	787661	21411	3494171	2.07815
LP6008114-DNA_C09	43.8355	788976	21113	3491455	2.07586
LP6008114-DNA_F09	47.2638	791793	20678	3481431	2.07991
LP6008114-DNA_H09	48.4202	794007	21244	3483739	2.08108
LP6008114-DNA_C10	47.0963	793287	20634	3486325	2.07917
LP6008114-DNA_E10	48.3921	796758	20934	3496255	2.07959
LP6008114-DNA_F10	44.9429	793836	20520	3488468	2.07802
LP6008114-DNA_H10	47.7618	791449	20954	3486429	2.07799
LP6008114-DNA_B11	43.4304	789149	20688	3492327	2.07754
LP6008114-DNA_C11	67.2504	801137	20789	3491543	2.07913
LP6008114-DNA_E11	47.178	790052	20554	3481290	2.07621
LP6008114-DNA_F11	47.9355	793198	20323	3485402	2.07884
LP6008114-DNA_H11	48.0751	794243	20707	3498719	2.0774
LP6008114-DNA_B12	47.4707	787341	20969	3468238	2.07536
LP6008114-DNA_C12	46.3795	788133	20582	3476320	2.07848
LP6008114-DNA_E12	43.6855	788356	20858	3490661	2.07871
LP6008114-DNA_F12	44.2904	787530	20524	3485468	2.07764
LP6008114-DNA_H12	46.8945	794054	20987	3486960	2.07856
LP6008115-DNA_A01	46.2523	796448	20831	3496247	2.07968
LP6008115-DNA_C01	45.8082	796467	21113	3489710	2.07723
LP6008115-DNA_D01	44.8822	789938	21073	3487639	2.07769
LP6008115-DNA_F01	45.4433	793604	20849	3486712	2.07919
LP6008115-DNA_G01	46.417	790391	20015	3485181	2.07792
LP6008115-DNA_A02	46.5639	791272	21055	3483110	2.07934
LP6008115-DNA_C02	44.3164	791953	22213	3486448	2.07723
LP6008115-DNA_D02	43.7965	791359	20945	3497553	2.07917
LP6008115-DNA_F02	51.1609	801485	20495	3484200	2.07606
LP6008115-DNA_G02	50.1973	802551	20912	3496441	2.07789
LP6008115-DNA_A03	50.0011	793707	20518	3463343	2.07707
LP6008115-DNA_C03	45.9099	792497	21938	3514900	2.08105
LP6008115-DNA_D03	46.7117	785832	20965	3495633	2.07934
LP6008115-DNA_F03	46.8786	786184	20700	3494428	2.07937
LP6008115-DNA_G03	43.219	781632	21102	3490353	2.0819
LP6008115-DNA_A04	43.1727	782914	21235	3488384	2.07568
LP6008115-DNA_C04	47.1306	782781	20851	3479639	2.07746
LP6008115-DNA_D04	49.9911	792399	20298	3492918	2.0774
LP6008115-DNA_G04	50.4113	794552	19813	3481913	2.0763
LP6008115-DNA_A05	48.1485	788795	20733	3494381	2.07817
LP6008115-DNA_C05	49.9677	795351	21088	3493976	2.08068
LP6008115-DNA_D05	52.4967	787500	20928	3479704	2.07767
LP6008115-DNA_G05	42.1181	790847	20561	3486936	2.07758
LP6008115-DNA_A06	47.5717	794267	20356	3483571	2.07387
LP6008115-DNA_C06	49.4724	798239	20618	3491822	2.07676
LP6008115-DNA_D06	51.521	785804	20915	3476925	2.07829
LP6008115-DNA_F06	44.2115	790164	20298	3471964	2.07808
LP6008115-DNA_G06	45.813	794662	21249	3492914	2.07927
LP6008115-DNA_A07	45.9014	792999	20304	3480242	2.07763
LP6008115-DNA_C07	43.8003	790216	21538	3498617	2.07869
LP6008115-DNA_D07	45.6583	787678	20973	3487816	2.07757
LP6008115-DNA_F07	44.9168	789451	21283	3503309	2.07756
LP6008115-DNA_G07	45.4851	786861	20443	3490203	2.07598
LP6008115-DNA_A08	43.6399	783484	21353	3480882	2.07603
LP6008115-DNA_C08	45.3251	786468	21048	3473811	2.07931
LP6008115-DNA_D08	47.7076	799463	20824	3497174	2.07978
LP6008115-DNA_F08	56.5463	786883	20929	3473849	2.0765
LP6008115-DNA_G08	50.6911	799578	20523	3483471	2.081
LP6008115-DNA_A09	48.9455	798654	20783	3486414	2.07876
LP6008115-DNA_C09	50.3667	800133	21192	3495706	2.07886
LP6008115-DNA_D09	45.3202	784637	20918	3492149	2.0773
LP6008115-DNA_F09	49.2899	793816	20711	3484066	2.08011
LP6008115-DNA_G09	48.2925	791999	20927	3479170	2.07872
LP6008115-DNA_A10	39.1183	790510	20907	3516847	2.07722
LP6008115-DNA_C10	49.2364	794195	20353	3491639	2.07905
LP6008115-DNA_D10	43.913	793385	21205	3497268	2.07699
LP6008115-DNA_F10	43.1524	768828	21101	3488574	2.07719
LP6008115-DNA_G10	47.5746	793173	21273	3481427	2.0752
LP6008115-DNA_A11	49.614	793438	20077	3487165	2.07766
LP6008115-DNA_C11	50.2665	789808	20571	3461505	2.07646
LP6008115-DNA_D11	49.2693	796160	20437	3488992	2.08103
LP6008115-DNA_F11	48.4934	795252	20363	3477312	2.07667
LP6008115-DNA_G11	47.9726	790298	20872	3465640	2.07745
LP6008115-DNA_A12	45.4565	788461	20493	3473507	2.07766
LP6008115-DNA_C12	45.7744	790127	20794	3475717	2.07677
LP6008115-DNA_D12	49.5623	798059	20446	3479759	2.07522
LP6008115-DNA_F12	51.7804	801727	20418	3482699	2.07667
LP6008115-DNA_G12	50.3778	802851	20732	3496523	2.07674
LP6008116-DNA_A01	46.4866	789740	21781	3502642	2.07935
LP6008116-DNA_B01	45.2285	783366	20835	3477812	2.07773
LP6008116-DNA_G01	48.8422	798527	20623	3483490	2.07709
LP6008116-DNA_A02	51.5793	794817	20601	3469238	2.07958
LP6008116-DNA_B02	44.6322	783320	20486	3494200	2.07911
LP6008116-DNA_D02	48.6687	804347	20889	3500101	2.07707
LP6008116-DNA_E02	44.6816	796341	21655	3489950	2.07629
LP6008116-DNA_G02	49.3472	800445	20449	3490549	2.07376
[truncated: 1,002 more rows]
