# Supplementary material for: Detection of long repeat expansions from PCR-free whole-genome sequence data
Source: Genome Res. 2017 Nov;27(11):1895–903. doi: 10.1101/gr.225672.117 (PMC5668946; doi:10.1101/gr.225672.117)
Supplement: Supplemental Material [file supp_gr.225672.117_Supplemental_Table_7.xlsx]

## Sheet: coriell_sup_table
Sample ID	Disease	Gene	Repeat Status	Sex	Median depth	Read length	Experimental size	Mutations	Source	Comments
NA06075	DM1	DMPK	Expansion	Male	37.8913103558857	150	66	(CTG)n EXPANSION	Illumina	Clinical status unknown; droopy eyelids; stiff when cold; cardiac arrhythmia; donor subject has one normal CTG repeat allele and one allele with a CTG repeat size of 66 in the DMPK gene; affected daughter is GM04608; two affected granddaughters are GM04601 and GM06077; EMG exam was normal; see GM06076 fibroblast
NA04567	DM1	DMPK	Expansion	Female	45.3836370949791	150	700	(CTG)n EXPANSION	Illumina	Clinically affected; first reported episode of weakness occurred at age 8, which was diagnosed as dermatomyositis; distal weakness; myopathic facies; long, thin face; clinical and electrical myotonia; occasional hand cramping; marked lid lag; distal atrophy of hands and feet; reduced muscle mass; difficulty swallowing; marked myotonic response with percussion of the tongue; absent deep tendon ref…
NA05164	DM1	DMPK	Expansion	Female	44.8212192275127	150	340	(CTG)n EXPANSION	Illumina	Clinically affected; hand cramping present since childhood; difficulty swallowing; myotonic facies; lack of facial expression; myotonia evident with grip and with percussion of the thenar eminence; significant weakness in the hands; marked weakness of neck flexors; weakness in the foot-toe extensors and foot dorsiflexors; difficulty getting pregnant; donor subject has one normal CTG repeat (21) a…
NA04648	DM1	DMPK	Expansion	Male	49.4839109881726	150	1000	(CTG)n EXPANSION	Illumina	Clinically affected; diagnosed at age 22; bilateral cataracts; frontal baldness; bilateral ptosis; limitation of full lid closure; myotonic ocular response; facial diparesis; diminished phonation amplitude; weakness of intrinsic muscles of the face; myotonic lingual response; loss of muscle bulk to the hands; depressed deep tendon reflexes; myotonia evident with hand grip and after thenar percuss…
NA05152	DM1	DMPK	Expansion	Male	49.957055124701	150	1500	(CTG)n EXPANSION	Illumina	Clinically affected; weakness in hands noted at age 43; pain in calf muscles after walking and fatigue in legs; problems with balance; palmar erythema on the hands; slight ataxia in lower extremities; slight lordosis; hypoactive reflexes; weakness in all extremity muscles; abnormal esophageal motility; long, thin face; thin extremities and thin chest; weakness of neck flexion; myotonia; myopathic…
NA23378	DM1	DMPK	Expansion	Male	47.2227176270589	150	80-90	(CTG)n EXPANSION	Illumina	Clinically affected; mild phenotype; two affected children; onset of symptoms at age 50 years; donor subject has one normal CTG repeat allele and one allele with a CTG repeat size of approximately 80-90 in the DMPK gene
NA23374	DM1	DMPK	Expansion	Female	44.385104751338	150	130-140	(CTG)n EXPANSION	Illumina	Clinically affected; onset of symptoms at age 27 years; began using a walker at age 38; hand stiffness; problems making a fist; problems speaking; difficulty swallowing; facial weakness; problems with ankles; problems rising from a sitting position; difficulty breathing; donor subject has one normal CTG repeat allele and one allele with a CTG repeat size of approximately 130-140 in the DMPK gene
NA23300	DM1	DMPK	Expansion	Male	46.311265943196	150	150-160	(CTG)n EXPANSION	Illumina	Clinically affected; onset of symptoms at age 29 years; hand stiffness; problems making a fist; problems speaking; difficulty swallowing; facial weakness; problems with ankles; problems rising from a sitting position; cataracts; baldness; donor subject has one normal CTG repeat allele and one allele with a CTG repeat size of approximately 150-160 in the DMPK gene
NA03986	DM1	DMPK	Expansion	Male	48.1201955851949	150	500	(CTG)n EXPANSION	Illumina	Distal weakness; clinical and electrical (EMG) myotonia; cataracts; marked balding; see GM03987 Fibroblast; expansion of CTG repeat is <1.5 kb detectable by Southern analysis corresponding to up to 500 CTG repeats
NA03989	DM1	DMPK	Expansion	Male	47.0162011532907	150	2000	(CTG)n EXPANSION	Illumina	Distal weakness; frontal baldness; cataracts; clinical and electrical (EMG) myotonia; expansion of CTG repeat greater than or equal to 4.5 kb by Southern analysis corresponding to up to 2000 CTG repeats
NA03990	DM1	DMPK	Expansion	Female	45.9355994705292	150	50-80	(CTG)n EXPANSION	Illumina	Distal weakness; cataracts; clinical and electrical myotonia; frontal baldness; see GM03991 Fibroblast; 50 to 80 CTG repeats detectable by PCR, no visible expansion by Southern analysis
NA03696	DM1	DMPK	Expansion	Female	47.6507833352643	150	1000	(CTG)n EXPANSION	Illumina	Family history of clinical phenotype; EMG myotonia and mild myopathic facies; affected father is GM03759A Fibroblast; expansion of CTG repeat is 1.5 to 3.0 kb by Southern analysis corresponding to up to 1000 CTG repeats
NA03759	DM1	DMPK	Expansion	Male	47.8684448289356	150	2000	(CTG)n EXPANSION	Illumina	EMG myotonia; myotonic face; distal weakness and atrophy; positive family history; affected daughter is GM03696C Lymphoid; expansion of CTG repeat is greater than or equal to 4.5 kb by Southern analysis corresponding to up to 2000 CTG repeats
NA04034	DM1	DMPK	Expansion	Male	45.9974818101159	150	1000	(CTG)n EXPANSION	Illumina	Temporal atrophy; clinical myotonia; distal weakness; positive family history; see GM04033 Fibroblast; expansion of CTG repeat is 1.5 to 3.0 kb detectable by Southern analysis corresponding to up to 1000 CTG repeats
NA03697	DM1	DMPK	Expansion	Male	48.0665903444852	150	500	(CTG)n EXPANSION	Illumina	Myotonic face; EMG myotonia; distal atrophy; positive family history; expansion of CTG repeat is <1.5 kb detectable by Southern analysis corresponding to up to 500 CTG repeats
NA03132	DM1	DMPK	Expansion	Male	44.3056388859679	150	1700	(CTG)n EXPANSION	Illumina	Bone deformities; muscle wasting and myotonia; one DMPK allele harbors approximately 1700 copies of the CTG trinucleotide repeat, as assayed by Southern analysis; the other DMPK allele is normal, with 5 copies of the CTG trinucleotide repeat, as detected by PCR.
NA03756	DM1	DMPK	Expansion	Male	48.138161045742	150	500	(CTG)n EXPANSION 677C>T	Illumina	Typical phenotype; mother, 2 brothers, and a sister are also affected; see GM03755 Fibroblast; expansion of CTG repeat is <1.5 kb detectable by Southern analysis corresponding to up to 500 CTG repeats; heterozygous for a C-to-T substitution at nucleotide 677 that converts an alanine to a valine residue in the methylenetetrahydrofolate reductase (MTHFR) gene (677C-T)
NA13716	DRPLA	ATN1	Expansion	Male	46.6752390737322	150	68	(CAG)n EXPANSION	Illumina	Hyperactivity & short attention span at age 7; at age 8 showed developmental & cognitive regression; significantly demented at age 12; recurrent generalized tonic-clonic seizures; DRPLA CAG expansion repeat alleles are 16 and 68
NA13717	DRPLA	ATN1	Expansion	Male	49.3516790260551	150	65	(CAG)n EXPANSION	Illumina	Progressive neurodegenerative disorder; ataxia, cognitive impairment, dementia, choreiform movements, and speech difficulties; seizure disorder at age 46; DRPLA CAG expansion repeat alleles are 15 and 65
NA03816	FRDA	FXN	Double Expansion	Female	46.67650189864	150	330/380	(GAA)n EXPANSION	Illumina	Clinically affected; spinal-cerebral degeneration with myocardiopathy; homozygous for the GAA expansion in the frataxin gene with alleles of approximately 330 and 380 repeats; a brother (GM04078/GM04079) is similarly affected.
NA04079	FRDA	FXN	Double Expansion	Male	48.7115103074178	150	420/540	(GAA)n EXPANSION	Illumina	Clinically affected; ataxia; cardiomyopathy; mild peripheral neuropathy; proband is GM03816; homozygous for the GAA expansion in the frataxin gene with alleles of approximately 541 and 420 repeats; see GM04078 Fibroblast.
NA14519	FRDA	FXN	Carrier	Female	47.5442474725129	150	9/1285	(GAA)n EXPANSION	Illumina	Clinically unaffected carrier; mother of affected child (GM14518); donor subject has alleles with GAA triplet repeat expansions of 9 repeats and 1285 + 50 repeats in the first intron of the frataxin gene.
NA15850	FRDA	FXN	Double Expansion	Male	48.4070835546991	150	650/1030	(GAA)n EXPANSION	Illumina	Clinically affected; ataxia; scoliosis; hypertrophic cardiomyopathy; slurred speech; homozygous for the GAA expansion in the frataxin gene with alleles of approximately 650 and 1030 repeats; brother of GM15849 and GM15851, son of GM15847 and GM15848.
NA15847	FRDA	FXN	Carrier	Female	45.3969017601425	150	760	(GAA)n EXPANSION	Illumina	Clinically unaffected carrier; mother of one affected child (GM15850), a carrier (GM15849), & one normal child (GM15851); donor subject has one allele with GAA triplet repeat expansions of 760 in the first intron of the frataxin gene and the 2nd allele has a # of GAA repeats within normal limits.
NA15848	FRDA	FXN	Carrier	Male	48.8163623067898	150	830	(GAA)n EXPANSION	Illumina	Clinically unaffected carrier; father of one affected child (GM15850), a carrier (GM15849), & one normal child (GM15851); donor subject has one allele with GAA triplet repeat expansions of 830 in the first intron of the frataxin gene and the 2nd allele has a # of GAA repeats within normal limits.
NA16197	FRDA	FXN	Double Expansion	Male	49.011773803386	150	760/830	(GAA)n EXPANSION	Illumina	Clinically affected; onset at 8 1/2 years of age; ataxia; mild cardiomyopathy; areflexia; weakness; sensory loss; scoliosis with spinal fusion; homozygous for the GAA expansion in the frataxin gene with alleles of approximately 760 and 830 repeats.
NA16200	FRDA	FXN	Carrier	Female	48.3788747715724	150	830	(GAA)n EXPANSION	Illumina	Clinically unaffected carrier; mother of an affected son (GM16197); donor subject has one allele with GAA triplet repeat expansion of 830 in the first intron of the frataxin gene and the 2nd allele has a # of GAA repeats within normal limits.
NA16202	FRDA	FXN	Carrier	Female	48.9736910643482	150	830	(GAA)n EXPANSION	Illumina	Clinically unaffected carrier; mother of an affected daughter (GM16203); donor subject has one allele with GAA triplet repeat expansion of 830 in the first intron of the frataxin gene and the 2nd allele has a # of GAA repeats within normal limits.
NA16203	FRDA	FXN	Double Expansion	Female	50.178252822613	150	670/830	(GAA)n EXPANSION	Illumina	Clinically affected; onset at 6 years of age; ataxia; areflexia; sensory loss; dysarthria; scoliosis; hearing loss; homozygous for the GAA expansion in the frataxin gene with alleles of approximately 670 and 830 repeats.
NA16205	FRDA	FXN	Double Expansion	Male	50.1438742707232	150	530/530	(GAA)n EXPANSION	Illumina	Clinically affected; onset at 12 years of age; ataxia; weakness; sensory loss; homozygous for the GAA expansion in the frataxin gene with both alleles of approximately 530 repeats.
NA16209	FRDA	FXN	Double Expansion	Female	49.7465418047206	150	800/800	(GAA)n EXPANSION	Illumina	Clinically affected; age of onset 10; ataxia; cardiomyopathy; areflexia; weakness; sensory loss; dysarthria; scoliosis; nystagmus; homozygous for the GAA expansion in the frataxin gene with both alleles of approximately 800 repeats.
NA16210	FRDA	FXN	Double Expansion	Male	50.6924982255759	150	580/580	(GAA)n EXPANSION	Illumina	Clinically affected; onset at 17 years of age; ataxia; areflexia; weakness; sensory loss; dysarthria; scoliosis; reduced visual acuity; hearing loss; homozygous for the GAA expansion in the frataxin gene with both alleles of approximately 580 repeats.
NA16212	FRDA	FXN	Carrier	Female	48.5349056570965	150	500	(GAA)n EXPANSION	Illumina	Clinically unaffected carrier; mother of an affected son (GM16210); donor subject has one allele with GAA triplet repeat expansion of 500 in the first intron of the frataxin gene and the 2nd allele has a # of GAA repeats within normal limits.
NA16216	FRDA	FXN	Double Expansion	Female	44.7817342128224	150	200/500	(GAA)n EXPANSION	Illumina	Clinically affected; homozygous for the GAA expansion in the frataxin gene with alleles of approximately 200 and 500 repeats.
NA16213	FRDA	FXN	Carrier	Male	44.5299974688847	150	420	(GAA)n EXPANSION	Illumina	Clinically unaffected carrier; father of an affected daughter (GM16216); donor subject has one allele with GAA triplet repeat expansion of 420 in the first intron of the frataxin gene and the 2nd allele has a # of GAA repeats within normal limits.
NA16215	FRDA	FXN	Carrier	Female	43.7743626897201	150	830	(GAA)n EXPANSION	Illumina	Clinically unaffected carrier; mother of an affected son (GM16214); donor subject has one allele with GAA triplet repeat expansion of 830 in the first intron of the frataxin gene and the 2nd allele has a # of GAA repeats within normal limits.
NA16214	FRDA	FXN	Double Expansion	Male	45.6132431893262	150	600/700	(GAA)n EXPANSION	Illumina	Clinically affected; onset at 9 years of age; ataxia; cardiomyopathy; areflexia; weakness; scoliosis; homozygous for the GAA expansion in the frataxin gene with alleles of approximately 600 and 700 repeats.
NA16227	FRDA	FXN	Double Expansion	Female	43.948140903016	150	630/830	(GAA)n EXPANSION	Illumina	Clinically affected; onset at 13 years of age; ataxia; areflexia; weakness; sensory loss; scoliosis; affected sister is GM16228; homozygous for the GAA expansion in the frataxin gene with alleles of approximately 630 and 830 repeats.
NA16229	FRDA	FXN	Carrier	Female	45.0444932568123	150	670	(GAA)n EXPANSION	Illumina	Clinically unaffected carrier; mother of two affected daughters (GM16227 and GM16228); donor subject has one allele with GAA triplet repeat expansion of 670 in the first intron of the frataxin gene and the 2nd allele has a # of GAA repeats within normal limits.
NA16228	FRDA	FXN	Double Expansion	Female	46.179908083262	150	670/830	(GAA)n EXPANSION	Illumina	Clinically affected; onset at 12 years of age; ataxia; areflexia; weakness; scoliosis; nystagmus; affected sister is GM16227; homozygous for the GAA expansion in the frataxin gene with alleles of approximately 670 and 830 repeats.
NA16237	FRDA	FXN	Carrier	Female	43.0490154035068	150	700	(GAA)n EXPANSION	Illumina	Clinically unaffected carrier; mother of an affected son (GM16243); donor subject has one allele with GAA triplet repeat expansion of 700 in the first intron of the frataxin gene and the 2nd allele has a # of GAA repeats within normal limits.
NA16243	FRDA	FXN	Double Expansion	Male	46.517913683568	150	670/1170	(GAA)n EXPANSION	Illumina	Clinically affected; age of onset 14; ataxia; cardiomyopathy; areflexia; weakness; sensory loss; dysarthria; scoliosis; reduced visual acuity; hearing loss; affected sister; homozygous for the GAA expansion in the frataxin gene with alleles of approximately 670 and 1170 repeats.
NA16240	FRDA	FXN	Carrier	Male	46.2081850076381	150	830	(GAA)n EXPANSION	Illumina	Clinically unaffected carrier; father of affected child; donor subject has one allele with GAA triplet repeat expansion of 830 in the first intron of the frataxin gene and the 2nd allele has a # of GAA repeats within normal limits.
NA16207	FRDA	FXN	Double Expansion	Female	49.7895600404975	150	280/830	(GAA)n EXPANSION	Illumina	Clinically affected; age of onset 23; ataxia; areflexia; weakness; sensory loss; dysarthria; homozygous for the GAA expansion in the frataxin gene with alleles of approximately 280 and 830 repeats.
NA06895	FXS	FMR1	Normal	Male	45.5523989088931	150	23	(CGG)n EXPANSION	Illumina	Clinically normal; 1 affected son and 2 grandsons; 46,XY in peripheral blood lymphocytes; normal male by Southern and PCR analyses; CGG repeat is 23
NA04025	FXS	FMR1	Expansion	Male	49.430236602306	150	645	(CGG)n EXPANSION	Illumina	Macro-orchidism; mental retardation; 52% 46,fra(X)(q27),Y in PBL and 4% in fibroblasts; fra(X) observed in 0 to 50% of lymphoblasts using FudR; G6PD type A in blood; see GM04024 Fibroblast; CGG repeat size of 645 in the FMR1 gene as detected by PCR (normal size range is 5-45 repeats); full mutation (fully methylated) characteristic of Fragile X syndrome.
NA04926	FXS	FMR1	Expansion	Male	48.8545969114385	150	NA	(CGG)n EXPANSION	Illumina	Mental retardation and macro-orchidism; 46,fra(X)(q2800),Y in PBL; similarly affected brother and cousins; affected male by Southern analysis
NA05131	FXS	FMR1	Expansion	Male	44.5448196710185	150	NA	(CGG)n EXPANSION	Illumina	Affected male by Southern analysis; 46, fra(X)(q27),Y in PBL; 8% of fibroblasts show fra(X) with FudR; mother is GM05855B Lymphoid; similarly affected brother and uncle.
NA05185	FXS	FMR1	Expansion	Male	44.190542245323	150	NA	(CGG)n EXPANSION	Illumina	46,fra(X),Y present in 30-50% of PBL; affected male by Southern analysis
NA09145	FXS	FMR1	Expansion	Male	47.1163211866408	150	NA	(CGG)n EXPANSION	Illumina	Clinically affected; hyperactive, developmental delay, seizures, and esotropia;46,fra(X)(q27,Y in PBL;full expansion by Southern analysis;son of GM06863.
NA09237	FXS	FMR1	Expansion	Male	47.9042189884893	150	931-940	(CGG)n EXPANSION	Illumina	Low-normal IQ; hyperactive; short attention span; 46,fra(X)(q27),Y in PBL; CGG repeats in the FMR1 gene range from 931-940 (normal size range is 5-45 repeats); full mutation (fully methylated) characteristic of Fragile X syndrome; son of GM09238.
NA07063	FXS	FMR1	NA	Female	77.3911929316335	150	NA	(CGG)n EXPANSION	Illumina	Slow learner; 14/50 blood lymphocytes showed fra(X); 4 affected cousins; daughter of GM07064A; 7% of lymphoblasts were positive for the Xq27-28 fragile site; carrier female by Southern analysis
NA07539	FXS	FMR1	Normal	Male	49.1098134941507	150	23	(CGG)n EXPANSION	Illumina	Clinically normal; normal male by Southern & PCR analyses; 46,XY in PBL; CGG repeat is 23; brother of GM07536.
NA06890	FXS	FMR1	Normal	Male	42.5443823266974	150	30	(CGG)n EXPANSION	Illumina	Clinically normal; affected brother and 2 nephews; 46,XY in peripheral blood lymphocytes; normal male by Southern and PCR analyses; CGG repeat is 30
NA06905	FXS	FMR1	Premutation	Female	46.0743235124888	150	23/70	(CGG)n EXPANSION	Illumina	Clinically normal; 1 affected son and great-grandson; negative for fra(X) in PBL; carrier female by Southern and PCR analyses; CGG repeats are 70 and 23
NA07536	FXS	FMR1	Normal	Male	47.3683752970818	150	23	(CGG)n EXPANSION	Illumina	Clinically normal; possible normal "carrier"; 46,XY in PBL; normal male by Southern & PCR analyses; CGG repeat is 23
NA07540	FXS	FMR1	Normal	Female	47.5379808434543	150	23/29	(CGG)n EXPANSION	Illumina	Clinically normal; sister of GM07536; negative for fra(X) in PBL; normal female by Southern and PCR analyses; CGG repeats are 29 & 23
NA07542	FXS	FMR1	Normal	Male	46.8860643957427	150	23	(CGG)n EXPANSION	Illumina	Clinically normal; twin of GM07536; 46, XY in PBL; normal male by Southern & PCR analyses; CGG repeat is 23
NA06910	FXS	FMR1	Premutation	Female	45.9772923047645	150	30/75-89	(CGG)n EXPANSION	Illumina	Clinically normal; negative for fra(X) in PBL; carrier female by Southern and PCR analyses; CGG repeats are 75-89 and 30
NA06894	FXS	FMR1	Premutation	Female	43.2503262059452	150	30/78	(CGG)n EXPANSION	Illumina	Clinically normal; 1 affected son and 2 grandsons; 46,XX in peripheral blood lymphocytes; carrier female by Southern and PCR analyses; CGG repeats are 78 and 30
NA07541	FXS	FMR1	Normal	Female	48.4070544622506	150	29/30	(CGG)n EXPANSION	Illumina	Clinically normal; daughter of GM07540; negative for fra(X) in PBL; normal female by Southern and PCR analyses; CGG repeats are 31and 29
NA07175	FXS	FMR1	Normal	Female	45.001431833438	150	23/30	(CGG)n EXPANSION	Illumina	Clinically normal; 46,XX in PBL; affected brother and 2 nephews; normal female by Southern and PCR analyses; CGG repeats are 30 and 23
NA06889	FXS	FMR1	Normal	Female	46.0126497264435	150	23/30	(CGG)n EXPANSION	Illumina	Clinically normal; possible heterozygote; affected brother and 2 nephews; 46, XX in peripheral blood lymphocytes; normal female by Southern and PCR analyses; CGG repeats are 30 and 23
NA06893	FXS	FMR1	Normal	Female	39.5781997555039	150	23/30	(CGG)n EXPANSION	Illumina	Clinically normal; affected brother and 2 nephews; 46,XX in PBL; normal female by Southern and PCR analyses; CGG repeats are 30 and 23
NA06896	FXS	FMR1	Premutation	Female	45.9930733474211	150	23/95-140	(CGG)n EXPANSION	Illumina	Clinically normal; 2 affected sons and a brother; negative for fra(X) in PBL; carrier female by Southern and PCR analyses; CGG repeats are 95-120-140 and 23
NA07538	FXS	FMR1	Normal	Female	46.5929455657073	150	29/29	(CGG)n EXPANSION	Illumina	Clinically normal; 1 affected brother; daughter of GM07537A; negative for fra(X) in PBL; normal female by Southern and PCR analyses; CGG repeats are 29 and 29
NA07537	FXS	FMR1	Expansion	Female	46.8994742982495	150	28-29/>200?	(CGG)n EXPANSION	Illumina	Clinically normal; positive for fra(X) in PBL; carrier female by Southern and PCR analyses; PCR analysis shows that 1 allele has CGG repeats of 28-29 and a second allele possibly has the full mutation with greater than 200 repeats; sister of GM07536; 1 affected son and 2 affected grandsons.
NA06897	FXS	FMR1	Expansion	Male	42.3345646019128	150	477	(CGG)n EXPANSION	Illumina	Mental retardation; typical facies; large ears; macro-orchidism; 46,fra(X)(q27),Y in PBLs; in lymph culture, 2% of cells are positive with methotrexate and 6% are positive with FudR; low but detectable FMR-1 gene expression; CGG repeat size of 477 in the FMR1 gene as detected by PCR (normal size range is 5-45 repeats); full mutation (fully methylated) characteristic of Fragile X syndrome.
NA07174	FXS	FMR1	Normal	Male	45.1165954924511	150	30	(CGG)n EXPANSION	Illumina	46,XY in PBL; could be a "non-expressing male" based upon family history: affected brother and 2 nephews; normal male by Southern and PCR analyses; CGG repeat is 30; DNA obtained from the donor subject's lymphoblastoid cell line was sequenced in triplicate and the average CGG repeat in the FMR1 gene is 30
NA06903	FXS	FMR1	Premutation	Female	39.5374731103411	150	23/95	(CGG)n EXPANSION	Illumina	Clinically normal; affected son is GM06852A; daughter of GM06904A and GM06906A; negative for fra(X) in peripheral blood lymphocytes; carrier female by Southern and PCR analyses; CGG repeats are 95 and 23
NA07543	FXS	FMR1	Normal	Female	46.3803712518592	150	20/29	(CGG)n EXPANSION	Illumina	Clinically normal; 5 sibs with mental retardation; mother is affected sister of GM07536; negative for fra(X) in PBL; normal female by Southern & PCR analyses; CGG repeats are 29 & 20
NA06852	FXS	FMR1	Expansion	Male	45.3070746629254	150	>200	(CGG)n EXPANSION	Illumina	Seizures; borderline IQ; large ears; positive family history for fra(X) and mental retardation; 46,fra(X)(q27),Y in PBL but not observed in lymphoblast culture; son of GM06903A; affected male by Southern and PCR analyses; CGG repeats >200
NA06891	FXS	FMR1	Premutation	Male	42.3700304689627	150	100-117	(CGG)n EXPANSION	Illumina	Clinically normal; affected brother and 2 nephews; negative for fra(X) in peripheral blood lymphocytes; normal transmitting male by Southern and PCR analyses; CGG repeat is 100-117; DNA obtained from the donor subject's lymphoblastoid cell line was sequenced in triplicate and the average CGG repeat in the FMR1 gene is 118
NA06907	FXS	FMR1	Premutation	Female	43.9892092943397	150	29/85	(CGG)n EXPANSION	Illumina	Clinically normal; affected nephew and uncle; sister of GM06903A; daughter of GM06904A and GM06906A; negative for fra(X) in PBL; carrier female by Southern and PCR analyses; CGG repeats are 85 and 29
NA06906	FXS	FMR1	Premutation	Male	46.2108781242456	150	96	(CGG)n EXPANSION	Illumina	Clinically normal; affected brother and grandson; son of GM06905A; husband of GM06904A; father of GM06903A and GM06907A; suspected "carrier" and negative for fra(X) in both PBL and lymph culture; normal transmitting male by Southern and PCR analyses; CGG repeat is 85-90; DNA obtained from the donor subject's lymphoblastoid cell line was sequenced in triplicate and the average CGG repeat in the FM…
NA06892	FXS	FMR1	Premutation	Male	46.671454529184	150	80-85	(CGG)n EXPANSION	Illumina	Clinically normal; affected grandson and 2 great-grandsons; suspected non-expressing "carrier"; 46,XY in peripheral blood lymphocytes and lymphoid culture; normal transmitting male by Southern and PCR analyses; CGG repeat is 80-85; DNA obtained from the donor subject's lymphoblastoid cell line was sequenced in triplicate and the average CGG repeat in the FMR1 gene is 93
NA06904	FXS	FMR1	Normal	Female	46.2016798483005	150	23/29	(CGG)n EXPANSION	Illumina	Clinically normal; spouse of GM06906A; mother of GM06903A and 06907A; 1 affected grandson; negative for fra(X) in PBL; normal female by Southern and PCR analyses; CGG repeats are 29 and 23
NA06968	FXS	FMR1	Premutation	Female	46.0483102216434	150	32/107	(CGG)n EXPANSION	Illumina	Obligate carrier; clinically normal; 1% of PBL show fra(X) with FudR or MTX; affected uncle and nephew; father is a normal "carrier"; son is positive for fra (X); Proband is GM07071 Fibroblast; carrier of premutation by Southern analysis; CGG repeats are 107 and 32.
NA07294	FXS	FMR1	Expansion	Male	46.2029499516507	150	NA	(CGG)n EXPANSION	Illumina	Institutionalized for mental retard; 46, fra(X)(q27),Y in 32% of PBL; G6PD type A+; a twin, not identical by HLA typing, is institutionalized but not known if mentally retarded; negative for FMR-1 gene expression; affected male by Southern analysis
NA09316	FXS	FMR1	Expansion	Male	47.392577296921	150	NA	(CGG)n EXPANSION	Illumina	46,fra(X)(q27),Y in 6% of PBL; institutionalized; mild mental retardation; affected male by Southern analysis
NA09317	FXS	FMR1	Expansion	Male	45.745132947253	150	NA	(CGG)n EXPANSION	Illumina	46,fra(X)(q27),Y in 12% of PBL; institutionalized; mild mental retardation; negative for FMR-1 gene expression; affected male by Southern analysis
NA09497	FXS	FMR1	Expansion	Male	47.7726880972237	150	NA	(CGG)n EXPANSION	Illumina	20% of PBL are positive for fra(X); similarly affected brother; large ears; macro-orchidism; mental retardation; hyperactive behavior; affected male by Southern analysis; mother is GM09444 Lymphoid
NA07730	FXS	FMR1	Expansion	Male	47.6732782374295	150	NA	(CGG)n EXPANSION	Illumina	Placental fibroblast culture; 2 affected maternal uncles have fra(X)(q27); 6% of cultured amniotic fluid cells and 26% of placental fibroblasts showed the fra(X); affected male by Southern analysis
CD00014	FXS	FMR1	Premutation	Male	49.2982304817056	150	56	(CGG)n EXPANSION	Illumina	CGG repeat is 56 as reported by the National Institute of Standards and Technology (NIST)
NA03200	FXS	FMR1	Expansion	Male	48.8052071642461	150	NA	(CGG)n EXPANSION	Illumina	46,fra(X)(q27),Y; 17% in PBL and 7 to 50% of lymphoblasts using FudR; negative for FMR-1 gene expression; affected male by Southern analysis
NA20235	FXS	FMR1	Normal	Female	45.5823978265837	150	29/45	(CGG)n EXPANSION	Illumina	Clinically unaffected; donor subject has CGG repeat sizes of 29 in allele 1 and 45 in allele 2 in the 5 prime untranslated region (UTR) of the FMR1 gene; CGG repeat size was determined by testing in 9 independent laboratories using two methods each
NA20238	FXS	FMR1	Normal	Female	43.1247803972731	150	29/30	(CGG)n EXPANSION	Illumina	Clinically unaffected; donor subject has CGG repeat sizes of 29 in allele 1 and 30 in allele 2 in the 5 prime untranslated region (UTR) of the FMR1 gene; CGG repeat size was determined by testing in 9 independent laboratories using two methods each
NA20237	FXS	FMR1	Premutation	Male	45.5891655000244	150	100-104	(CGG)n EXPANSION	Illumina	Clinically unaffected; donor subject has CGG repeat size of between 100-104 in 1 allele in the 5 prime untranslated region (UTR) of the FMR1 gene; CGG repeat size was determined by testing in 9 independent laboratories using two methods each; neither method provided a consensus
NA20239	FXS	FMR1	Premutation	Female	44.8250627424828	150	20/183-193	(CGG)n EXPANSION	Illumina	Clinically unaffected; full mutation; donor subject has CGG repeat sizes of 20 in allele 1 and between 183-193 in allele 2 in the 5 prime untranslated region (UTR) of the FMR1 gene; CGG repeat size was determined by testing in 9 independent laboratories using two methods each; neither method provided a consensus on allele two
NA20242	FXS	FMR1	Premutation	Female	42.5965680089773	150	30/73	(CGG)n EXPANSION	Illumina	Clinically unaffected; donor subject has CGG repeat sizes of 30 in allele 1 and 73 in allele 2 in the 5 prime untranslated region (UTR) of the FMR1 gene; CGG repeat size was determined by testing in 9 independent laboratories using two methods each
NA20243	FXS	FMR1	Normal	Female	42.5035626591934	150	29/41	(CGG)n EXPANSION	Illumina	Clinically unaffected; donor subject has CGG repeat sizes of 29 in allele 1 and 41 in allele 2 in the 5 prime untranslated region (UTR) of the FMR1 gene; CGG repeat size was determined by testing in 9 independent laboratories using two methods each
NA20230	FXS	FMR1	Normal	Male	46.3536197200697	150	53	(CGG)n EXPANSION	Illumina	Clinically unaffected; donor subject has CGG repeat size of 53 in 1 allele in the 5 prime untranslated region (UTR) of the FMR1 gene; CGG repeat size was determined by testing in 9 independent laboratories using two methods each
NA20232	FXS	FMR1	Normal	Male	46.7711246006676	150	46	(CGG)n EXPANSION	Illumina	Clinically unaffected; donor subject has CGG repeat size of 46 in 1 allele in the 5 prime untranslated region (UTR) of the FMR1 gene; CGG repeat size was determined by testing in 9 independent laboratories using two methods each
NA20233	FXS	FMR1	Premutation	Male	46.8639402331816	150	117	(CGG)n EXPANSION	Illumina	Clinically unaffected; probable fragile X tremor/ataxia syndrome (FXTAS); donor subject has CGG repeat size of 117 in 1 allele in the 5 prime untranslated region (UTR) of the FMR1 gene; CGG repeat size was determined by testing in 9 independent laboratories using two methods each; only one method provided a consensus
NA20234	FXS	FMR1	Normal	Female	47.2067640399163	150	31/46	(CGG)n EXPANSION	Illumina	Clinically unaffected; donor subject has CGG repeat sizes of 31 in allele 1 and 46 in allele 2 in the 5 prime untranslated region (UTR) of the FMR1 gene; CGG repeat size was determined by testing in 9 independent laboratories using two methods each
NA20236	FXS	FMR1	Normal	Female	45.1308265029618	150	31/53	(CGG)n EXPANSION	Illumina	Clinically unaffected; donor subject has CGG repeat sizes of 31 in allele 1 and 53 in allele 2 in the 5 prime untranslated region (UTR) of the FMR1 gene; CGG repeat size was determined by testing in 9 independent laboratories using two methods each
NA20231	FXS	FMR1	Premutation	Male	45.5157040244672	150	76	(CGG)n EXPANSION	Illumina	Clinically unaffected; Donor subject has CGG repeat size of 76 in 1 allele in the 5 prime untranslated region (UTR) of the FMR1 gene; CGG repeat size was determined by testing in 9 independent laboratories using two methods each
NA20240	FXS	FMR1	Premutation	Female	43.4229700100459	150	30/80	(CGG)n EXPANSION	Illumina	Clinically unaffected; donor subject has CGG repeat sizes of 30 in allele 1 and 80 in allele 2 in the 5 prime untranslated region (UTR) of the FMR1 gene; CGG repeat size was determined by testing in 9 independent laboratories using two methods each
NA20241	FXS	FMR1	Premutation	Female	43.5501479424192	150	29/93-110	(CGG)n EXPANSION	Illumina	Clinically unaffected; donor subject has CGG repeat sizes of 29 in allele 1 and between 93-110 in allele 2 in the 5 prime untranslated region (UTR) of the FMR1 gene; CGG repeat size was determined by testing in 9 independent laboratories using two methods each; neither method provided a consensus on allele two
NA20244	FXS	FMR1	Normal	Male	45.8333367967441	150	41	(CGG)n EXPANSION	Illumina	Clinically unaffected; donor subject has a CGG repeat size of 41 in 1 allele in the 5 prime untranslated region (UTR) of the FMR1 gene; CGG repeat size was determined by testing in 9 independent laboratories using two methods each
NA07862	FXS	FMR1	Expansion	Male	47.322309237105	150	501-550	(CGG)n EXPANSION	Illumina	Mental retardation; typical facies; large testes; hyperactive; affected monozygotic twin brother is GM07861; CGG repeats in the FMR1 gene range from 501-550 as detected by PCR (normal size range is 5-45 repeats); full mutation (fully methylated) characteristic of Fragile X syndrome.
NA13509	HD	HTT	Expansion	Female	47.0544125762083	150	15/70	(CAG)n EXPANSION	Illumina	Clinically affected; expanded CAG repeat HD alleles are 70 and 15; see GM21756 Fibroblast
NA13515	HD	HTT	Expansion	Male	49.0678188694084	150	16/66	(CAG)n EXPANSION	Illumina	Clinically affected; expanded CAG repeat HD alleles are 66 and 16; see GM21757 Fibroblast
CD00022	HD	HTT	Premutation	Female	47.8708219020957	150	18/31	(CAG)n EXPANSION	Illumina	CAG repeats in the HD gene are 31 and 18
NA13507	HD	HTT	Expansion	Male	35.8859208073793	150	15/55	(CAG)n EXPANSION	Illumina	Clinically affected; expanded CAG repeat HD alleles are 55 and 15.
NA13508	HD	HTT	Expansion	Male	46.0100982318932	150	22/58	(CAG)n EXPANSION	Illumina	Clinically affected; expanded CAG repeat HD alleles are 58 and 22.
NA13510	HD	HTT	Expansion	Male	45.8662807888972	150	15/44	(CAG)n EXPANSION	Illumina	Clinically affected; expanded CAG repeat HD alleles are 44 and 15.
NA13511	HD	HTT	Expansion	Male	47.4461460283252	150	45/47	(CAG)n EXPANSION	Illumina	Clinically affected; expanded CAG repeat HD alleles are 47 and 45.
NA13512	HD	HTT	Expansion	Female	46.8036660169538	150	16/44	(CAG)n EXPANSION	Illumina	Clinically affected; expanded CAG repeat HD alleles are 44 and 16.
NA13513	HD	HTT	Expansion	Female	48.8753213823697	150	15/49	(CAG)n EXPANSION	Illumina	Clinically affected; expanded CAG repeat HD alleles are 49 and 15.
NA13514	HD	HTT	Expansion	Female	48.0494268035157	150	15/52	(CAG)n EXPANSION	Illumina	Clinically affected; expanded CAG repeat HD alleles are 52 and 15.
NA13503	HD	HTT	Expansion	Female	44.2497120137793	150	17/45	(CAG)n EXPANSION	Illumina	Clinically affected; expanded CAG repeat HD alleles are 45 and 17.
NA13504	HD	HTT	Expansion	Male	45.4817816576975	150	16/46	(CAG)n EXPANSION	Illumina	Clinically affected; expanded CAG repeat HD alleles are 46 and 16.
NA13505	HD	HTT	Expansion	Male	49.6367071829747	150	22/50	(CAG)n EXPANSION	Illumina	Clinically affected; expanded CAG repeat HD alleles are 50 and 22.
NA13506	HD	HTT	Expansion	Male	42.201349472378	150	17/48	(CAG)n EXPANSION	Illumina	Clinically affected; expanded CAG repeat HD alleles are 48 and 17.
NA06926	SCA1	ATXN1	Expansion	Male	44.7018083265633	150	29/52	(CAG)n EXPANSION	Illumina	Olivopontocerebellar atrophy type 1; spinocerebellar ataxia; 6 affected generations; see GM06927 Fibroblast; analysis of ATXN1 (ATX1) alleles showed normal allele with 29 CAG repeats and expanded allele with 52 repeats
NA13536	SCA1	ATXN1	Expansion	Female	44.7006220210627	150	31/43	(CAG)n EXPANSION	Illumina	Ataxia; 6 affected generations in pedigree; analysis of ATXN1 (ATX1) alleles showed normal allele with 31 CAG repeats and expanded allele with 43 repeats
NA13537	SCA1	ATXN1	Expansion	Male	46.7274540225836	150	32/60	(CAG)n EXPANSION	Illumina	Ataxia; dysarthria; amyotrophy; dysphagia; analysis of ATXN1 (ATX1) alleles showed normal allele with 32 CAG repeats and expanded allele with 60 repeats
NA06151	SCA3	ATXN3	Expansion	Male	43.1504425301542	150	24/74	(CAG)n EXPANSION	Illumina	Portuguese; affected father and two sibs; SCA Type III (SCA3): ataxia, nystagmus, and dysarthria; allele 1 has 24 CAG repeats in the ATXN3 (MJD) gene; allele 2 has 74 CAG repeats
NA23709	SMBA	AR	Expansion	Male	48.9019583690766	150	51	(CAG)n EXPANSION	Illumina	Clinically affected; onset of symptoms at age 45; this subject has 51 CAG trinucleotide repeats in the first exon of the androgen receptor gene (AR)(normal range= 4-33 copies); positive family history: maternal grandfather had severe leg weakness and 3 male cousins have tested positive for SBMA (samples from family are not in repository).
8	HD	HTT	Expansion	Male	41.6532084912176	151	16/45	(CAG)n EXPANSION	NYGC	Nano 450bp Xv1
9	HD	HTT	Expansion	Female	42.0306846948711	151	20/42	(CAG)n EXPANSION	NYGC	Nano 450bp Xv1
170	HD	HTT	Expansion	Female	39.0934804685766	151	40/50	(CAG)n EXPANSION	NYGC	Nano 450bp Xv1
171	HD	HTT	Normal	Male	43.1862592333329	151	17/18	(CAG)n EXPANSION	NYGC	Nano 450bp Xv1
192	HD	HTT	Expansion	Male	38.9188949278056	151	21/45	(CAG)n EXPANSION	NYGC	Nano 450bp Xv1
193	HD	HTT	Normal	Female	42.5843397717109	151	18/22	(CAG)n EXPANSION	NYGC	Nano 450bp Xv1
196	HD	HTT	Expansion	Male	48.0465457194887	151	22/68	(CAG)n EXPANSION	NYGC	Nano 450bp Xv1
197	HD	HTT	Expansion	Female	42.7200327121633	151	22/63	(CAG)n EXPANSION	NYGC	Nano 450bp Xv1
975	HD	HTT	Expansion	Female	38.1201687794827	151	19/45	(CAG)n EXPANSION	NYGC	Nano 450bp Xv1
988	HD	HTT	Expansion	Female	39.1973558941359	151	19/43	(CAG)n EXPANSION	NYGC	Nano 450bp Xv1
1042	HD	HTT	Expansion	Male	43.1235104987577	151	22/47	(CAG)n EXPANSION	NYGC	Nano 450bp Xv1
1133	HD	HTT	Premutation	Female	39.6867423665119	151	19/37	(CAG)n EXPANSION	NYGC	Nano 450bp Xv1
4271	HD	HTT	Expansion	Female	48.3506747544869	151	20/40	(CAG)n EXPANSION	NYGC	PCR-free 450bp, Xv2.5
6779	HD	HTT	Expansion	Male	55.9443897361758	151	20/41	(CAG)n EXPANSION	NYGC	PCR-free 450bp, Xv2.5
6783	HD	HTT	Expansion	Female	47.8895459104111	151	20/40	(CAG)n EXPANSION	NYGC	PCR-free 450bp, Xv2.5
6782	HD	HTT	Expansion	Male	46.5464940229141	151	24/41	(CAG)n EXPANSION	NYGC	PCR-free 450bp, Xv2.5
932	HD	HTT	Expansion	Female	39.5636529134281	151	14/46	(CAG)n EXPANSION	NYGC	PCR-free 450bp, Xv2.5
994	HD	HTT	Normal	Male	45.9634011356336	151	17/17	(CAG)n EXPANSION	NYGC	PCR-free 450bp, Xv2.5
1002	HD	HTT	Expansion	Female	44.8507303852414	151	17/46	(CAG)n EXPANSION	NYGC	PCR-free 450bp, Xv2.5
931	HD	HTT	Expansion	Male	69.2239765186095	151	18/45	(CAG)n EXPANSION	NYGC	PCR-free 450bp, Xv2.5
2992	HD	HTT	Expansion	Female	44.0331610502063	151	18/43	(CAG)n EXPANSION	NYGC	PCR-free 450bp, Xv2.5
2993	HD	HTT	Expansion	Female	50.2092027768389	151	18/44	(CAG)n EXPANSION	NYGC	PCR-free 450bp, Xv2.5
2996	HD	HTT	Expansion	Female	44.7026480562548	151	18/46	(CAG)n EXPANSION	NYGC	PCR-free 450bp, Xv2.5
964	HD	HTT	Normal	Male	44.6913166244464	151	19/19	(CAG)n EXPANSION	NYGC	PCR-free 450bp, Xv2.5
963	HD	HTT	Expansion	Female	42.4368131772949	151	14/48	(CAG)n EXPANSION	NYGC	PCR-free 450bp, Xv2.5
981	HD	HTT	Expansion	Female	47.8266502336229	151	19/46	(CAG)n EXPANSION	NYGC	PCR-free 450bp, Xv2.5
985	HD	HTT	Expansion	Female	57.1643775289324	151	19/46	(CAG)n EXPANSION	NYGC	PCR-free 450bp, Xv2.5
119	HD	HTT	Expansion	Female	46.6073550359091	151	20/41	(CAG)n EXPANSION	NYGC	PCR-free 450bp, Xv2.5
154	HD	HTT	Expansion	Female	42.1236904549048	151	16/45	(CAG)n EXPANSION	NYGC	PCR-free 450bp, Xv2.5
172	HD	HTT	Expansion	Male	46.9376917209709	151	16/43	(CAG)n EXPANSION	NYGC	PCR-free 450bp, Xv2.5
174	HD	HTT	Expansion	Female	38.6583020292561	151	20/48	(CAG)n EXPANSION	NYGC	PCR-free 450bp, Xv2.5
182	HD	HTT	Expansion	Male	43.3189925154002	151	20/48	(CAG)n EXPANSION	NYGC	PCR-free 450bp, Xv2.5
166	HD	HTT	Expansion	Female	38.5803289460833	151	45/52	(CAG)n EXPANSION	NYGC	PCR-free 450bp, Xv2.5
195	HD	HTT	Expansion	Male	39.8951911719844	151	18/52	(CAG)n EXPANSION	NYGC	PCR-free 450bp, Xv2.5
1043	HD	HTT	Expansion	Female	43.3185441464112	151	18/48	(CAG)n EXPANSION	NYGC	PCR-free 450bp, Xv2.5
1049	HD	HTT	Expansion	Male	40.0774873216412	151	22/45	(CAG)n EXPANSION	NYGC	PCR-free 450bp, Xv2.5
149	HD	HTT	Expansion	Male	43.9717248700323	151	42/46	(CAG)n EXPANSION	NYGC	PCR-free 450bp, Xv2.5
173	HD	HTT	Expansion	Male	47.0520635246093	151	44/47	(CAG)n EXPANSION	NYGC	PCR-free 450bp, Xv2.5
179	HD	HTT	Expansion	Female	35.5959623493898	151	42/42	(CAG)n EXPANSION	NYGC	PCR-free 450bp, Xv2.5
933	HD	HTT	Expansion	Male	37.2759661248244	151	42/46	(CAG)n EXPANSION	NYGC	PCR-free 450bp, Xv2.5
2999	HD	HTT	Expansion	Female	52.6477632754218	151	43/47	(CAG)n EXPANSION	NYGC	PCR-free 450bp, Xv2.5
3000	HD	HTT	Expansion	Female	56.5685336362407	151	18/44	(CAG)n EXPANSION	NYGC	PCR-free 450bp, Xv2.5
4709	HD	HTT	Expansion	Male	45.7486173512361	151	46/51	(CAG)n EXPANSION	NYGC	PCR-free 450bp, Xv2.5
598	HD	HTT	Expansion	Male	41.7744982840895	151	21/42	(CAG)n EXPANSION	NYGC	PCR-free 450bp, Xv2.5
3423	HD	HTT	Expansion	Male	49.6766957032236	151	20/43	(CAG)n EXPANSION	NYGC	PCR-free 450bp, Xv2.5
4381	HD	HTT	Expansion	Female	55.0370663825377	151	18/45	(CAG)n EXPANSION	NYGC	PCR-free 450bp, Xv2.5
346	HD	HTT	Expansion	Male	42.3715275851703	151	17/44	(CAG)n EXPANSION	NYGC	PCR-free 450bp, Xv2.5
587	HD	HTT	Expansion	Male	68.5646039902571	151	15/45	(CAG)n EXPANSION	NYGC	PCR-free 450bp, Xv2.5
1208	HD	HTT	Expansion	Female	63.1296733516225	151	20/47	(CAG)n EXPANSION	NYGC	PCR-free 450bp, Xv2.5
4399	HD	HTT	Expansion	Female	53.6662723882606	151	18/45	(CAG)n EXPANSION	NYGC	PCR-free 450bp, Xv2.5
198	HD	HTT	Expansion	Male	47.0258230935116	151	22/86	(CAG)n EXPANSION	NYGC	PCR-free 450bp, Xv2.5
297	HD	HTT	Expansion	Male	42.4210297532506	151	18/47	(CAG)n EXPANSION	NYGC	PCR-free 450bp, Xv2.5
653	HD	HTT	Expansion	Female	51.2220767161541	151	15/78	(CAG)n EXPANSION	NYGC	PCR-free 450bp, Xv2.5
832	HD	HTT	Expansion	Female	41.573883624042	151	20/44	(CAG)n EXPANSION	NYGC	PCR-free 450bp, Xv2.5
843	HD	HTT	Expansion	Male	43.6006296625828	151	17/43	(CAG)n EXPANSION	NYGC	PCR-free 450bp, Xv2.5
965	HD	HTT	Expansion	Female	50.0617427289182	151	19/44	(CAG)n EXPANSION	NYGC	PCR-free 450bp, Xv2.5
581	HD	HTT	Expansion	Female	45.4660041058784	151	33/44	(CAG)n EXPANSION	NYGC	PCR-free 450bp, Xv2.5
973	HD	HTT	Premutation	Male	44.862586695246	151	19/48	(CAG)n EXPANSION	NYGC	PCR-free 450bp, Xv2.5
